# Supplementary material
Source: PubMed Central journal article supplement (PMC6288279)
Supplement: mmc1.pdf [file mmc1.pdf]

## Supplemental Data

### **Bi-allelic *TMEM94* Truncating Variants Are Associated with Neurodevelopmental Delay, Congenital Heart Defects, and Distinct Facial Dysmorphism**

**Joshi Stephen, Sateesh Maddirevula, Sheela Nampoothiri, John D. Burke, Matthew Herzog, Anju Shukla, Katharina Steindl, Ascia Eskin, Siddaramappa J. Patil, Pascal Joset, Hane Lee, Lisa. J. Garrett, Tadafumi Yokoyama, Nicholas Balanda, Steven P. Bodine, Nathaniel J. Tolman, Patricia M. Zerfas, Allison Zheng, Georgia Ramantani, Katta M. Girisha, Cecilia Rivas, Pujar V. Suresh, Abdel Elkahloun, Hessa S. Alsaif, Salma M. Wakil, Laila Mahmoud, Rehab Ali, Michaela Prochazkova, Undiagnosed Diseases Network members, Ashok B. Kulkarni, Tawfeg Ben-Omran, Dilek Colak, H. Douglas Morris, Anita Rauch, Julian A. Martinez-Agosto, Stanley F. Nelson, Fowzan S. Alkuraya, William A. Gahl, and May Christine V. Malicdan**

## Supplemental Data

### Supplemental figures and legends

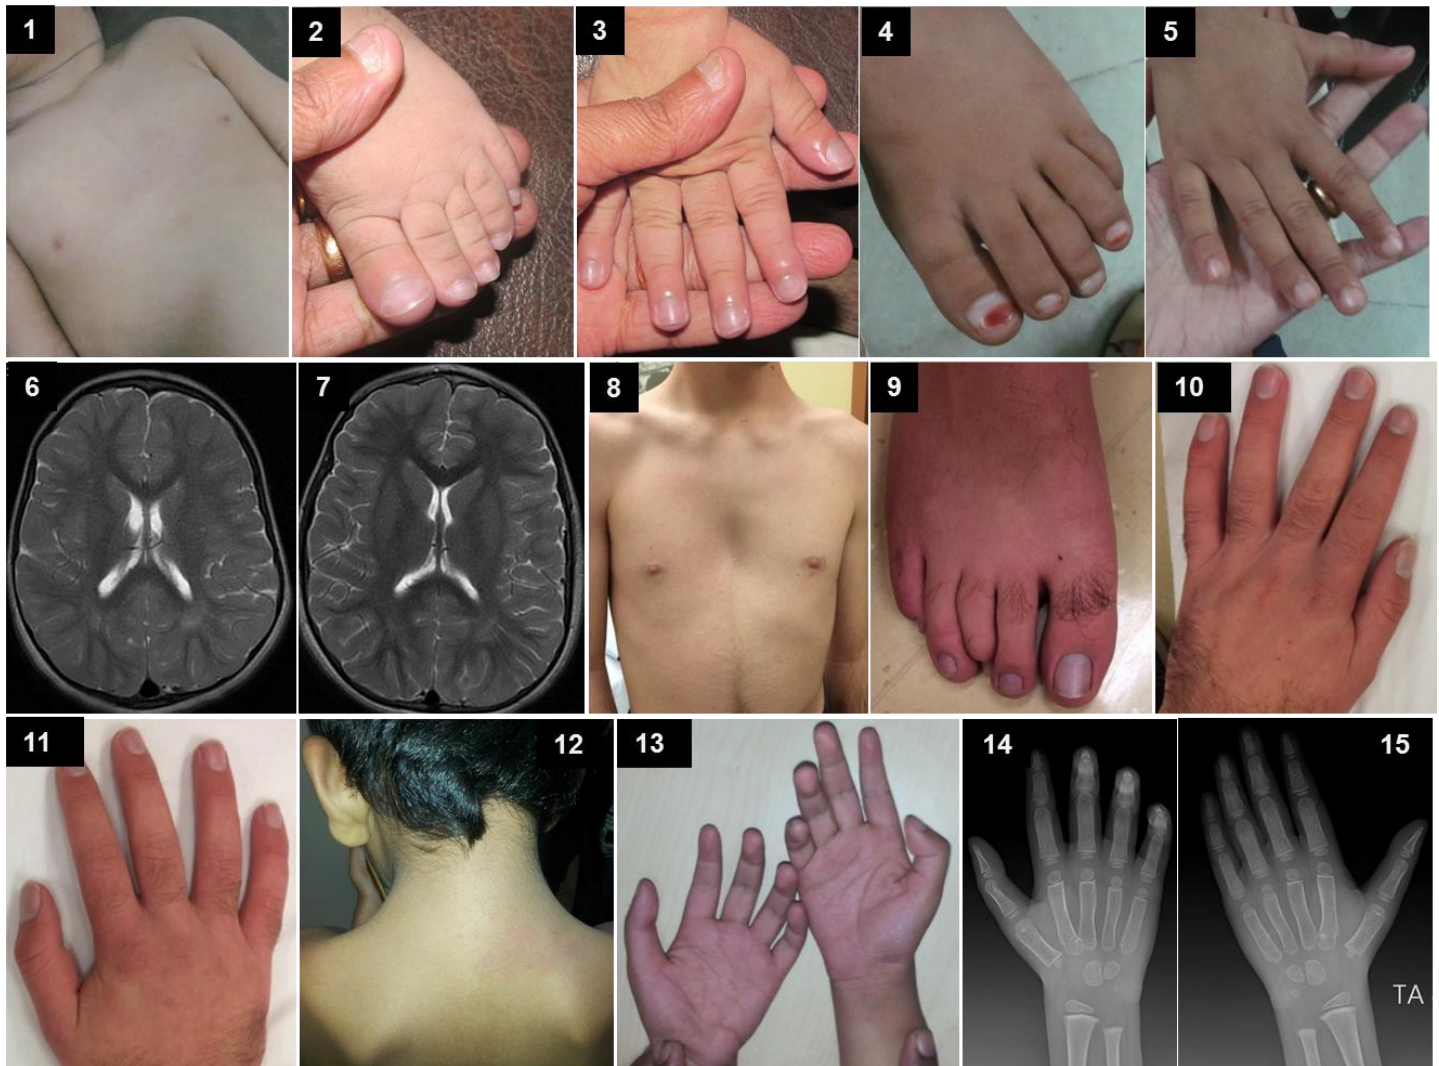

**Figure S1:** Additional clinical photographs of the families

(1-7) Photograph of proband (1-II.4 in Figure 1A) showing wide spaced nipples (1), normal toes and fingers (2 and 3; cyanosis and clubbing due to heart disease) and his affected elder sister (1-II.1 in Figure 1A) presented with long fingers and toes (4 and 5). MRI findings of both the affected members in family 1 were normal (6 is of 1-II.4 and 7 is of 1-II.1). (8-11) Photograph of the proband in family 3 showing pectus excavatum (8), bilateral overlapping of the 3<sup>rd</sup> toe by the 2<sup>nd</sup> and 4<sup>th</sup> toes (9) and archnodactyly of the fingers (10, 11). (12-15) Photograph of the proband in family 4 showing webbed neck (12), slender fingers and fetal finger pads (13) and X-ray showing no significant skeletal defects (14, 15).

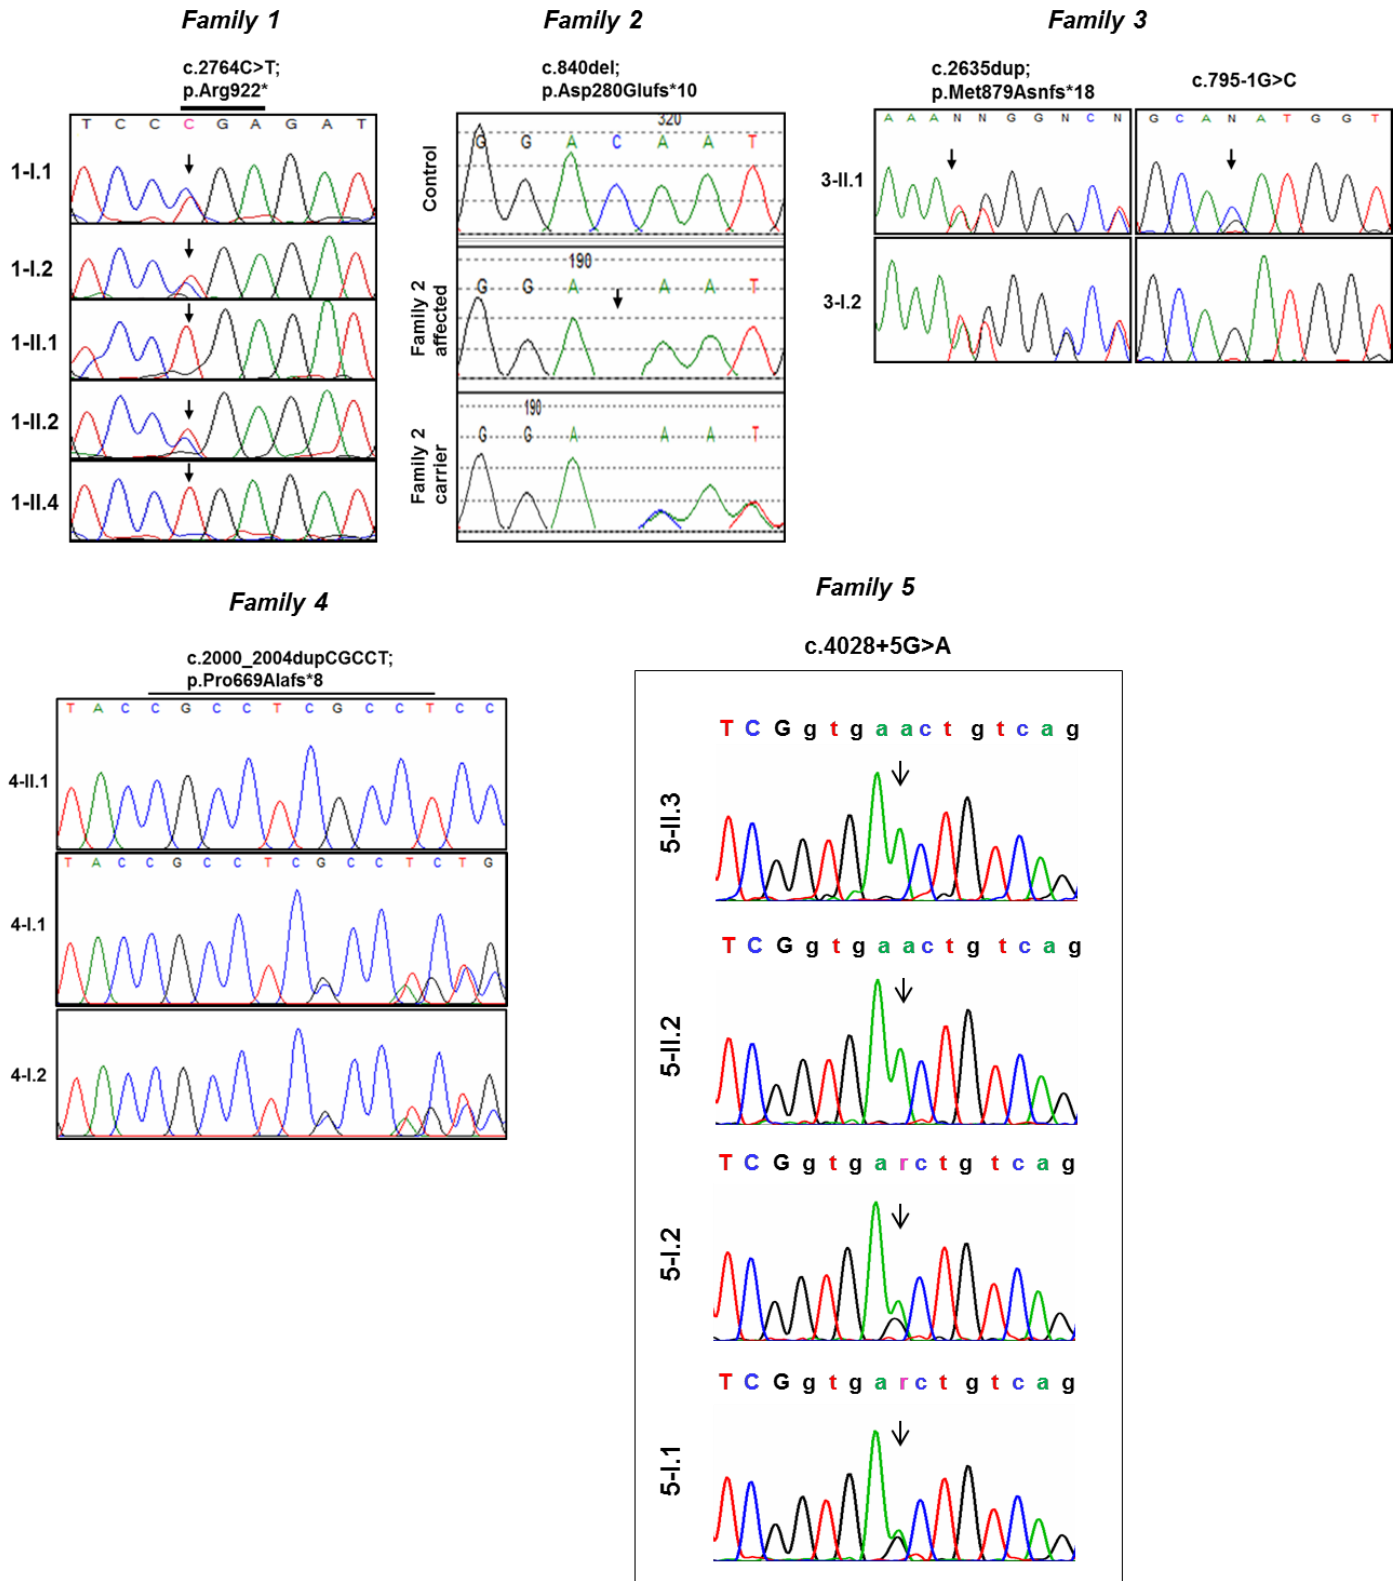

**Figure S2:** Sanger validation of *TMEM94* variants in genomic DNA level

Sanger confirmation and segregation of variants in each family are shown. Family number in respect to corresponding pedigree number in figure 1A and variants in each family are also mentioned.

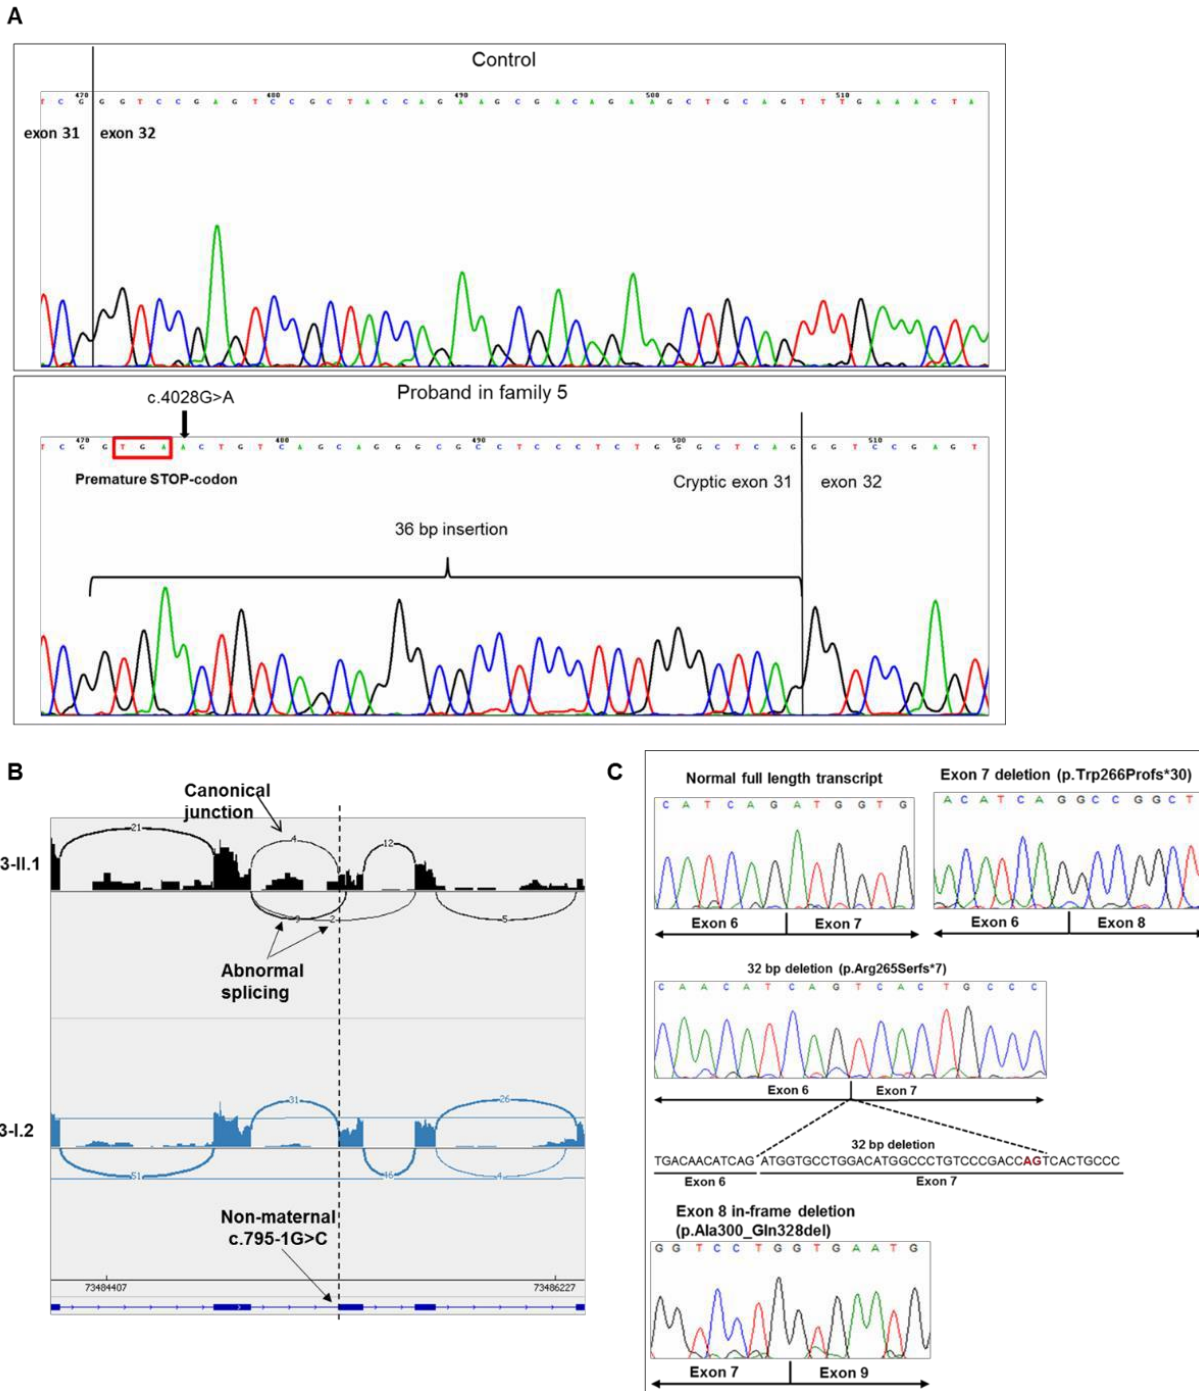

**Figure S3:** Splice site analysis on cDNA derived from the probands of family 3 and 5

(A) cDNA sequencing of primers flanking c.4028+5G>A variant in family 5 revealed an abnormal insertion due to an activation of a cryptic donor site 36 bp downstream within the intron compared to control. The aberrant transcript is predicted to result in a premature termination codon (red box) (B) Sashimi plot showing the splice alteration in the proband (3-II.1) as a result of a splice acceptor variant c.795-1G>C. Two different splice alterations were observed: 2 reads supporting exon skipping and 9 reads supporting a cryptic splice site created within an exon. Mother (3-I.2) did not carry the variant and shows normal canonical splice junctions (C) Multiple mutant transcripts were identified in the proband of family 3 (3-II.1) due to splice defect (shown in main figure 2C). The PCR products were subcloned in to TOPO vector and sequenced to confirm the mutant cDNA sequence. Sanger sequencing chromatograms showing the full-length transcript, exon 7 and exon 8 skipping and the 32bp deletion due to the activation of a cryptic acceptor site in the exonic region (of exon 7) are shown.

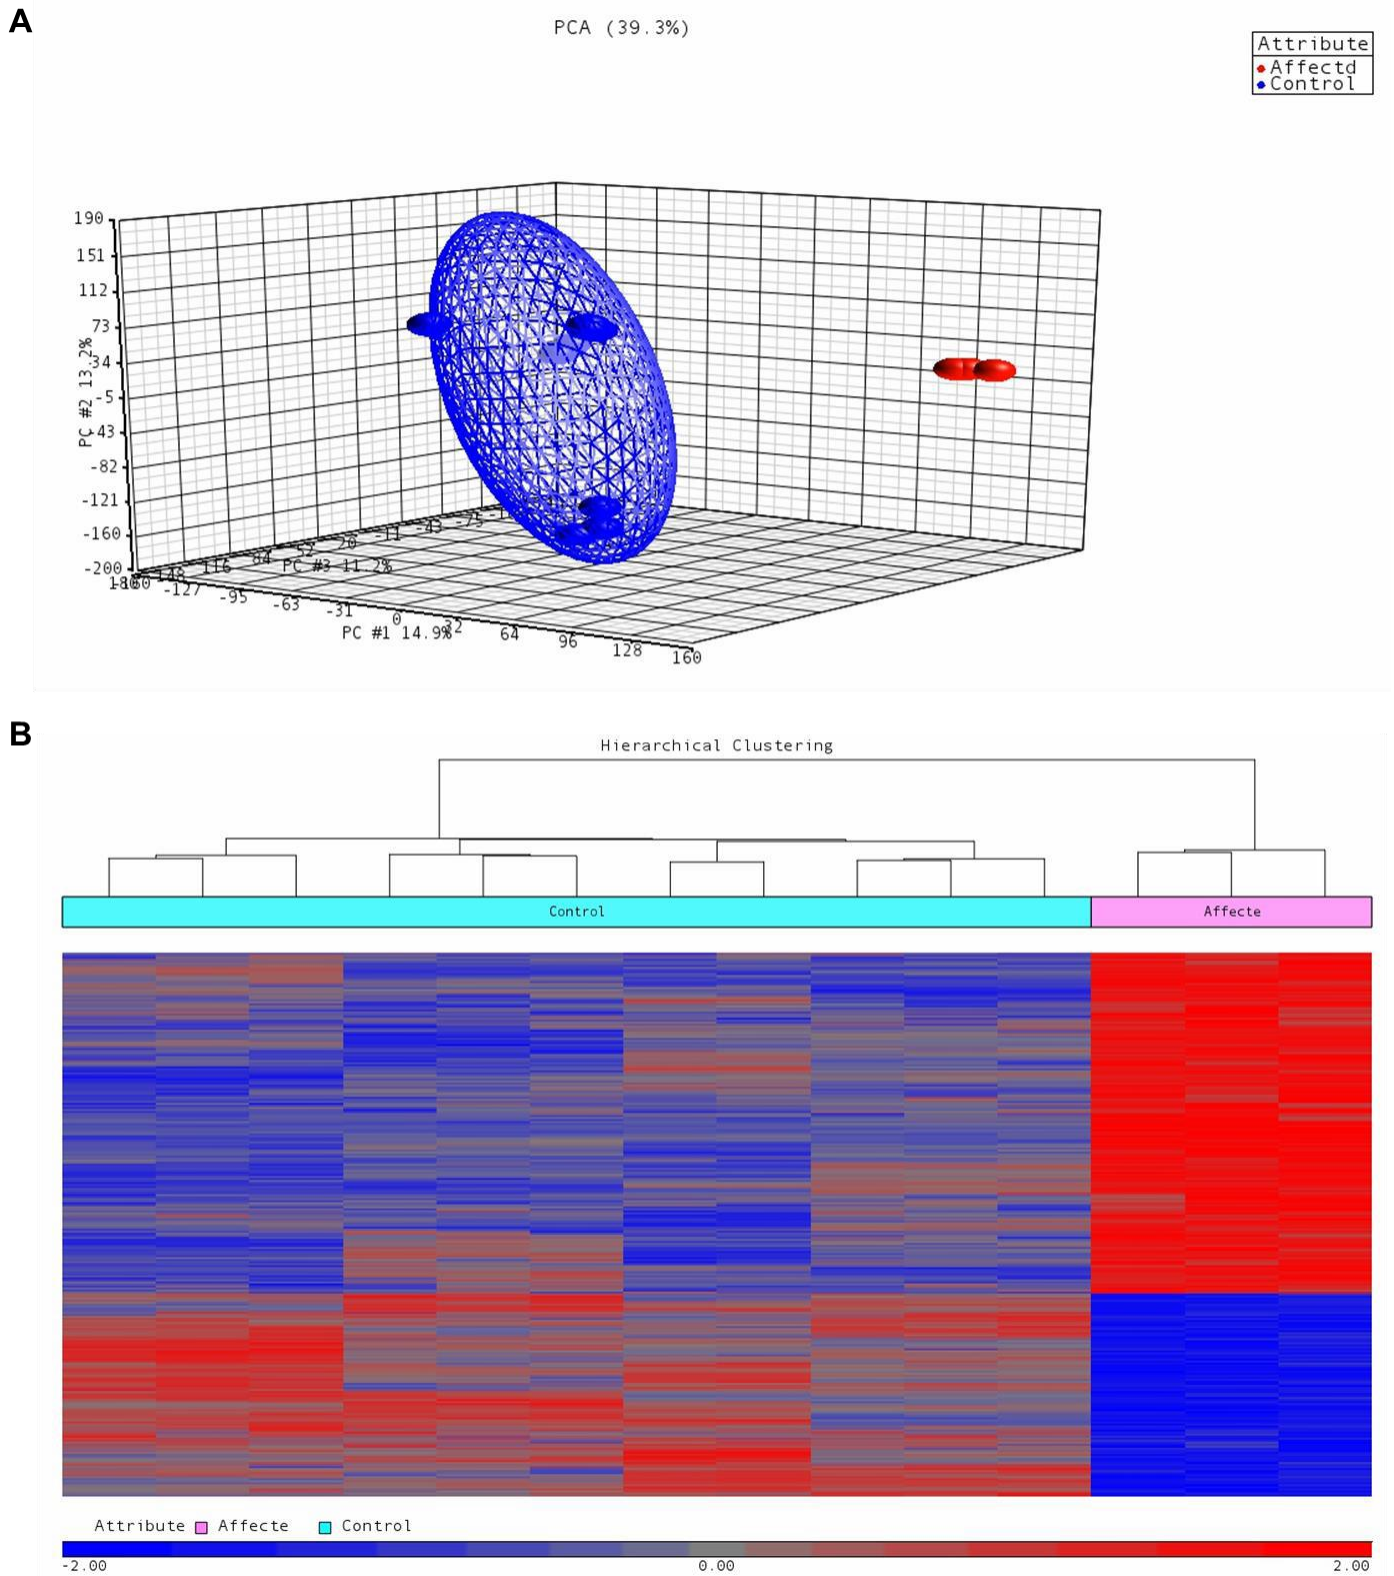

**Figure S4:** Global gene expression profiling using microarray

(A) Principal component analysis (PCA) and (B) Heatmap of genes that are significantly dysregulated in *TMEM94* deficient individual compared to controls. The expression level of each gene across the samples is scaled to  $[-2,2]$  interval.

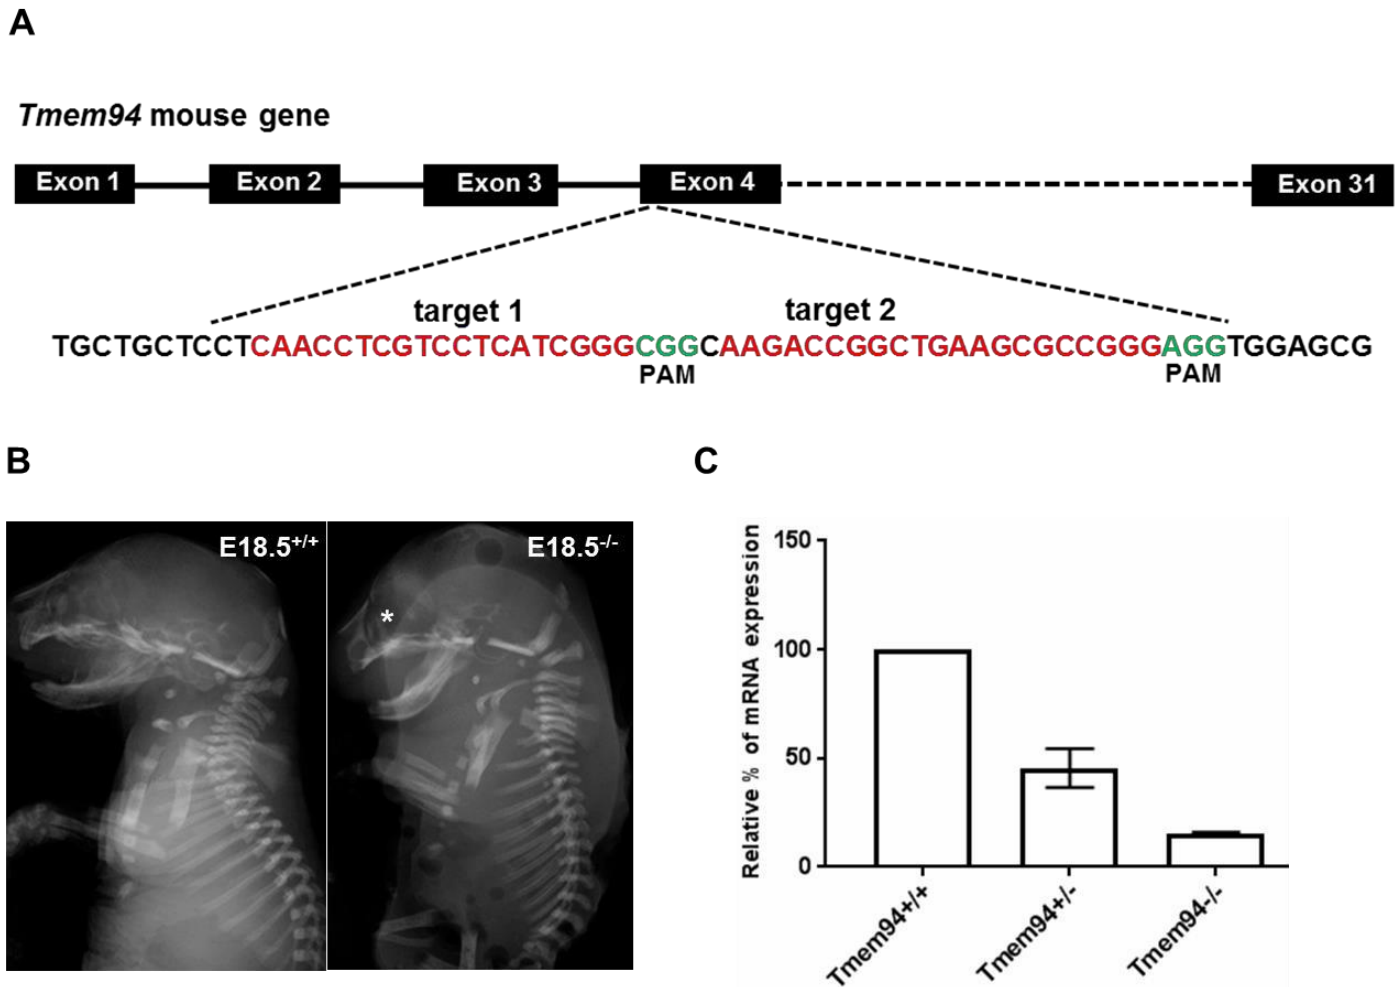

**Figure S5:** *Tmem94*<sup>-/-</sup> mice additional data and phenotype

(A) Schematic diagram representing *Tmem94* mouse gene and the two genomic targets (in exon 4) for CRISPR/Cas9 editing. Red highlighted areas are the two genomic targets in exon 4 and the nucleotides highlighted in green are PAM sequences (NGG), one for each target. The Cas9 is expected to cut few nucleotides upstream to the PAM sequence of each target (B) X-ray radiographs of wild type (left) and mutant (right) at E18.5 days showing reduced nasal bones in the mutant (asterisk) suggesting craniofacial abnormalities. (C) Relative quantification of mRNA level in *Tmem94* mutant embryos. Results were normalized to the expression of the housekeeping gene, *Polr2a*. Error bar represents standard deviation of mean expression in biological replicates.

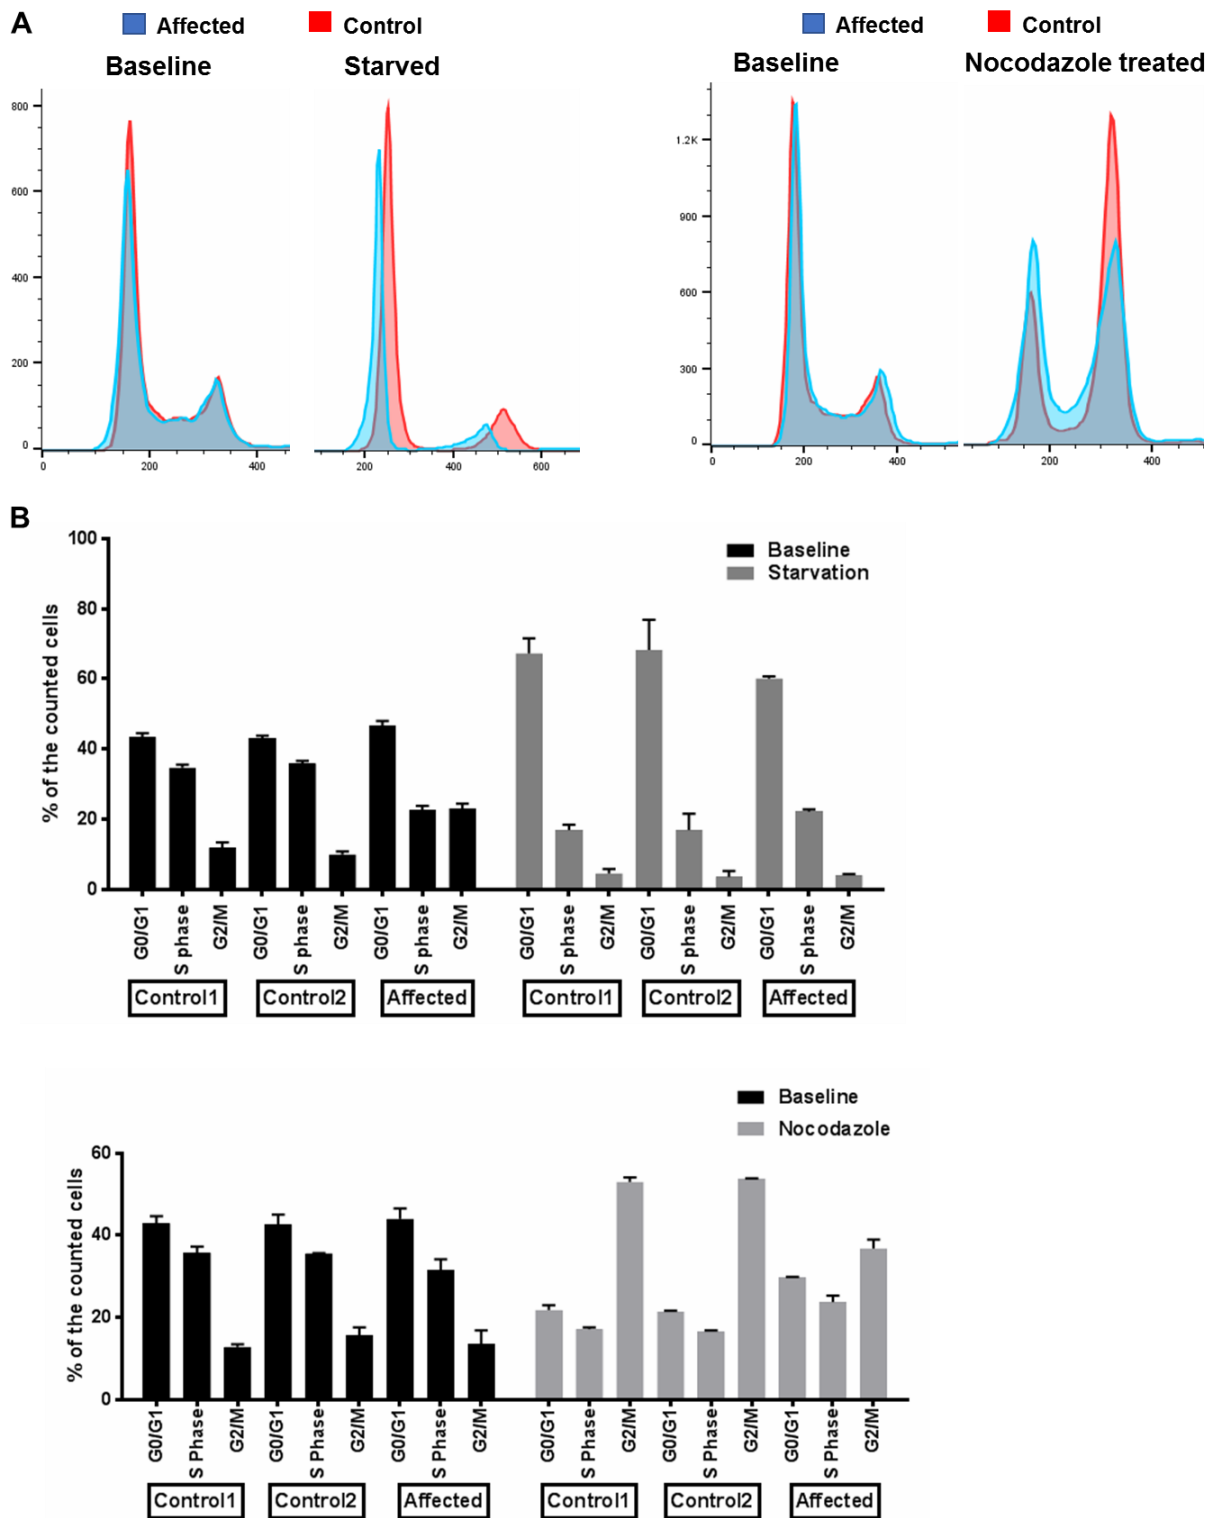

**Figure S6:** Flow cytometry measurement of DNA content of cells at different stages of cell cycle

(A) Representative cell cycle profile of control and proband derived fibroblasts (Blue: affected, Red: Controls) showed elevated percentage G0/G1 cells and lower percentage of the cells in G2/M phase in normal baseline condition. Upon starvation, G0/G1 were further elevated and G2/M phase cells were reduced in both control and affected (left panel). Overnight nocodazole treatment that arrests cells at G2/M phase of cell cycle, showed reduced percentage of G2/M phase cells in the affected, compared to the controls (right panel). (B) Graph showing the quantification of the experiment performed in starvation (Upper panel) and nocodazole treatment (lower panel). Experiments were done in triplicates and the error bar represents standard deviation of means.

## Supplemental tables

| Purpose                                             | Primer sequence                                                                                                                                 |
|-----------------------------------------------------|-------------------------------------------------------------------------------------------------------------------------------------------------|
| <b>Targeting oligos</b>                             | Target 1: 5'-CCTCAACCTCGTCCTCATCGGGC-3'<br>Target 2: 5'-GCAAGACCGGCTGAAGCGCCGGG-3'                                                              |
| <b>For in-vitro transcription</b>                   | Oligo 1<br>5'- <i>ttttaatac</i> <i>gactcactata</i> GGCCGATGAGGACGAGGTTG <u>gttttagagctagaa</u> -3'                                              |
|                                                     | Oligo 2<br>5'- <i>ttttaatac</i> <i>gactcactata</i> GGAAGACCGGCTGAAGCGCC <u>gttttagagctagaa</u> -3'                                              |
|                                                     | Low caps, Italics: T7 promoter region<br>High caps: genomic target region<br>Low caps, underlined: universal reverse primer binding region      |
|                                                     | Universal reverse primer<br>5'- <i>aaaagcaccgactcgg</i> <i>tgccacttttcaag</i> <i>ttgataacggactagcctattt</i> <i>aactgctatttctagctctaaaac</i> -3' |
|                                                     | Low caps, underlined: Oligo annealing region                                                                                                    |
| <b>Mouse genotyping</b>                             | Forward: 5'-GAGGTGGCCATAAGAAATAGGC-3'<br>Reverse: 5'-TGGTGACCGTGGCTATCCTA-3'                                                                    |
| <b>Human cDNA splice analysis</b>                   | Forward: 5'-GGGATCAAGGATGACGAGCA-3'<br>Reverse: 5'-GAGGACTGGAAAGAGCAGGG-3'                                                                      |
| <b>M13 Primers for the sequencing of the clones</b> | Forward: 5'-GTAAAACGACGGCCAG-3'<br>Reverse: 5'-CAGGAAACAGCTATGAC-3'                                                                             |
| <b>Human qPCR</b>                                   | <i>TMEM94</i> Forward: 5'-CTGCGAGGGATCATTGACCA-3'<br>Reverse: 5'-CTCTGTAGGCCCCAGTGCAAG-3'                                                       |
|                                                     | <i>POLR2A</i> Forward: 5'-CATGTGCAGGAAACATGACA-3'<br>Reverse: 5'-GCAGAAGAAGCAGACACAGC-3'                                                        |
| <b>Mouse qPCR analysis</b>                          | <i>Tmem94</i> Forward: 5'-GCGAGGAAGACCGTCCGA-3'<br>Reverse: 5'-TGCTTCTCCCTCAGGTCCAT-3'                                                          |
|                                                     | <i>Polr2a</i> Forward: 5'-GCACCATCAAGAGAGTGCAG-3'<br>Reverse: 5'-GTGGATCCATTAGTCCCCCA-3'                                                        |

**Table S1. Primers used in this study**

DNA oligos/primers used guide RNA synthesis, genotyping, cDNA analysis and qPCR



| Family   | Chromosome              | Homozygous stretch        | Candidate genes in the homozygous area |
|----------|-------------------------|---------------------------|----------------------------------------|
| Family 1 | 2                       | 190,970,774 - 207,953,087 | <i>NEMP2</i>                           |
|          | 4                       | 91,295,654 - 122,902,899  | None                                   |
|          | 6                       | 19,613,977 - 30,773,676   | None                                   |
|          | 9                       | 4,093,145 - 11,256,115    | None                                   |
|          | 10                      | 53,838,897 - 73,570,900   | None                                   |
|          | 15                      | 22,559,617 - 35,528,037   | None                                   |
|          | 16                      | 80,593,096 - 86,485,811   | None                                   |
|          | 17                      | 65,148,725 - 78,360,332   | <i>TRIM65, TMEM94</i>                  |
|          | 18                      | 70,471,959 - 73,808,200   | None                                   |
|          | 19                      | 9,465,329 - 44,716,770    | <i>SAMD4B</i>                          |
|          | 20                      | 57,088,334 - 63,025,520   | None                                   |
| Family 2 | 1                       | 29,190,140-39,500,180     | <i>SERINC2</i>                         |
|          | 2                       | 142,742,400-154,088,500   | None                                   |
|          | 4                       | 156,893,000-161,004,600   | None                                   |
|          | 17                      | 71,232,690-75,876,620     | <i>TMEM94</i>                          |
| Family 4 | 1                       | 753,541-4,592,116         | None                                   |
|          | 1                       | 4,598,021-8,345,298       | None                                   |
|          | 1                       | 8,356,170-14,864,580      | None                                   |
|          | 5                       | 10,111,180-15,729,889     | None                                   |
|          | 6                       | 68,452,823-77266188       | None                                   |
|          | 6                       | 99,462,075-103,188,348    | None                                   |
|          | 7                       | 53,998-5,214,016          | None                                   |
|          | 7                       | 6,650,687-13,277,948      | None                                   |
|          | 8                       | 55,402,535-63,461,952     | None                                   |
|          | 8                       | 63,490,414-72,299,671     | None                                   |
|          | 11                      | 204,228-4,460,348         | <i>TRPM5</i>                           |
|          | 12                      | 19,756,366-24,482,034     | None                                   |
|          | 12                      | 47,492,686-62,969,704     | None                                   |
|          | 12                      | 117,988,186-121,821,654   | None                                   |
| 12       | 121,847,135-124,891,294 | None                      |                                        |

|          |    |                         |                      |
|----------|----|-------------------------|----------------------|
|          | 12 | 124,902,199-130,225,459 | <i>TMEM132B</i>      |
|          | 14 | 33,126,223-49,609,674   | None                 |
|          | 14 | 52,640,208-57,040,997   | None                 |
|          | 17 | 68,506,237-75,539,771   | <i>TMEM94</i>        |
| Family 5 | 1  | 27,543,522-34,206,979   | None                 |
|          | 2  | 56,480,570-60,580,831   | None                 |
|          | 6  | 117,392,770-121,904,036 | None                 |
|          | 6  | 134,378,251-138,898,188 | <i>IL20RA</i>        |
|          | 7  | 130,915,278-134,242,036 | None                 |
|          | 11 | 2,252,208-6,324,678     | None                 |
|          | 12 | 53,364,506-57,179,340   | None                 |
|          | 16 | 30,444,444-35,220,544   | None                 |
|          | 17 | 72,044,131-75,164,427   | <i>TMEM94, ITGB4</i> |

**Table S2. Regions of homozygosity**

Homozygous regions segregating with the proband and affected siblings in consanguineous families

|                                                                                                                     | Family 1 | Family 2 | Family 4 | Family 5 |
|---------------------------------------------------------------------------------------------------------------------|----------|----------|----------|----------|
| Total number of variants                                                                                            | 82,025   | 71,450   | 39,739   | 92,141   |
| Homozygous variants                                                                                                 | 35,509   | 33,781   | 15,539   | 29,675   |
| Exonic and splicing                                                                                                 | 9160     | 8,777    | 11,079   | 10,404   |
| Allele frequency <0.01 in ExAC database                                                                             | 95       | 386      | 204      | 232      |
| Number of variants with no healthy homozygote in ExAC database                                                      | 34       | 297      | 95       | 225      |
| Number of variants present in homozygous area                                                                       | 11       | 9        | 21       | 6        |
| Number of variants segregate with the affected sibling and predicted to be pathogenic according to prediction tools | 4        | 2        | 3        | 2        |

**Table S3. Filtering strategy of variants identified in the four consanguineous families (Family 1, 2, 4 and 5)**

Variant filtering and identification of segregated variants in the homozygous area

|                                                                                                                                                                                                                                                                                                                                          |               |
|------------------------------------------------------------------------------------------------------------------------------------------------------------------------------------------------------------------------------------------------------------------------------------------------------------------------------------------|---------------|
| Total number of variants                                                                                                                                                                                                                                                                                                                 | 5,101,964     |
| Exonic and splicing                                                                                                                                                                                                                                                                                                                      | 26,661        |
| Missense + LoF variants                                                                                                                                                                                                                                                                                                                  | 10,366        |
| Allele frequency <0.01 in ExAC database                                                                                                                                                                                                                                                                                                  | 1,772         |
| Number of variants with no healthy homozygote in ExAC database                                                                                                                                                                                                                                                                           | 1,477         |
| Number of heterozygous variants that are greater than or equal to 2 for each gene                                                                                                                                                                                                                                                        | 27 (10 genes) |
| Number of compound heterozygous variants (Father DNA sample was unavailable so the variants that are not inherited from the mother was assumed to be inherited from the father) + number of assumed <i>de novo</i> variants (heterozygous variants that are not inherited from the mother and not seen as heterozygous in ExAC database) | 6             |

**Table S4: Variant filtering strategy of family 3**

Filtering strategy of the variants identified through whole genome sequencing in the affected individual of family 3

| Family   | Genomic position                 | Gene                             | Variant                                  | CADD score | Allele frequency in ExAC       | SIFT        | Mutation Taster | Polyphen -2       |
|----------|----------------------------------|----------------------------------|------------------------------------------|------------|--------------------------------|-------------|-----------------|-------------------|
| Family 1 | Chr2:<br>191383489A><br>C        | <i>NEMP2</i>                     | c.491T>G<br>p.Leu164Arg                  | 16         | Not present in ExAc and gnomAD | Deleterious | Disease causing | Probably damaging |
|          | Chr17:<br>73887162G>A            | <i>TRIM65</i>                    | c.1252C>T<br>p.Arg418Trp                 | 15         | <b>0.0001726</b>               | Deleterious | Disease causing | Probably damaging |
|          | <b>Chr17:<br/>73491370C&gt;T</b> | <b><i>TMEM94</i></b>             | <b>c.2764C&gt;T,<br/>p.Arg922*</b>       | <b>43</b>  | <b>0.0000086</b>               | <b>NA</b>   | <b>Damaging</b> | <b>NA</b>         |
|          | Chr19:<br>39867411G>A            | <i>SAMD4B</i>                    | c.1084G>A,<br>p.Val362Ile                | 17         | 0.0000165                      | Tolerated   | Disease causing | Probably damaging |
| Family 2 | Chr1:<br>31906993T>C             | <i>SERINC2</i>                   | c.1327T>C<br>p.Tyr443His                 | 28.8       | NA                             | Deleterious | Disease causing | Probably damaging |
|          | <b>Chr17:<br/>73485392del</b>    | <b><i>TMEM94</i></b>             | <b>c.840del,<br/>p.Asp280Glufs*10</b>    | <b>NA</b>  | <b>NA</b>                      | <b>NA</b>   | <b>NA</b>       | <b>NA</b>         |
| Family 3 | <b>17:73485346</b>               | <b><i>TMEM94</i><sup>b</sup></b> | <b>NM_001321148.1:<br/>c.795-1G&gt;C</b> | <b>21</b>  | <b>NA</b>                      | <b>NA</b>   | <b>Damaging</b> | <b>NA</b>         |

|          |                                             |                                            |                                                                  |      |                 |             |                    |                      |
|----------|---------------------------------------------|--------------------------------------------|------------------------------------------------------------------|------|-----------------|-------------|--------------------|----------------------|
|          | 17:73490987                                 | <i>TMEM94</i> <sup>a</sup>                 | NM_001321148.1:<br>c.2635dupA;<br>p.(Met879Asnfs*18)             | NA   | NA              | NA          | NA                 | NA                   |
|          | 20:62194000                                 | <i>HELZ2</i> <sup>a</sup><br>(MIM611265)   | NM_001037335.2:<br>c.6175C>T;<br>NP_001032412.2:p<br>.Arg2059Trp | 5    | 0.0004468<br>1  | Damaging    | Tolerated          | Benign               |
|          | 20:62195413                                 | <i>HELZ2</i> <sup>b</sup>                  | NM_001037335.2:<br>c.4762G>C;<br>NP_001032412.2:p<br>.Gly1588Arg | 0    | 0.0000099<br>2  | Tolerated   | Tolerated          | Benign               |
|          | 8:61774792                                  | <i>CHD7</i> <sup>b</sup><br>(MIM 608892)   | NM_017780.3:c.78<br>68C>T;<br>NP_060250.2:p.Pr<br>o2623Leu       | 33   | NA              | Damaging    | Damaging           | Probably<br>Damaging |
|          | 1:7724106                                   | <i>CAMTA1</i> <sup>b</sup><br>(MIM 611501) | NM_015215.2:c.14<br>99G>C;<br>NP_056030.1:p.Gl<br>y500Ala        | 19   | NA              | Damaging    | Damaging           | Probably<br>Damaging |
| Family 4 | Chr11:<br>2434775G>A                        | <i>TRPM5</i>                               | c.1934C>T;<br>p.Thr645Met                                        | 24.6 | 0.0000087<br>36 | Deleterious | Disease<br>causing | Probably<br>damaging |
|          | Chr12:<br>126138252T><br>C                  | <i>TMEM132B</i>                            | c.769T>C;<br>p.Trp257Arg                                         | 25.4 | 0.0000165<br>6  | Deleterious | Disease<br>causing | Probably<br>damaging |
|          | <b>Chr17:<br/>73489067_734<br/>89071dup</b> | <i>TMEM94</i>                              | <b>c.2000_2004dup;<br/>p.Pro669Alafs*8</b>                       | NA   | NA              | NA          | NA                 | NA                   |
| Family 5 | Chr17:<br>73725516 C>T                      | <i>ITGB4</i>                               | c.737C>T;<br>p.(Thr246Met)                                       | NA   | NA              | Deleterious | Disease<br>causing | Probably<br>damaging |
|          | <b>Chr17:<br/>73495168G&gt;A</b>            | <i>TMEM94</i>                              | <b>c.4028+5G&gt;A; p.?</b>                                       | NA   | NA              | NA          | NA                 | NA                   |
| Family 6 | <b>Chr17:<br/>7349392del</b>                | <i>TMEM94</i>                              | <b>c.3497delA;<br/>p.Asn1166Thrfs*84</b>                         | NA   | NA              | NA          | NA                 | NA                   |
|          | Chr17:<br>78087081G>A                       | <i>GAA</i>                                 | c.2105G>A;<br>p.Arg702His                                        | 32   | 0.00005         | Deleterious | Disease<br>causing | Probably<br>damaging |

a, maternal; b, non-maternal; NA, not available

### Table S5. Final list of variants in in all families

Final list of variants that are segregated with affected individuals of all 6 families. For family 1, 2, 4, 5 and 6 all the variants shown are homozygous and for family 3, all the variants listed are heterozygous. In family 1, all four variants were heterozygous in the unaffected sibling and parents (Figure 2A-II.2), and homozygous in both affected individuals (Figure 2A-II.1 and II.4). In family 2, the two variants (in *SERINC2* and *TMEM94*) were segregated with the affected status. Truncating variants in *TMEM94* is common in all families.

| Gene                       | Log <sub>2</sub> Fold Change | P-adjusted value |
|----------------------------|------------------------------|------------------|
| <b>Downregulated genes</b> |                              |                  |
| <i>PTN</i>                 | -5.431                       | 0.036297         |
| <i>RNU5F-1</i>             | -1.799                       | 0.046349         |
| <i>WWC1</i>                | -1.765                       | 0.048065         |
| <i>HSPA7</i>               | -1.546                       | 0.018122         |
| <i>ABCA10</i>              | -1.404                       | 2.24E-08         |
| <i>FEZ1</i>                | -1.115                       | 0.003138         |
| <i>TP73</i>                | -1.166                       | 0.010215         |
| <i>SAT1</i>                | -1.098                       | 0.000908         |
| <i>TMEM94</i>              | -0.932                       | 3.72E-06         |
| <i>WSB2</i>                | -0.909                       | 0.009543         |
| <i>PIGZ</i>                | -0.845                       | 0.01331          |
| <i>DDIT4</i>               | -0.781                       | 0.005472         |
| <i>LSM10</i>               | -0.527                       | 0.009628         |
| <i>SNRPA</i>               | -0.53                        | 0.0205           |
| <i>NPRL3</i>               | -0.278                       | 0.049298         |
| <i>LSM14B</i>              | -0.259                       | 0.034164         |
| <i>DCAF16</i>              | -0.245                       | 0.021265         |
| <b>Upregulated genes</b>   |                              |                  |
| <i>CUL4A</i>               | 0.264                        | 0.027476         |
| <i>C5orf24</i>             | 0.305                        | 0.034925         |
| <i>ZNF525</i>              | 0.456                        | 0.005502         |
| <i>N4BP2</i>               | 0.623                        | 0.019307         |
| <i>HSPBAP1</i>             | 0.651                        | 0.027831         |
| <i>RBM3</i>                | 0.655                        | 0.001065         |
| <i>ARL14EP</i>             | 0.772                        | 0.000299         |
| <i>TP63</i>                | 0.862                        | 0.010919         |
| <i>ERMAP</i>               | 0.907                        | 0.000539         |
| <i>ADO</i>                 | 0.948                        | 0.02027          |
| <i>ZNF239</i>              | 0.911                        | 0.046975         |
| <i>PCBD2</i>               | 1.059                        | 0.003243         |
| <i>DHRS3</i>               | 1.514                        | 0.021039         |
| <i>DAB2IP</i>              | 2.376                        | 0.000176         |
| <i>WFDC2</i>               | 3.963                        | 2.27E-07         |

**Table S7. List of genes in the *TMEM94* interaction network identified in all the affected siblings in family 2**

Detailed table displaying the fold change equal or greater than 1.5, with their corresponding *P*-adjusted values of genes identified in *TMEM94* interaction network of dysregulated genes identified through RNA Sequencing (Benjamini-Hochberg correction for multiple comparisons). Interestingly, some of the genes identified have profound role in neurological function; *RBM3* (MIM 300027), which is associated with synapse regeneration<sup>1</sup> and shown to interact with *TMEM94*<sup>2</sup>; *PTN* (MIM 162095), a mitogenic protein involves in neurite outgrowth and embryogenesis<sup>3</sup>, *TP73* (MIM 601990), which is thought to be involved in the process of neurodegeneration<sup>4</sup>; *WWC*, a gene associated with human memory performance<sup>5</sup>; *FEZ1* (MIM 604825), observed to be involved in axonal outgrowth<sup>6</sup>; *NPRL3* (MIM 600928), a regulator of mTOR signaling and associated with focal epilepsy and

cortical dysplasia (MIM 617118)<sup>7; 8</sup>; and *CUL4A* (MIM 603137), is involved in cell cycle progression and early embryogenesis<sup>9; 10</sup>.

## Supplemental Methods

### SNP array, whole exome sequencing and whole genome sequencing

For Family 1, SNP genotyping was performed on genomic DNA from the proband and parents as previously described<sup>11</sup>; regions of homozygosity greater than 5Mb were selected for further analysis. Exome sequencing was performed using the Agilent SureSelect Target Enrichment Kit and the Illumina HiSeq 2000/2500 sequencer (Illumina, San Diego, CA) according to the manufacturer's instructions. Reads were aligned with human reference genome (hg19; NCBI build 37; Feb. 2009) using the Burrows-Wheeler Alignment Tool<sup>12</sup>. Variant calling was performed with GATK<sup>13</sup> and functionally annotated using SnpEff<sup>14</sup>. Because of consanguinity in the pedigree, homozygous variants were filtered based on allele frequencies less than 0.01 with no reported healthy homozygotes in online databases, dbSNP, 1000G, ESP6500 and ExAC. Likely pathogenicity was determined by online prediction tools (Polyphen, SIFT, CADD, and Mutation Taster) or if the variants were truncating (splicing or non-sense). For confirmation and family screening, the identified candidates were PCR amplified using primers flanking specific regions. PCR products were treated with BigDye V3.1 Terminator chemistry (Applied Biosystems, Warrington, UK) and electrophoresed on a ABI 3130xl genetic analyzer (Applied Biosystems, Foster city, CA, USA). The Sanger sequencing data were analyzed using Sequencher software (Gene Codes Corporation, Ann Arbor, MI, USA).

For Family 2, blood was collected in EDTA vials and DNA was extracted from all family members and subjected to genotyping (Axiom SNP chip platform) as described<sup>15</sup>. Index DNA was subjected to exome sequence by using TruSeq Exome Enrichment kit (Illumina) under the manufacturer's guidelines. Prepared sequence libraries were enriched using the Illumina Exome Enrichment protocol and sequenced using an Illumina HiSeq 2000 Sequencer. Sequenced reads were aligned against UCSC hg19 by BWA (see URL's). Homozygous variants (coding and splicing) within the 2MB region of ROH were considered as candidates based on the following criteria: MAF <0.01 in variant databases (see URL's) including 1000 Genomes, ExAC, gnomAD and exome variant server and in 2,379 in-house exomes; scores in SIFT, Polyphen and CADD Phred; and confirmation of identified homozygous variants by segregation in the family.

For Family 3, Whole Genome Sequencing was performed using the Illumina HiSeq sequencing platform. Briefly, DNA was extracted from the provided sample and measured for integrity via gel electrophoresis and appropriate concentration via fluorescent concentration determination. The DNA was then sonicated to a specific fragment size and prepared as a paired-end library with ligation of Illumina-flow cell specific adapter sequences and a unique barcode. Prepared library was then quality checked for adequate yield through fluorescent methods and quantitative PCR, as well as accurate library size and profile using bioanalysis. Libraries were clustered onto

Illumina HiSeq flow cells and sequenced using standard Illumina reagents and protocols. After sequencing, reads were generated using Illumina's bcl2 fastq and data were aligned to the human reference GRCh37. Using this technology, it is only possible to sequence 90% to 95% of the human reference genome. Analysis of the sequencing depth of all coding regions of the genome is available upon request. A gene with insufficient coverage may harbor variants that are not detected by this test. A gene may appear to have inadequate coverage when there is a deletion or insertion in the proband's gene sequence compared to the reference sequence.

For Family 4, exome sequencing was carried out on clinical basis. Genomic DNA was isolated from blood collected from proband and the parents by QIAamp DNA Blood Mini Kit (Qiagen, Valencia, CA, USA) according to manufacturer's instructions. Chromosomal microarray (CMA) was done on leukocyte-derived DNA of the proband using Illumina HumanCytoSNP-12. The genome-wide resolution of this array is ~30 kb. CMA showed no pathogenic copy number variants. A benign hemizygous deletion of size 296 kb was found at cytoband Xq28 (genomic coordinates 154939018-155235833 GRCh37/hg19) (genes *SPRY3*, *VAMP7*, *IL9R*), in addition to 19 regions of homozygosity. For exome sequencing, genomic capture was performed using Illumina's Nextera Rapid Capture Exome Kit. NextSeq500 Sequencer (Illumina, Inc., San Diego, CA, USA.) in combination with the NextSeq™ 500 High Output Kit (2×150 bp) was used for massive parallel sequencing. The raw data analysis and variant calling were performed based on GATK Best Practices for germline SNPs and Indels (version 3.6-0-g89b7209). Annotation of the called variants was done by ANNOVAR v.2016Feb01. Along with annotation, Online Mendelian Inheritance in Man (OMIM) and Human Phenotype Ontology (HPO) phenotypic information were also integrated using the in-house developed scripts. The strategy used for the variant filtering is as described in the Table S3. Candidate variants were validated and segregation analysis was carried out by Sanger sequencing.

For Family 5, genomic DNA was extracted from EDTA blood of the proband, her sister and her parents. Affymetrix Cytoscan (2.65 M) Array on the proband was performed calling bigger CNVs and regions of homozygosity greater than 3 Mb. Whole Exome Sequencing (WES) on the proband was performed using the Agilent SureSelectXT Kit (V6) with paired-end sequencing (HiSeq SBS Kit v4, 125 Fwd-125 Rev, Q30-value: 79.5) on a HiSeq System (Illumina Inc.). Raw fastQ files were aligned to the hg19 reference genome using NextGene (Softgenetics). Variants observed in at least 16% of reads with sufficient quality level and with Minor Allele Frequency  $\leq 2\%$  were investigated for deleterious In-Silico effects, by associations of the affected genes with proband's phenotype, by literature search for evident functional information and because of suspicion for consanguinity of the parents for homozygosity. The *TMEM94* (NM\_014738.5) variants from the WES were confirmed in index, her sister and their parents after PCR amplification by Sanger sequencing using an ABI Genetic Analyzer 3730 (Applied Biosystems, Foster City, California).

For Family 6, clinical whole exome sequencing (XomeDx) was performed on the proband, mother, father and unaffected sister, at GeneDx (Gaithersburg, MD, USA).

## Cell cycle assay

Skin derived fibroblasts from the affected individual from family 3 (Family 3-II.1) and two unaffected controls (purchased from ATCC, Manassas, VA, USA, catalogue number PCS-201-012) were seeded in 50-60% confluence. Cells were synchronized either by starvation in serum-free EBSS media for 48 hours, or treatment with 100ng/mL nocodazole overnight. Cells were then washed twice in cold phosphate buffered saline, and trypsinized. Harvested cells were subsequently fixed and stained with propidium iodide (PI) (NuCycl™ PI Kit; Exalpha Biologicals, Shirley, MA, USA) according to the manufacturer's instructions, and PI staining was quantified with a BD FACS Calibur flow cytometer (BD Biosciences, San Jose, CA, USA). The percentage of the cells in G0/G1, S, and G2/M phase were automatically counted and compared (FlowJo software; TreeStar, Ashland, OR, USA). The experiments were repeated in triplicate.

## Supplemental References

1. Peretti, D., Bastide, A., Radford, H., Verity, N., Molloy, C., Martin, M.G., Moreno, J.A., Steinert, J.R., Smith, T., Dinsdale, D., et al. (2015). RBM3 mediates structural plasticity and protective effects of cooling in neurodegeneration. *Nature* 518, 236-239.
2. Zhu, X., Zelmer, A., Kapfhammer, J.P., and Wellmann, S. (2016). Cold-inducible RBM3 inhibits PERK phosphorylation through cooperation with NF90 to protect cells from endoplasmic reticulum stress. *FASEB journal : official publication of the Federation of American Societies for Experimental Biology* 30, 624-634.
3. Li, Y.S., Milner, P.G., Chauhan, A.K., Watson, M.A., Hoffman, R.M., Kodner, C.M., Milbrandt, J., and Deuel, T.F. (1990). Cloning and expression of a developmentally regulated protein that induces mitogenic and neurite outgrowth activity. *Science* 250, 1690-1694.
4. Wetzel, M.K., Naska, S., Laliberte, C.L., Rymar, V.V., Fujitani, M., Biernaskie, J.A., Cole, C.J., Lerch, J.P., Spring, S., Wang, S.H., et al. (2008). p73 regulates neurodegeneration and phospho-tau accumulation during aging and Alzheimer's disease. *Neuron* 59, 708-721.
5. Papassotiropoulos, A., Stephan, D.A., Huentelman, M.J., Hoerdli, F.J., Craig, D.W., Pearson, J.V., Huynh, K.D., Brunner, F., Corneveaux, J., Osborne, D., et al. (2006). Common Kibra alleles are associated with human memory performance. *Science* 314, 475-478.
6. Bloom, L., and Horvitz, H.R. (1997). The *Caenorhabditis elegans* gene *unc-76* and its human homologs define a new gene family involved in axonal outgrowth and fasciculation. *Proc Natl Acad Sci U S A* 94, 3414-3419.
7. Ricos, M.G., Hodgson, B.L., Pippucci, T., Saidin, A., Ong, Y.S., Heron, S.E., Licchetta, L., Bisulli, F., Bayly, M.A., Hughes, J., et al. (2016). Mutations in the mammalian target of rapamycin pathway regulators NPRL2 and NPRL3 cause focal epilepsy. *Annals of neurology* 79, 120-131.
8. Sim, J.C., Scerri, T., Fanjul-Fernandez, M., Riseley, J.R., Gillies, G., Pope, K., van Roozendaal, H., Heng, J.I., Mandelstam, S.A., McGillivray, G., et al. (2016). Familial cortical dysplasia caused by mutation in the mammalian target of rapamycin regulator NPRL3. *Annals of neurology* 79, 132-137.
9. Kopanja, D., Stoyanova, T., Okur, M.N., Huang, E., Bagchi, S., and Raychaudhuri, P. (2009). Proliferation defects and genome instability in cells lacking Cul4A. *Oncogene* 28, 2456-2465.
10. Li, B., Ruiz, J.C., and Chun, K.T. (2002). CUL-4A is critical for early embryonic development. *Molecular and cellular biology* 22, 4997-5005.
11. Stephen, J., Vilboux, T., Haberman, Y., Pri-Chen, H., Pode-Shakked, B., Mazaheri, S., Marek-Yagel, D., Barel, O., Di Segni, A., Eyal, E., et al. (2016). Congenital protein losing enteropathy: an inborn error of lipid metabolism due to DGAT1 mutations. *European journal of human genetics : EJHG* 24, 1268-1273.
12. Li, H., and Durbin, R. (2009). Fast and accurate short read alignment with Burrows-Wheeler transform. *Bioinformatics (Oxford, England)* 25, 1754-1760.



13. McKenna, A., Hanna, M., Banks, E., Sivachenko, A., Cibulskis, K., Kernytsky, A., Garimella, K., Altshuler, D., Gabriel, S., Daly, M., et al. (2010). The Genome Analysis Toolkit: a MapReduce framework for analyzing next-generation DNA sequencing data. *Genome research* 20, 1297-1303.
14. Cingolani, P., Platts, A., Wang le, L., Coon, M., Nguyen, T., Wang, L., Land, S.J., Lu, X., and Ruden, D.M. (2012). A program for annotating and predicting the effects of single nucleotide polymorphisms, SnpEff: SNPs in the genome of *Drosophila melanogaster* strain w1118; iso-2; iso-3. *Fly* 6, 80-92.
15. Alkuraya, F.S. (2012). Discovery of rare homozygous mutations from studies of consanguineous pedigrees. *Current protocols in human genetics* Chapter 6, Unit6.12.
