# Supplementary material
Source: PubMed Central journal article supplement (PMC6288279)
Supplement: mmc3.pdf [file mmc3.pdf]

# Bi-allelic *TMEM94* Truncating Variants Are Associated with Neurodevelopmental Delay, Congenital Heart Defects, and Distinct Facial Dysmorphism

Joshi Stephen,<sup>1,22</sup> Sateesh Maddirevula,<sup>2,22</sup> Sheela Nampoothiri,<sup>3,22</sup> John D. Burke,<sup>1</sup> Matthew Herzog,<sup>4</sup> Anju Shukla,<sup>5</sup> Katharina Steindl,<sup>6</sup> Ascia Eskin,<sup>4</sup> Siddaramappa J. Patil,<sup>7</sup> Pascal Joset,<sup>6</sup> Hane Lee,<sup>8</sup> Lisa J. Garrett,<sup>9</sup> Tadafumi Yokoyama,<sup>1</sup> Nicholas Balanda,<sup>10</sup> Steven P. Bodine,<sup>1</sup> Nathaniel J. Tolman,<sup>10</sup> Patricia M. Zerfas,<sup>11</sup> Allison Zheng,<sup>4</sup> Georgia Ramantani,<sup>12</sup> Katta M. Girisha,<sup>5</sup> Cecilia Rivas,<sup>9</sup> Pujar V. Suresh,<sup>13</sup> Abdel Elkhouloun,<sup>14</sup> Hessa S. Alsaif,<sup>2</sup> Salma M. Wakil,<sup>2</sup> Laila Mahmoud,<sup>15</sup> Rehab Ali,<sup>15</sup> Michaela Prochazkova,<sup>16</sup> Undiagnosed Diseases Network members, Ashok B. Kulkarni,<sup>16</sup> Tawfeq Ben-Omran,<sup>15</sup> Dilek Colak,<sup>17</sup> H. Douglas Morris,<sup>18</sup> Anita Rauch,<sup>6</sup> Julian A. Martinez-Agosto,<sup>4</sup> Stanley F. Nelson,<sup>4,8</sup> Fowzan S. Alkuraya,<sup>2,19,20,\*</sup> William A. Gahl,<sup>1,10,21</sup> and May Christine V. Malicdan<sup>1,10,21,\*</sup>

Neurodevelopmental disorders (NDD) are genetically and phenotypically heterogeneous conditions due to defects in genes involved in development and function of the nervous system. Individuals with NDD, in addition to their primary neurodevelopmental phenotype, may also have accompanying syndromic features that can be very helpful diagnostically especially those with recognizable facial appearance. In this study, we describe ten similarly affected individuals from six unrelated families of different ethnic origins having bi-allelic truncating variants in *TMEM94*, which encodes for an uncharacterized transmembrane nuclear protein that is highly conserved across mammals. The affected individuals manifested with global developmental delay/intellectual disability, and dysmorphic facial features including triangular face, deep set eyes, broad nasal root and tip and anteverted nostrils, thick arched eye brows, hypertrichosis, pointed chin, and hypertelorism. Birthweight in the upper normal range was observed in most, and all but one had congenital heart defects (CHD). Gene expression analysis in available cells from affected individuals showed reduced expression of *TMEM94*. Global transcriptome profiling using microarray and RNA sequencing revealed several dysregulated genes essential for cell growth, proliferation and survival that are predicted to have an impact on cardiotoxicity hematological system and neurodevelopment. Loss of *Tmem94* in mouse model generated by CRISPR/Cas9 was embryonic lethal and led to craniofacial and cardiac abnormalities and abnormal neuronal migration pattern, suggesting that this gene is important in craniofacial, cardiovascular, and nervous system development. Our study suggests the genetic etiology of a recognizable dysmorphic syndrome with NDD and CHD and highlights the role of *TMEM94* in early development.

## Introduction

Human brain development is a complex dynamic process that begins in the third gestational week and extends at least through early adulthood.<sup>1</sup> Neurodevelopmental disorders (NDD) refer to impaired development and function

of the central nervous system, which include developmental delay, intellectual disability (ID), learning disabilities, autism spectrum disorders, motor and tic disorders, and communication disorders.<sup>2</sup> NDD can be accompanied by non-central nervous system defects, e.g., congenital heart defects (CHD) and facial dysmorphism, in a

<sup>1</sup>Section of Human Biochemical Genetics, Medical Genetics Branch, National Human Genome Research Institute, National Institutes of Health, Bethesda, MD 20892, USA; <sup>2</sup>Department of Genetics, King Faisal Specialist Hospital and Research Center, Riyadh 11211, Saudi Arabia; <sup>3</sup>Department of Pediatric Genetics, Amrita Institute of Medical Sciences and Research Center, Kerala 682041, India; <sup>4</sup>Department of Human Genetics, David Geffen School of Medicine, University of California, Los Angeles, CA, 90095, USA; <sup>5</sup>Department of Medical Genetics, Kasturba Medical College, Manipal Academy of Higher Education, Manipal 576104, India; <sup>6</sup>Institute of Medical Genetics, University of Zurich, Schlieren-Zurich 8952, Switzerland and radiz – “Rare Disease Initiative Zurich, Clinical Research Priority Program for Rare Diseases University of Zurich,” Zurich 8032, Switzerland; <sup>7</sup>Mazumdar Shaw Medical Center, Narayana Health City, Bangalore 560099, India; <sup>8</sup>Department of Pathology and Laboratory Medicine, David Geffen School of Medicine, University of California, Los Angeles, CA, 90095, USA; <sup>9</sup>Embryonic Stem Cell and Transgenic Mouse Core, National Human Genome Research Institute, National Institutes of Health, Bethesda, MD 20892, USA; <sup>10</sup>NIH Undiagnosed Diseases Program, NHGRI and the Common Fund, National Institutes of Health, Bethesda, MD 20892, USA; <sup>11</sup>Office of Research Services, Division of Veterinary Resources, NIH, Bethesda, MD 20892, USA; <sup>12</sup>Neuropediatrics, University Children’s Hospital, Zurich 8032, Switzerland; <sup>13</sup>Department of Pediatric Cardiology, Narayana Institute of Cardiac Sciences, Bangalore 560099, India; <sup>14</sup>Cancer Genetics and Comparative Genomics Branch, National Human Genome Research Institute, National Institutes of Health, Bethesda, MD 20892, USA; <sup>15</sup>Clinical and Metabolic Genetics, Department of Pediatrics, Hamad Medical Corporation, Doha, PO Box 3050, Qatar; <sup>16</sup>Functional Genomics Section, National Institute of Dental and Craniofacial Research, National Institutes of Health, Bethesda, MD 20892, USA; <sup>17</sup>Department of Biostatistics, Epidemiology, and Scientific Computing, King Faisal Specialist Hospital and Research Center, Riyadh 11211, Saudi Arabia; <sup>18</sup>Mouse Imaging Facility, National Institute of Neurological Disorders and Stroke, National Institutes of Health, Bethesda, MD 21042, USA; <sup>19</sup>Human Genome Program, King Abdulaziz City of Science and Technology, Riyadh 11442, Saudi Arabia; <sup>20</sup>Department of Anatomy and Cell Biology, College of Medicine, Alfaisal University, Riyadh 11533, Saudi Arabia; <sup>21</sup>Office of the Clinical Director, National Human Genome Research Institute, National Institutes of Health, Bethesda, MD 20892, USA

<sup>22</sup>These authors contributed equally to this work

\*Correspondence: [falkuraya@kfshrc.edu.sa](mailto:falkuraya@kfshrc.edu.sa) (F.S.A.), [malicdanm@mail.nih.gov](mailto:malicdanm@mail.nih.gov) (M.C.V.M.)  
<https://doi.org/10.1016/j.ajhg.2018.11.001>

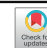

recognizable syndromic pattern, is clinically and genetically heterogeneous.<sup>3,4</sup> The genes implicated with both NDD and CHD are generally involved in early embryonic stages of nervous and neurovascular development including brain vascularization, vessel maturation and branching, development of blood brain barrier, neural proliferation and migration, and synapse formation.<sup>2,5</sup> For instance, neural crest cell (NCC) differentiation and migration are coordinated by a large array of genes function in a precisely orchestrated manner.<sup>6</sup> NCC are multipotent cells derive into multiple cell types including glial cells, connective tissues, craniofacial cartilage and bone, pigmented cells of skin, and cardiac septa development. Thus, perturbation of genes associated with NCC development and function leads to multi organ abnormalities including brain, craniofacial and cardiac development.<sup>7</sup> Owing to the increased utilization of next generation sequencing, there has been a recent surge in the identification of genetic etiologies of NDD.<sup>8–12</sup> However, achieving a definitive genetic diagnosis is still incomplete because of the wide range of phenotypic and genotypic etiologies and a large number of remaining unknown genetic causes.<sup>13–15</sup>

In this study, we describe recessive truncating variants in *TMEM94* in ten individuals who manifested with NDD, CHD, and similar facial gestalt identified through collaborative efforts and matchmaking platforms.<sup>16</sup> Analysis of primary cells from affected individuals showed reduced expression of *TMEM94*. Further global transcription profiling showed dysregulation of several genes related to cell survival and cell growth and proliferation, among others. Deletion of *Tmem94* in mice by CRISPR-Cas9 led to impaired embryonic development, especially neuro and cardiovascular development. The overlap between phenotypes observed in the affected individuals and those in homozygous mutant mice embryos emphasize the role of this gene in brain, craniofacial, and cardiac development.

## Material and Methods

### Human Subjects and Genetic Analysis

Affected members of family 1 were evaluated at Amrita Institute of Medical Sciences and Research Center, Kerala, India. Informed consent for research was obtained from parents under the protocol 76-HG-0238 (diagnosis and treatment of patients with inborn errors of metabolism or other genetic disorders) approved by the Institutional Review Board of the NIH, National Human Genome Research Institute (NHGRI). Affected individuals from families 2 and 6 were recruited from Qatar into an IRB-approved protocol (KFSHRC RAC#2080006). Written informed consent was obtained from the parents to participate in these studies. The proband from family 3 was enrolled in the NIH Undiagnosed Diseases Network<sup>17,18</sup> under the clinical protocol 15-HG-0130, “Clinical and Genetic Evaluation of Patients with Undiagnosed Disorders Through the Undiagnosed Diseases Network,” approved by the NHGRI Institutional Review Board. The proband from family 4 was recruited from Mazumdar Shaw Medical Center, Bangalore, India after written informed consent obtained by the institute

from parents for the publication of clinical information and photographs. For family 5, ethical approval was obtained from the ethical commission of the Canton of Zurich and written consent was provided by the affected individuals and parents including publication of facial photographs. SNP microarray, whole-exome sequencing (WES) or whole-genome sequencing (WGS) were employed to identify the genetic etiology in each family and the detailed methodologies used are described in the [Supplemental Methods](#).

### Gene Expression Studies and Splice Analysis

Immortalized lymphoblastoid cell lines from all the affected members from family 2 and skin-derived fibroblasts from the proband of family 3 were available for gene expression studies. Lymphoblastoid cell lines and fibroblasts were maintained as previously described.<sup>19,20</sup> Total RNA was extracted from cultured cell lines using RNeasy Mini Kit (QIAGEN, Valencia, CA, USA) according to the manufacturer’s guidelines. The extracted RNA was reverse transcribed (High Capacity RNA to cDNA synthesis kit, Applied Biosystems, Waltham, CA, USA) for cDNA sequencing and expression studies. For splice site analysis in family 3, PCR products were amplified using primers flanking the splice site and cloned into TOPO vector according to manufacturer’s protocol (Invitrogen). Recombinant colonies were selected using blue white screening and sequenced using vector specific M13 primers (Table S1). For family 5, direct sequencing was performed after PCR amplification using cDNA-specific primers flanking the intronic variant. For quantitative real-time PCR, primers specific to the longest isoform of human *TMEM94* (NM\_001321148.1) and *POLR2A* were amplified using Power SYBR Green PCR master mix, monitored, and analyzed as described.<sup>20</sup> To understand the effect of the truncating variants in *TMEM94* on global gene expression, we performed gene expression microarray of one affected (Family 2-II.3) versus four gender matched healthy controls as previously described.<sup>21</sup> Significantly dysregulated genes were defined as those with absolute fold change (FC) > 1.5 and adjusted Welch’s t test p value < 0.05.

### RNA Sequencing

RNA from lymphoblastoid cell lines of all the affected members of family 2 (2-II.1, 2-II.2, and 2-II.3) and two control cell lines were extracted using Maxwell RSC Instrument (Promega) according to manufacturer’s guidelines. After the quality control procedures, mRNA was enriched using oligo(dT) beads and then fragmented randomly in fragmentation buffer, followed by cDNA synthesis using random hexamers and reverse transcriptase. After first-strand synthesis, a custom second-strand synthesis buffer (Illumina) was added with dNTPs, RNase H, and *Escherichia coli* polymerase I to generate the second strand by nick-translation. The final cDNA library was used after a round of purification, terminal repair, A-tailing, ligation of sequencing adapters, size selection, and PCR enrichment. The libraries were read using Illumina HiSeq and the raw quality-filtered FASTQ files were then aligned to the human reference genome build GRCh37/hg19 using STAR version 2.5.3a in manual two-pass mapping mode.<sup>22</sup> Low quality reads (average Phred-scaled base call quality < 20) from the RNA sequence data were removed using Trimmomatic.<sup>23</sup> GENCODE v19 annotation was used for genome annotation on the fly while preparing STAR genome indices for the alignment.<sup>24</sup> Gene-level raw

read counts were determined using feature Counts from the Subread package with a RefSeq transcript annotation set consisting of 27,090 gene features.<sup>25–27</sup> Differential expression analysis was performed using DESeq2 within the SARTools R package.<sup>28,29</sup> Differentially expressed genes with Benjamini-Hochberg (BH) adjusted false discovery rates of < 0.05 were included in an Ingenuity Pathway Analysis.<sup>30,31</sup>

For family 3, RNA was extracted from blood and skin fibroblast using QIAGEN RNeasy Plus Micro Kit. Quantification and quality was assessed using Qubit 3.0 Fluorometer and Agilent bioanalyzer. A total of 1 µg RNA was submitted to the UCLA Neuroscience Genomics Core (UNGC) for library construction and RNA sequencing. Sequencing libraries were generated using Illumina TruSeq Stranded Total RNA Ribo-Zero Gold. Sequencing was performed to generate on average ~65 million 69 base paired-end reads on the Illumina HiSeq 4000. FASTQ files were aligned using STAR-2.5.2b two pass Mode to the Ensembl genome release 75. Quality was assessed using RNA-SeQC v1.1.8 and gene expression was quantified with Cufflinks v2.2.1. BAM files were loaded in IGV (Integrative Genomics Viewer; <https://software.broadinstitute.org/software/igv/>) to generate the sashimi plot of the splice alteration.

### Generation and Characterization of *Tmem94* Knock-Out Mice

All experiments in mice were approved by the NIH NHGRI Animal Care and Use Committee under the protocol G-17-5 (Mouse Models of Rare and Undiagnosed Diseases). For generating the knock out mice, we used CRISPR/Cas9 technology to introduce a frameshift in the early codons of mouse *Tmem94*. Two single stranded oligos targeting exon 4 were designed using online CRISPRscan software,<sup>32</sup> with no putative off-targets. The oligos contained the T7 promoter, target sequence, and a universal reverse primer binding site (Table S1). We annealed each single stranded oligo with a universal reverse primer and extended it using a proof reading enzyme (QuickChange II XL Site directed mutagenesis kit, Agilent Technologies, CA, USA). The double strand products (~150 bp) were in-vitro transcribed (HiScribe T7 High Yield RNA Synthesis Kit, NEB, MA, USA) and the synthesized gRNAs were purified (MEGAclear Transcription Clean-Up Kit, Ambion, MA, USA) according to the manufacturer's instructions. The quantity of the sgRNAs was assessed on a NanoDrop ND-1000 spectrophotometer (Thermo Fisher Scientific, Wilmington, DE, USA) and loaded onto 2% agarose gels to check quality. *Tmem94* sgRNAs and spCas9 mRNAs (from Trilink Biotechnologies, San Diego, CA, #L-6008) were microinjected into the pronuclei of mouse zygotes as described.<sup>33</sup> Successfully injected C57BL6/J zygotes were surgically implanted into pseudo pregnant recipient CB6F1 female mice. Tails from each embryo were genotyped by PCR and Sanger sequencing using specific primers (Table S1). For harvesting embryos, pregnant mice were euthanized using CO<sub>2</sub> asphyxiation at 12.5, 15.5, and 18.5 days of gestation, dissected, and embryos were collected for genotyping and photography. Embryo images were taken with a stereomicroscope (Axio Zoom V16, Zeiss) attached to a light microscope. To study the expression of *Tmem94* in knockout mice, we cultured mouse embryonic fibroblasts in DMEM supplemented with 10% fetal bovine serum<sup>20</sup> and extracted RNA and synthesized cDNA as described above. The longest protein coding isoform of mouse *Tmem94* (NM\_028014.3) was amplified using Power SYBR Green PCR using *Polr2a* as a housekeeping gene to normalize the results (primers shown in Table S1).

### Magnetic Resonance Imaging and Computed Tomography

Magnetic resonance images were acquired using a Bruker Biospin Avance III microimaging system using 14.1 T magnet, Paravision 5.1 software, and Micro 2.5 imaging gradients. The embryos were immersed in 0.5% (v/v) Magnetvist (aq) solution (Bayer Healthcare Pharmaceuticals, Lancaster, PA) for 10 days to improve MRI contrast and image resolution. Ex-vivo MRI was performed on a Bruker 14.1T MR imaging spectrometer (Bruker Biospin, Billerica, MA, USA) using a spoiled FLASH technique<sup>34</sup> with TR/TE = 75/8 ms and 2 signal averages. The resulting 3D images were acquired and processed to a resolution of 49 microns isotropic or smaller. For CT, the embryos were fixed with 4% paraformaldehyde aqueous solution for 2 weeks prior to scanning. The embryos were affixed to a closed-cell Styrofoam support bed for centering in the CT field of view and covered with a Parafilm M (Bemis NA, Neenah, WI, USA) film membrane to prevent movement from excessive drying during CT scan. The embryos were scanned on a Bruker Micro-CT Skyscan 1176 *in vivo* Micro CT (Bruker, Inc. Billerica, MA, USA) with a 0.7-degree angular step, and 2 frame averages per step. The X-ray source was set to a current of 177 microamps, voltage of 45 kVp, and a 0.2 mm Al filter for spectral hardening. Images were reconstructed using the Bruker Micro CT Recon software with an isotropic image resolution of 18 µm over a FOV of 35 mm. The radiographs of craniofacial regions of mouse embryos were acquired at 35kV using Faxitron X-ray and Fuji computed radiography system with a digital camera attached.

### Histological Staining and Microscopy

For tissue analysis, the whole embryo and dissected brains were fixed in 10% formalin and embedded in paraffin using standard methods. Slides 10 µm thick were further processed for staining either standard Nissl or Masson trichrome staining. Bright field images of stained tissues were collected using a Zeiss AxioObserver Z1 widefield microscope equipped with a 20× plan-apochromat (N.A. 0.45) objective lens, a motorized scanning stage, and an AxioCam MRc5 color CCD camera.

## Results

### Identification of a Recognizable Syndrome of NDD, CHD, and Facial Dysmorphism in Multiple Proband from Unrelated Families

#### Family 1

Proband 1 (1-II.4 in Figure 1A) is an 8-month-old male infant from Oman and the 4<sup>th</sup> child of consanguineous parents. He was diagnosed antenatally with Tetralogy of Fallot and pulmonary atresia and born at 32 weeks of gestation weighing 2.9 kg (> 97<sup>th</sup> centile). He underwent a Blalock-Taussig shunt at 1 month of age and intra cardiac repair with right ventricular and pulmonary artery conduit at 8 months of age. He was referred to the department of genetics for evaluation of dysmorphic features. On examination at 8 months of age, he presented with mild motor developmental delay; he could sit with support and reach for objects but was not able to transfer objects from one hand to another. Weight was 8.3 kg (10-25<sup>th</sup> centile), height 73 cm (75-90<sup>th</sup> centile) and head circumference 42 cm (< 3<sup>rd</sup> centile). Dysmorphic features included



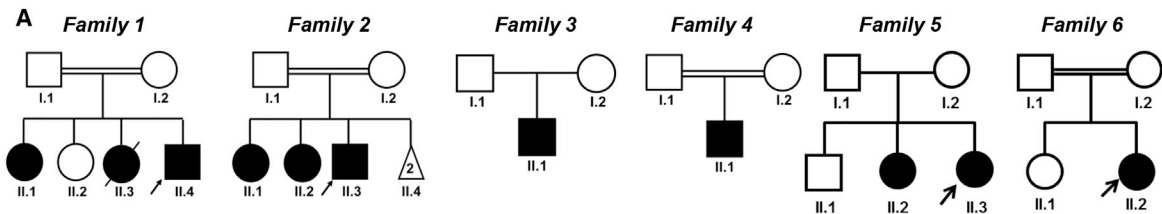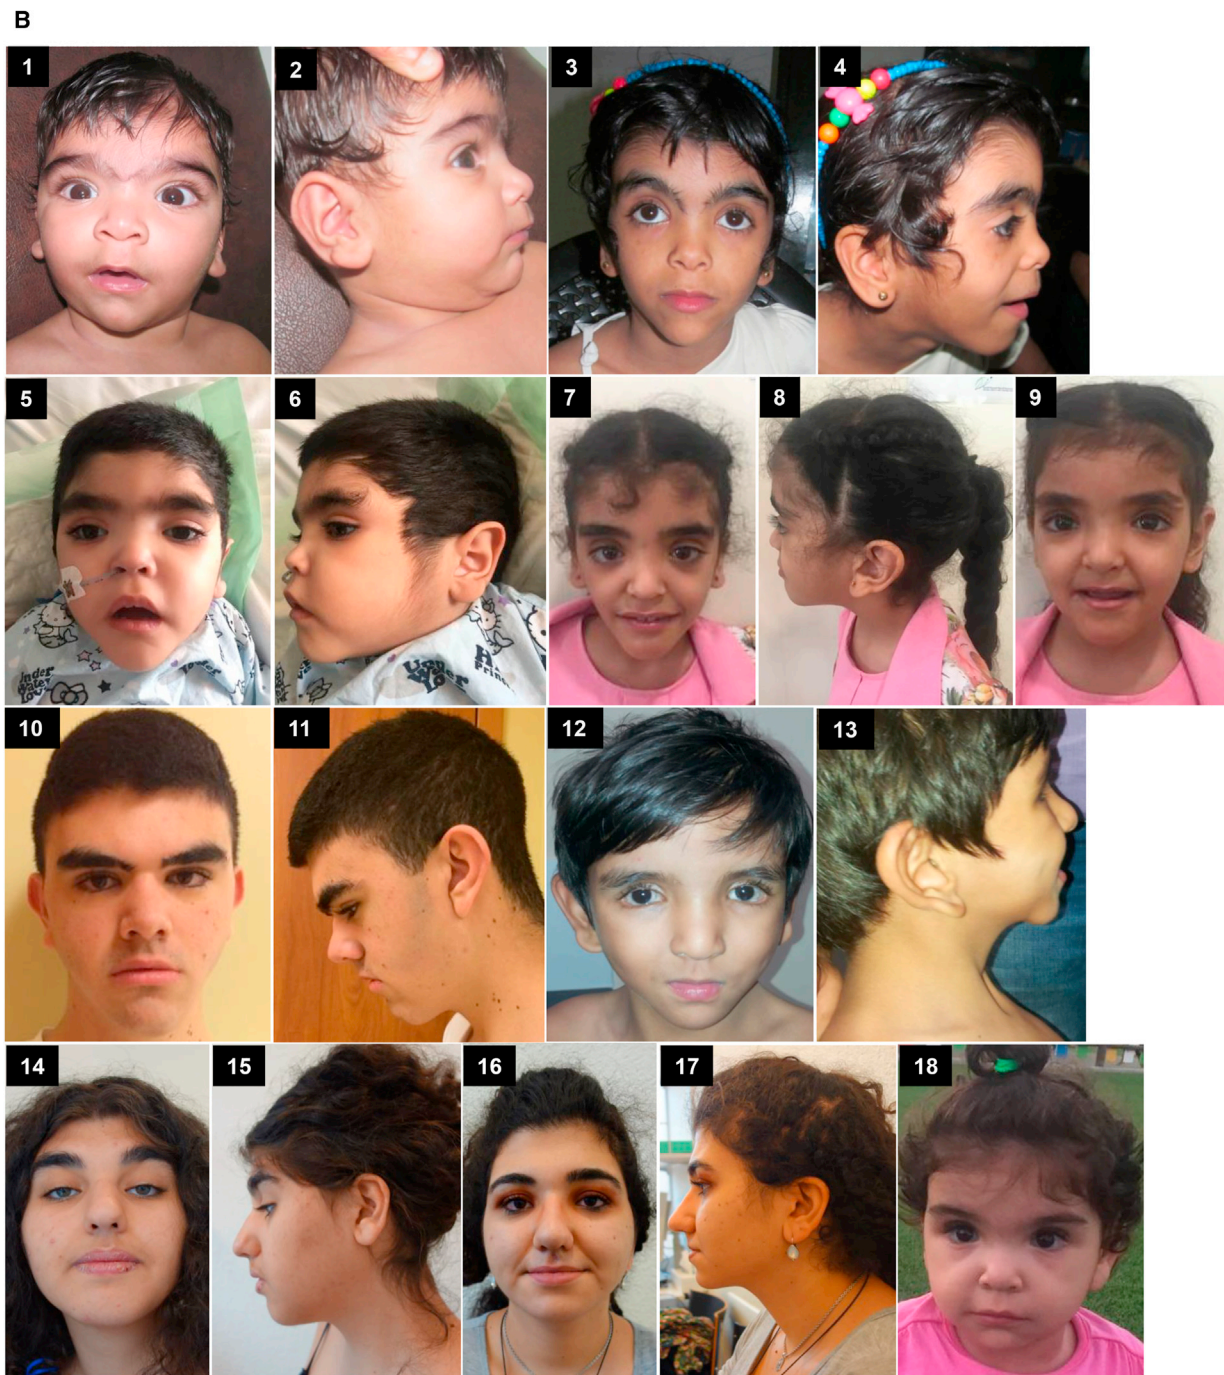

**Figure 1. Pedigree and Clinical Features of the Families**

(A) Pedigree of the six families included in the study. Filled objects indicate affected status and arrows indicate the probands.

(B) Proband of family 1 (1-II.4) is shown with arched eyebrows, synophrys, left convergent strabismus, flat nasal bridge, hypertrichosis, long philtrum, thin upper vermillion, and low set pinnae with prominent lobules (1 and 2). His elder sibling (1-II.1) has inverted triangular face, thick arched eyebrows, hypertelorism, flat nasal bridge, long philtrum, thin upper vermillion and pointed chin and low set pinnae with prominent lobules (3 and 4). Proband of family 2 (2-II.3) shown with short low anterior hairline, synophrys with thick eyebrows, long eyelashes, hypertelorism, broad flat nasal bridge, upturned nose, triangular upper lip, prominent chin, and low set ears with

(legend continued on next page)

synophrys, thick arched eyebrows, hypertrichosis, left convergent squint, flat nasal bridge, short nose, long philtrum with thin upper vermillion, low set ears with prominent ear lobules, and widely spaced nipples (Figures 1B, 1–2, and Figure S1, 1). Cyanosis and clubbing of the fingers and toes (Figure S1, 2–3), which were most likely due to his congenital heart disease, were noted. His array CGH was normal. Ultrasound evaluation of the abdomen was normal. On re-evaluation at 24 months of age, receptive language was delayed at 19 months and expressive language at 15 months; speech therapy was initiated. Otoacoustic emission analysis was normal. The eldest sister (1-II.1 in Figure 1A) presented with similar facial features. At 6 years of age, she had global developmental delay and poor scholastic performance. She had an inverted triangular face, thick arched eyebrows, hypertrichosis, mid-facial hypoplasia, short nose with flat nasal bridge, hypertelorism, low set pinnae with prominent ear lobules, long flat philtrum with a thin upper vermillion, and pointed chin (Figures 1B, 3–4). Echocardiogram revealed an atrial septal defect. Her fingers and toes were long (Figures S1, 4–5). Karyotype analysis showed 46, XX, 16qh+. MRI of the brain of both the affected siblings in family 1 were normal (Figures S1, 6–7). A 4.5-year-old elder female sibling (Figure 1A-II.2) was unaffected; another elder female sibling (Figure 1, A-II.3) died with pneumonia at 8 months of age; from the information provided by the parents, she might also be affected because she had similar facial features and an atrial septal defect.

#### Family 2

Proband 2 (2-II.3 in Figure 1A) is a three-year-old boy born from a consanguineous Qatari couple who had two spontaneous miscarriages in the first trimester. Pregnancy was complicated by gestational diabetes managed with insulin. Birth was by normal vaginal delivery at 38 weeks of gestation with a birth weight of 4.02 kg (85<sup>th</sup> centile), head circumference of 35 cm (50<sup>th</sup> centile), and length of 55 cm (98<sup>th</sup> centile). As an infant, he developed mild respiratory distress that responded to oxygen supplementation by nasal cannula. Echocardiogram showed a small PFO with left to right shunt, multiple small VSDs with left to right shunt; all closed spontaneously on follow up. He had recurrent viral illnesses documented by PCR of respiratory secretions to be due to human metapneumo-, adeno-, rhino- and bocaviruses. He developed neutropenia, which was attributed to phenytoin therapy for episodes of generalized tonic-clonic seizures started at 2 years of age with abnormal EEG. During infancy, he initially had generalized hypotonia, but at present he has truncal hypotonia

and appendicular hypertonia with brisk reflexes and ankle clonus. Dysmorphic features include short forehead with a low anterior hair line, synophrys with thick eyebrows, long eyelashes, hypertelorism (interpupillary distance at 20 months of age was 6.5 cm, 97<sup>th</sup> centile), broad flat nasal bridge, upturned nose, triangular upper lip, prominent chin, and low set ears with prominent lobules and short neck (Figures 1B, 5–6). MRI of the brain showed bilateral symmetrical restricted diffusion and high T2 signal intensity of the cerebral white matter, mainly the U fibers, subcortical white matter and external capsule (data not shown), with relative sparing of internal capsule, corona radiata, centrum semi ovale and corpus callosum. Similar changes affected the dentate nucleus bilaterally. The brainstem and basal ganglia had normal signal intensity and the ventricular system appeared normal.

The eldest sister of Proband 2 (2-II.1 in Figure 1A) is an 8-year-old girl delivered preterm at 30 weeks of gestation after an uneventful pregnancy. At birth, her weight was 1.77 kg (90<sup>th</sup> centile), head circumference was 26.5 cm (50<sup>th</sup> centile), and length was 45.5 cm (> 97<sup>th</sup> centile). She was admitted to NICU for 1 month due to respiratory distress syndrome and neonatal jaundice. Like her brother, she initially had generalized hypotonia. She had speech delay, some hyperactive behavior and learning difficulties. She presented with the same dysmorphic features as her brother, i.e., thick eyebrows, hypertelorism, broad nasal bridge and nasal tip, prominent posteriorly rotated ears and big ear lobules in addition to prominent chin (Figures 1B, 7–8). The other sister of Proband 2 (2-II.2 in Figure 1A) is a 6-year-old girl born term after an uneventful pregnancy with a birth weight of 4.36 kg (95<sup>th</sup> centile), head circumference of 37 cm (98<sup>th</sup> centile), and length of 54 cm (98<sup>th</sup> centile). She has mild scoliosis of the dorsal spine and normal motor development after an initial delay, but had speech delay and learning difficulties. She has pectus excavatum, and the same dysmorphic features as her two affected siblings (Figure 1B, 9). MRI of the brain was normal.

#### Family 3

Proband 3 (3-II.1 in Figure 1A) is a 16-year-old male from a non-consanguineous couple of European American ethnicity. He was born at 36 weeks of gestation by assisted vaginal delivery; the pregnancy was complicated by pre-eclampsia. APGAR scores were 7 (1 minute) and 9 (5 minutes); he had severe hypotonia and was in the NICU for 4 weeks due to a VSD, ASD, and PDA. The PDA and VSD spontaneously closed without intervention. At age 2 months, the proband underwent surgery for

---

prominent lobules (5 and 6). His eldest sister (2-II.1) has thick eyebrows, hypertelorism, broad nasal bridge, nasal tip, posteriorly rotated prominent ears, and big ear lobules (7 and 8). His elder sister (2-II.2) has thick eyebrows, broad nasal bridge, nasal tip, and big ear lobules (9). In family 3, the proband (3-II.1) is shown with triangular face, pointed chin, thick arched eyebrows, short nose, long philtrum (10) and posteriorly rotated prominent ear lobules (11). The proband in family 4 is shown with triangular face with pointed chin, thick arched eye brows, short nose, long philtrum (12) and prominent posteriorly rotated ear lobules (13). In family 5, the elder sibling of the proband (5-II.2) (14–15) and the proband (5-II.3) (16–17) are shown with similar facial gestalt of thick arched eyebrows, low set ears with under folded helix, prominent nose, short philtrum, prominent cupid bow upper lip, and increased volume of lip vermillion. Proband of family 6 is shown with thick arched eye brows, deep set eyes, long philtrum, and pointed chin (18).

---



laryngomalacia. At age 3 years he had his ASD surgically repaired. At age 6 years, Proband 3 had a fundoplication for severe GERD, pyloroplasty, inguinal hernia repair, and the removal of a Mullerian duct remnant. At age 12 years he had contralateral hernia repair and at age 15 he had laparoscopic surgery to remove an abdominal mesenteric cyst. Additionally, at age 15, he had a bony decompression and C1 laminectomy for his Chiari 1 malformation.

His early gross developmental milestones were delayed in the first 2 years of life; he sat at 8 months and walked at 19 months. He was found to have an expressive language delay. Neuropsychological testing at age 16 (WASI-II, WAIS-IV, WRAT-4, Vineland 3, Conners-3 parent form, BRIEF-2, and SCQ) found that he had a specific learning disability due to psychological processing deficits in the areas of sensory-motor and visual perception. Additional findings included deficits in cognitive abilities, word reading, reading comprehension, spelling, math computation, brief attention, working memory, number sense, and communication in the low or below average range. Socialization skills were found to be intact, but he struggles to socialize with similarly functioning peers. On physical exam, Proband 3 is above the 90<sup>th</sup> percentile for height and weight, has macrocephaly, a triangular face, hypertrichosis, a pointed chin, synophrys with thick arched eyebrows, a short nose with a flat nasal bridge, a long philtrum, and posteriorly rotated ears with prominent ear lobes (Figure 1B, 10–11). Other pertinent findings include strabismus, optic glioma, dilation of the ascending aorta, severe scoliosis (spine X-rays detected a 48-degree S-shaped lumbar scoliosis at age 14 years old), arachnodactyly with large hands, generalized hypotonia, pectus excavatum, and numerous boggy subcutaneous lesions (Figure S1, 8–11). MRI evaluations have identified a Chiari 1 malformation and a delayed myelination pattern (at age 2 years), and a T2 hyperintense lesion involving the left orbital gyrus and a stable Chiari 1 malformation (at ages 14 and 15 years old). Spinal MRI identified a hyperintense signal involving the vertebral body of T7 that could represent an intraosseous hemangioma, dextrothoracolumbar scoliosis, and a Chiari 1 malformation.

#### Family 4

Proband 4 (4-II.1 in Figure 1A) is a 17-month-old male born to third degree consanguineous parents who was referred with history of congenital heart disease, developmental delay and delayed speech. He was born by a lower segment caesarean section due to history of decreased fetal movements and fetal distress. His birth weight was 4.6 kg (99<sup>th</sup> centile). At 6 months of age, he was diagnosed with congenital heart disease due to complaints of cyanosis and recurrent respiratory infections. Echocardiography showed Tetralogy of Fallot with hypoplastic pulmonary annulus, large perimembranous misaligned ventricular septal defect and large secundum atrial septal defect. On examination, he has facial dysmorphism characterized by inverted triangular face, thick eyebrows with

thin medial extension, down slant palpebral fissures, lateral third eversion of lower eyelids, wide nasal bridge, small nose, low set posteriorly rotated ears with large uplifted ear lobules, long philtrum, small mouth, thin vermilion of upper lip and pointed chin (Figure 1B, 12–13). Other clinical features include webbed neck, low set widely spaced nipples, fetal finger pads, shawl scrotum, distal hypospadias, bilateral undescended testes, overlapping toes, and long great toes (Figure S1, 12–15). At 17 months of age, his head circumference was 47 cm (60<sup>th</sup> centile) and his length of 88 cm (> 97<sup>th</sup> centile). At the age of 3 years 5 months, the head circumference was 50.2 cm (75<sup>th</sup> centile), height was 108 cm (> 97<sup>th</sup> centile) and weight was 17 kg (90–95<sup>th</sup> centile). The rest of the systemic examination was unremarkable. Giemsa-banded chromosome analyses and chromosome microarray were normal.

#### Family 5

Proband 5 (5-II.3 in Figure 1A) was a 16-year-old girl with mild developmental delay and macrocephaly born to non-consanguineous healthy Turkish parents, originating from two different small villages. She was born at 37 5/7 weeks of gestation by Caesarean section with a weight of 4.17 kg (> 97<sup>th</sup> centile), length of 52 cm (> 75<sup>th</sup> centile), and unreported head circumference. At two weeks of age, she was diagnosed with an ASD, a VSD, and a double outlet right ventricle without a pulmonic stenosis, which were surgically corrected. Her motor development was mildly delayed with unsupported sitting at 12 months and independent walking at 17 months. Her speech development was also delayed and characterized by mispronunciation of words and stuttering. Social skills were considered within normal limits. Her facial features included apparently bitemporal narrowing with normal measurements (50<sup>th</sup> centile) with a low anterior hairline, full and curly hair, hypertrichosis on the back and extremities, synophrys with thick arched eyebrows, long eyelashes, upslanted palpebral fissures, ptosis, rather wide eye distance (interpupillary distance of 6.1cm, which is +0.7SD for Turkish population<sup>35</sup>), high nasal root and bridge and broad nasal tip, anteverted nares short and deep philtrum, thick upper and lower lip vermilion, under folded helices, and large ear lobes and a triangular facial shape (Figure 1B, 14–15). Her palms were narrow (palm width/length ratio –3SD) with long slender fingers (97<sup>th</sup> centile). Her feet showed a 2–3 cutaneous toe syndactyly bilaterally. At the age of 13 years she developed focal epileptic seizures with impaired awareness and rare evolution to bilateral tonic-clonic seizures, which are partially controlled by lamotrigine treatment. At the age of 18 years she attended a special education school due to learning disability and short attention span. She showed no obvious behavioral issues and was described as very sensitive and shy. Formal testing at the age of 16 years revealed an IQ of 58. For cosmetic reasons she regularly epilates the synophrys. Hearing tests done after birth and at 8.5 years were normal. Microarray analysis using an Affymetrix

Cytoscan HD array at a 20kb resolution showed no abnormalities.

Individual 5-II.2, the elder sister of individual 5-II.3, was born after three miscarriages at 37 weeks of gestation by Cesarean section due to prenatally detected omphalocele. Placentomegaly (1.1 kg) was reported but tissue for histology was unavailable. Her birthweight 3.78 kg is at 96<sup>th</sup> centile, birth length was 51 cm (50–75<sup>th</sup> centile), and head circumference (OFC) was 33.5 cm (25–50<sup>th</sup> centile). An atrioventricular septal defect (AVSD) and intestinal malrotation, which were initially suspected during the prenatal period, were confirmed at birth together with a PDA and parachute mitral valve. The congenital heart defect, omphalocele, and intestinal malrotation were successfully corrected surgically. In the neonatal period, she was noted to have large ear lobes and a hypertrichosis of the helix and of the back of the ear. She also had narrow palms (palm width/length ratio  $-2.75SD$ ) and slender fingers (97<sup>th</sup> centile) as well as long toes. Neonatally, she was suspected to be affected with Beckwith-Wiedemann-syndrome and a targeted surveillance strategy aimed to detect embryonal tumors was started, but no visceral involvement was detected. Standard karyotyping, DNA methylation studies of domain 1 (H19) on chromosome 11, and paternal uniparental disomy 11 testing revealed normal results at that time. Her psychomotor development was mildly delayed and she had difficulties in reading, writing, spelling, and reasoning. She had her menarche at 18 years but remained oligomenorrheic. During puberty, she had developed hypertrichosis of the face, arms and legs. For cosmetic reasons she regularly epilates unwanted body hair including the synophrys. She had strabismus and she wore eyeglasses because of high myopia. When she was reviewed at 24 years, she was taller than her targeted height (173cm,  $+1.5SD$ ; mother 25<sup>th</sup> centile, father 75–90<sup>th</sup> centile). She also had macrocephaly (OFC was 58.5cm,  $+2.35SD$ ; mother was on the 75–90<sup>th</sup> centile, while her father was on the 50<sup>th</sup> centile). At this age, she was overweight (weight of 97kg,  $2.89SD$ ). Her facial appearance was similar to that of her sister: she had bitemporal narrowing with normal measurements (50<sup>th</sup> centile) with a low anterior hairline, full and curly hair, cosmetically treated hypertrichosis on extremities and face and synophrys with thick arched eyebrows, long eyelashes, upslanted palpebral fissures, rather wide eye distance (interpupillary distance of 6.3cm, which is  $+1.23SD$  for Turkish population<sup>35</sup>), high nasal root and bridge and broad nasal tip, short and deep philtrum, thick upper and lower lip vermillion, prognathism, and open bite, small teeth and wide interdental spaces, under folded helices and large ear lobes and a triangular facial shape (Figure 1B, 16–17). Her hands were long and narrow with long fingers (palm width/length ratio  $-2.75SD$ ; palm length 12.6cm,  $> 97^{\text{th}}$  centile; middle finger length 9cm,  $> 97^{\text{th}}$  centile). She has numerous nevi and several cystic scalp formations that were removed surgically. Histopathology is available for one nevus only, which showed a melanocytic papillomatous nevus of pre-

dominantly dermal type. She attended a special education school and received training in housekeeping but was unemployed and lived with her parents.

#### Family 6

Proband 6 (6-II.2 in Figure 1A) is a 30-month-old girl from Egypt who presented with developmental delay, speech delay, and dysmorphic facial features. She was antenatally diagnosed to have complex congenital heart disease (double outlet right ventricle, ASD, VSD). She had a history of feeding and swallowing difficulties which is now resolved. She was born term by normal vaginal delivery. Her motor development was delayed with unsupported sitting at 16 months and currently can walk without support with wide based gait, can vocalize sounds but not words, and sometimes can understand simple orders. Her facial features include hairy forehead, thick eye brows, deep set eyes, hypertelorism (interpupillary distance of 8cm, 97<sup>th</sup> centile), depressed nasal bridge, low set ears, smooth philtrum, and thin upper lips (Figures 1B, 18). Her chromosome microarray was normal.

Detailed clinical data of all ten affected individuals from six families are summarized in Table 1.

#### Identification of *TMEM94* Bi-allelic Variants

Homozygosity/autozygosity mapping using SNP array, WES and/or WGS were used in all six families to identify the genetic etiology. None of the affected individuals from six families seems to have significant pathogenic copy number variants (CNVs) and in family 3, the non-consanguineous family, did not reveal any homozygous areas  $> 5Mb$  as expected. In family 5, although the parents denied consanguinity in the family history (Table 1), nine long stretches of homozygous areas and ethnic background (Turkish origin) suggest possible consanguinity (Table S2). Final analysis of all six families revealed bi-allelic truncating variants in *TMEM94* as a common genetic cause among other candidate genes (Table S3–S5). In online databases ExAC and gnomAD browser (see URL's), there are several potential loss-of-function variants occurring in heterozygosity in *TMEM94*, with allele frequency less than 0.00002 (1 or 2 allele counts in each ethnic population), but no healthy homozygotes, suggesting that the gene is highly intolerant to bi-allelic truncating variants. In view of the predicted deleteriousness of the *TMEM94* variant, segregation in the family, and similar phenotype in affected members of all six families, we considered this to be the best candidate gene. All the variants identified in *TMEM94* were Sanger validated for confirmation and family segregation (Figure S2). All the truncating variants are predicted to abolish the highly conserved C-terminal domain including cation P-type ATPase domains (Figure 2A). Alignment of human *TMEM94* (NP\_001308077.1) protein sequences with different species using Clustal Omega showed  $> 90%$  identity between human, chimpanzee, cattle, hamster, mouse, and dog; chicken, frog, and zebra fish showed 82%, 71%, and 69%, respectively. The C-terminal region of the

**Table 1. Clinical Highlights of Affected Family Members with *TMEM94* Variants**

| Features                                  | Family 1                  |                                   | Family 2                                                               |                                                                         |                                     | Family 3                                                           | Family 4                             | Family 5                                                   |                                                        | Family 6                                                                      |                                   |
|-------------------------------------------|---------------------------|-----------------------------------|------------------------------------------------------------------------|-------------------------------------------------------------------------|-------------------------------------|--------------------------------------------------------------------|--------------------------------------|------------------------------------------------------------|--------------------------------------------------------|-------------------------------------------------------------------------------|-----------------------------------|
| Position in the pedigree                  | II.1                      | II.4                              | II.1                                                                   | II.2                                                                    | II.3                                | II.1                                                               | II.1                                 | II.2                                                       | II.3                                                   | II.2                                                                          |                                   |
| <b>Ethnicity</b>                          | Omani                     |                                   | Qatari                                                                 |                                                                         |                                     | European American                                                  | Indian                               | Turkish                                                    |                                                        | Egypt                                                                         |                                   |
| <b>Consanguinity</b>                      | +                         |                                   | +                                                                      |                                                                         |                                     | No                                                                 | +                                    | Not reported, but parents from two small villages 3km away |                                                        | +                                                                             |                                   |
| <b>Variant in cDNA* and protein level</b> | c.2764C>T; p.Arg922*      |                                   | c.840del; p.Asp280Glufs*10                                             |                                                                         |                                     | c.2635dup; p.Met879Asnfs*18 and c.795-1G>C                         | c.2000_2004dup; p.Pro669Alafs*8      | c.4028+5G>A; p.Val1344*                                    |                                                        | c.3497delA; p.Asn1166Thrfs*84                                                 |                                   |
| <b>Age</b>                                | 8 years 7 months          | 8 months                          | 8 years                                                                | 6 years                                                                 | 3 years                             | 17 years                                                           | 3 years 5 months                     | 24 years                                                   | 18 years                                               | 30 months                                                                     |                                   |
| <b>Gender</b>                             | Female                    | Male                              | Female                                                                 | Female                                                                  | Male                                | Male                                                               | Male                                 | Female                                                     | Female                                                 | Female                                                                        |                                   |
| <b>Growth</b>                             | Birth weight              | Not available                     | 2.9 kg (born at 32 weeks age of gestation) (>97 <sup>th</sup> centile) | 1.77 kg (born at 30 weeks age of gestation) (90 <sup>th</sup> centile)  | 4.36 kg (95 <sup>th</sup> centile)  | 4.02 kg (born at 38 weeks of gestation) (85 <sup>th</sup> centile) | 4.65 kg (99 <sup>th</sup> centile)   | 4.6 kg (> 97 <sup>th</sup> centile)                        | 3.7 kg (96 <sup>th</sup> centile) Cesarean at 37 weeks | 4.17 kg (>97 <sup>th</sup> centile; +2.35SD) Cesarean section at 37 weeks 5/7 | Not available                     |
|                                           | Birth length              | Not available                     | Not available                                                          | 45.5 cm (born at 30 weeks age of gestation) (>97 <sup>th</sup> centile) | 54 cm (98 <sup>th</sup> centile)    | 55 cm (98 <sup>th</sup> centile)                                   | Not available                        | Not available                                              | 51cm (50-75 <sup>th</sup> centile)                     | 52cm (75 <sup>th</sup> centile)                                               | Not available                     |
|                                           | Birth head circumference  | Not available                     | Not available                                                          | 26.5 cm (born at 30 weeks age of gestation) (50 <sup>th</sup> centile)  | 37 cm (98 <sup>th</sup> centile)    | 35 cm (50 <sup>th</sup> centile)                                   | Not available                        | Not available                                              | 33.5cm (25-50 <sup>th</sup> centile)                   | Not available                                                                 | Not available                     |
|                                           | Recent height             | 120 cm (10 <sup>th</sup> centile) | 73 cm (75- 90 <sup>th</sup> centile)                                   | 129.6 cm (75.76 <sup>th</sup> centile)                                  | 124.3 cm (85 <sup>th</sup> centile) | 90 cm at 90 <sup>th</sup> centile                                  | 188.0 cm (96 <sup>th</sup> centile)  | 108 cm (>97 <sup>th</sup> centile)                         | 173cm (90-97 <sup>th</sup> centile; +1.5SD),           | 178.1cm (>97 <sup>th</sup> centile; +2.3 SD) at age 16yrs                     | 95 cm (96 <sup>th</sup> centile)  |
|                                           | Recent weight             | 19 kg (<3 <sup>rd</sup> centile)  | 8.3 kg (10- 25 <sup>th</sup> centile)                                  | 25.7kg (61.08 <sup>th</sup> centile)                                    | 22.4kg (65.7 <sup>th</sup> centile) | 17kg (88.74 <sup>th</sup> centile)                                 | 79.5kg (91 <sup>st</sup> centile)    | 17 kg (90-95 <sup>th</sup> centile)                        | 97kg (>97 <sup>th</sup> centile; 2.89SD)               | 89.1kg (>97 <sup>th</sup> centile; +2.51 SD) at age 16yrs                     | 14.3kg (86 <sup>th</sup> centile) |
|                                           | Recent head circumference | 50 cm (<10 <sup>th</sup> centile) | 42 cm (< 3 <sup>rd</sup> centile)                                      | 53.5 cm (90 <sup>th</sup> centile)                                      | 55 cm (97 <sup>th</sup> centile)    | 46.5 cm (77.38 <sup>th</sup> centile) (at 10 months)               | 63.5 cm (>100 <sup>th</sup> centile) | 50.2 cm (75 <sup>th</sup> centile)                         | 58.5cm (>97 <sup>th</sup> centile; +2.35SD)            | 58.5cm (97 <sup>th</sup> centile; +2.35SD)                                    | 52cm (99 <sup>th</sup> centile)   |

(Continued on next page)



| <b>Table 1. Continued</b>             |                                    |                  |                  |               |                      |                                                                                                                   |                                                                                                                                                                                         |                                                                  |                                                                  |                                                                                                                                              |               |
|---------------------------------------|------------------------------------|------------------|------------------|---------------|----------------------|-------------------------------------------------------------------------------------------------------------------|-----------------------------------------------------------------------------------------------------------------------------------------------------------------------------------------|------------------------------------------------------------------|------------------------------------------------------------------|----------------------------------------------------------------------------------------------------------------------------------------------|---------------|
| <b>Features</b>                       | <b>Family 1</b>                    |                  | <b>Family 2</b>  |               | <b>Family 3</b>      |                                                                                                                   | <b>Family 4</b>                                                                                                                                                                         | <b>Family 5</b>                                                  |                                                                  | <b>Family 6</b>                                                                                                                              |               |
| <b>Neurologic features</b>            | Motor delay (HP:0001270)           | +                | +                | +             | –                    | +                                                                                                                 | +                                                                                                                                                                                       | +                                                                | +                                                                | +                                                                                                                                            | +             |
|                                       | Learning disability (HP:0001328)   | +                | +                | +             | +                    | +                                                                                                                 | +                                                                                                                                                                                       | +                                                                | +                                                                | +                                                                                                                                            | +             |
|                                       | Speech delay (HP:0000750)          | +                | +                | +             | +                    | +                                                                                                                 | Expressive language delay                                                                                                                                                               | +                                                                | +                                                                | +                                                                                                                                            | +             |
|                                       | MRI o                              | Normal brain MRI | Normal brain MRI | Not available | Normal brain MRI     | Bilateral symmetrical restricted diffusion and high T2 signal intensity of the cerebral white matter of the brain | Chiari type I malformation and cortical-based mass in the left inferior frontal gyrus pars orbitalis (ganglioglioma or other low grade glial tumor). Spinal MRI -T7 hyperintense signal | Not available                                                    | Not available                                                    | Enhanced signal within both hippocampi in FLAIR cuts, signs of microhemorrhages, possibly linked to hemodynamic changes during heart surgery | Not available |
| <b>Facial features</b>                | Triangular face (HP:0000325)       | +                | +                | +             | +                    | +                                                                                                                 | +                                                                                                                                                                                       | +                                                                | +                                                                | +                                                                                                                                            | +             |
|                                       | Hypertrichosis (HP:0004554)        | +                | +                | +             | +                    | +                                                                                                                 | +                                                                                                                                                                                       | +                                                                | +                                                                | +                                                                                                                                            | +             |
|                                       | Pointed chin (HP:0000307)          | +                | +                | +             | +                    | +                                                                                                                 | +                                                                                                                                                                                       | +                                                                | +                                                                | +                                                                                                                                            | +             |
|                                       | Synophrys (HP:0000664)             | +                | +                | +             | +                    | +                                                                                                                 | +                                                                                                                                                                                       | +                                                                | +                                                                | +                                                                                                                                            | +             |
|                                       | Thick arched eyebrows (HP:0002553) | +                | +                | +             | +                    | +                                                                                                                 | +                                                                                                                                                                                       | +                                                                | +                                                                | +                                                                                                                                            | +             |
|                                       | Short nose (HP:0003196)            | +                | +                | +             | +                    | +                                                                                                                 | +                                                                                                                                                                                       | +                                                                | Prominent (HP:0000448)                                           | Prominent (HP:0000448)                                                                                                                       | +             |
|                                       | Flat nasal bridge (HP:0005280)     | +                | +                | +             | +                    | +                                                                                                                 | +                                                                                                                                                                                       | +                                                                | –                                                                | –                                                                                                                                            | +             |
|                                       | Long philtrum (HP:0000343)         | +                | +                | +             | +                    | +                                                                                                                 | –                                                                                                                                                                                       | +                                                                | HP:0000322 short philtrum                                        | HP:0000322 short philtrum                                                                                                                    | +             |
| Thin upper lip vermilion (HP:0000343) | +                                  | +                | +                | +             | Triangular upper lip | Not noted                                                                                                         | +                                                                                                                                                                                       | prominent cupid bow upper lip, increased volume of lip vermilion | prominent cupid bow upper lip, increased volume of lip vermilion | +                                                                                                                                            |               |

(Continued on next page)

**Table 1. Continued**

| Features                         | Family 1                                                                                                                             |                                                                                                                                        | Family 2                                                                                                          |                                                                                                | Family 3                                                       |                                                                                                                                                                                          | Family 4                                                                                                           | Family 5                                                                         |                                                                                                                                                                 | Family 6                                 |   |
|----------------------------------|--------------------------------------------------------------------------------------------------------------------------------------|----------------------------------------------------------------------------------------------------------------------------------------|-------------------------------------------------------------------------------------------------------------------|------------------------------------------------------------------------------------------------|----------------------------------------------------------------|------------------------------------------------------------------------------------------------------------------------------------------------------------------------------------------|--------------------------------------------------------------------------------------------------------------------|----------------------------------------------------------------------------------|-----------------------------------------------------------------------------------------------------------------------------------------------------------------|------------------------------------------|---|
| <b>Ears</b>                      | Low set ears (HP:0000369)                                                                                                            | +                                                                                                                                      | +                                                                                                                 | +                                                                                              | +                                                              | +                                                                                                                                                                                        | Posteriorly rotated low set ears with hypoplastic helices                                                          | Large, low set posteriorly rotated ears                                          | HP:0008544, under folded helix                                                                                                                                  | HP:0008544, under folded helix           | + |
|                                  | Prominent ear lobules (HP:0009748)                                                                                                   | +                                                                                                                                      | +                                                                                                                 | +                                                                                              | +                                                              | +                                                                                                                                                                                        | +                                                                                                                  | +                                                                                | +                                                                                                                                                               | +                                        | + |
| <b>Ophthalmological features</b> | No gross eye abnormalities, no extraocular muscle weakness, visual acuity not tested but no corrective lenses at time of examination | No gross eye abnormalities, no extraocular muscle weakness, visual acuity not f tested but no corrective lenses at time of examination | Quiet anterior segment, Normal fundus, Visual acuity: left eye (6/12), right eye (6/18), Need glasses (+0.5-1.75) | Quiet anterior segment, Normal fundus, Visual acuity: left eye (6/9), right eye (6/9), Unaided | Bilateral nystagmus, Normal fundus, Need glasses (-1.5, -1.75) | Strabismus, deep set eye, long eye lashes, optic glioma of the eye                                                                                                                       | Refractive error, normal fundus                                                                                    | Strabismus and myopia                                                            | Visual acuity not formally tested but no need for corrective lenses at time of examination; HPO:0007838 progressive Ptosis                                      | Not available                            |   |
| <b>Cardiac abnormalities</b>     | Atrial septal defect                                                                                                                 | Tetralogy of Fallot and pulmonary atresia                                                                                              | None                                                                                                              | Small secundum ASD, two midmuscular VSDs and small PDA (VSDs and PDA closed spontaneously)     | Small patent foramen ovale and VSD                             | ASD, VSD, and PDA (PDA closed spontaneously); dilation of the ascending aorta (Z +3.6), sinus tachycardia, lymphatic vessel neoplasm                                                     | Tetralogy of Fallot with hypoplastic pulmonary annulus, large perimembranous malaligned VSD and large secundum ASD | AVSD, PDA, parachute mitral valve                                                | ASD, VSD, double outlet right ventricle without pulmonary stenosis                                                                                              | ASD, VSD, Double outlet double ventricle |   |
| <b>Skeletal features</b>         | Long fingers and toes                                                                                                                | None                                                                                                                                   | None                                                                                                              | Mild scoliosis                                                                                 | None                                                           | Severe scoliosis, arachnodactyly, large hands, bilateral overlapping of the 3rd toe by the 2nd and 4th toes, asymmetry of the hip, osteochondroma of the proximal left tibial metaphysis | Bilateral overlapping toes, bilateral long great toes                                                              | Open bite and prognathism, long fingers, narrow hands (palm width/length-2.75SD) | Thoracic kyphoscoliosis, long fingers, bilateral cutaneous 2,3 toe syndactyly, overlapping of the 2nd toe by the 3rd toe, narrow hands (palm width/length -3SD) | Not available                            |   |
| <b>Respiratory features</b>      | None                                                                                                                                 | None                                                                                                                                   | Bronchial asthma, recurrent infections                                                                            | Wheezy chest, bronchomalacia                                                                   | Neutropenia, recurrent infections                              | Laryngotracheomalacia, dyspnea, recurrent pneumonia                                                                                                                                      | None                                                                                                               | None                                                                             | None                                                                                                                                                            | None                                     |   |
| <b>Gastrointestinal features</b> | None                                                                                                                                 | None                                                                                                                                   | None                                                                                                              | None                                                                                           | None                                                           | GERD, mesenteric cyst, diarrhea, constipation                                                                                                                                            | None                                                                                                               | Omphalocele and malrotation                                                      | None                                                                                                                                                            | Not available                            |   |
| <b>Genitourinary features</b>    | None                                                                                                                                 | None                                                                                                                                   | None                                                                                                              | None                                                                                           | None                                                           | Mullerian duct remnant, adrenal cyst, dysuria, urinary retention, bilateral inguinal hernia                                                                                              | Penile hypospadias, bilateral undescended testis                                                                   | None                                                                             | None                                                                                                                                                            | Not available                            |   |

(Continued on next page)

**Table 1. Continued**

| Features              | Family 1 | Family 2                                                                                                    | Family 3                                                                                 | Family 4                                                                                                                               | Family 5                                                                                                                               | Family 6                                                                                                                                                                                     |
|-----------------------|----------|-------------------------------------------------------------------------------------------------------------|------------------------------------------------------------------------------------------|----------------------------------------------------------------------------------------------------------------------------------------|----------------------------------------------------------------------------------------------------------------------------------------|----------------------------------------------------------------------------------------------------------------------------------------------------------------------------------------------|
| <b>Other features</b> | None     | Generalized hypotonia (HP:0001290) and hyper active behavior (HP:000752); generalized tonic-clonic seizures | Pectus excavatum (HP:0000767), umbilical hernia, right ectopic kidney with no dilatation | Truncal hypotonia (HP:0008936) and appendicular hypertonia (HP:0002509)                                                                | Macrocephaly, high palate, dolichocephaly, vertigo, generalized hypotonia, pectus excavatum, numerous nevi, boggy subcutaneous lesions | Web neck, low set wide spaced nipples, shallow scrotum                                                                                                                                       |
|                       |          | Widely spaced nipples (HP:0006610)                                                                          |                                                                                          | Macrocephaly, high palate, dolichocephaly, vertigo, generalized hypotonia, pectus excavatum, numerous nevi, boggy subcutaneous lesions | Polylhydramnios, placenta megalay (1100gr), several nevi and cystic scalp formations, Macrocephaly                                     | Polylhydramnios, large placenta (800gr), fatigable weakness of skeletal muscles, partial seizures at onset at 13 years with a sharp wave localized in the left temporal region, Macrocephaly |

Table shows the clinical features of individuals with bi-allelic variants in *TMEM94*. HPO (human phenotype ontology) terms were specified when available. "+"/"-" denotes presence and absence of a clinical feature, respectively. ASD, atrial septal defect; VSD, ventricular septal defect; PDA, patent ductus arteriosus; AVSD, atrioventricular septal defect. \*cDNA nomenclature based on GenBank NM\_001321148.1.

protein showed higher similarity compared to the overall protein sequence.

In the four families (family 1, 2, 4, and 5), exome/genome variant filtering focused on variants located within the homozygous areas of the genome, due to possible consanguinity in the pedigree. A list of homozygous areas and variant filtering strategy are listed in Tables S2–S5. In family 1, exome variant filtering narrowed down the number of variants to four. The *NEMP2* (MIM 616497, NM\_001142645) missense variant is predicted to lead to a leucine to arginine change in a moderately conserved amino acid and a protein domain of unknown function. The *TRIM65* (NM\_173547.3) missense variant (rs61754937) changes an arginine to tryptophan at position 418, a highly conserved amino acid, but has very low constraint metrics (see ExAc). The *SAMD4B* (NM\_018028.3) variant (rs141485885) leads to a valine to isoleucine change in a highly conserved amino acid but not in a known protein domain. By Sanger sequencing, *NEMP2*, *TRIM65*, and *SAMD4B* were homozygous in both affected individuals, hence segregating with the affected status in the family. Of the four variants, however, NM\_001321148.1: c.2764C>T in *TMEM94* gene was extremely rare (rs557746506, ExAc MAF: 1/116268), predicted to truncate the protein, and has the highest CADD score (Phred-score, 43) (Table S5). In family 2, *SERINC2* (MIM614549): NM\_001199037.1: c.1327T>C; p.Tyr443His and *TMEM94*: NM\_001321148.1: c.840del; p.Asp280Glufs\*10 were identified as final candidates (Table S5). The *TMEM94* variants identified in family 1 and 2 (Omani and Qatari) were absent in our in-house whole exome sequencing cohort, which is collected from 2,379 individuals from Saudi Arabia. In Family 4, the final variants included three genes, *TMEM132B*: c.769T>C; p.Trp257Arg, *TMEM94*:c.2000\_2004dup; p.Pro669Alafs\*8, *TRPM5* (MIM 604600): c.1934C>T;p.Thr645Met. In family 5, two final candidate genes were identified: *ITGB4* (MIM 147557): c.737C>T;p.Thr246Met, and *TMEM94*:c.4028+5G>A;p.?. In family 6, two genes in the final list included *TMEM94*: c.3467delA;p.Asn1156Thrfs\*84, and *GAA* (MIM 606800): c.2105G>A; p.Arg702His. In family 5 and 6, the parents and unaffected siblings were carrier for the *TMEM94* variants (Figure S2). The sequencing chromatogram of family 6 is not shown. In family 6, although a suspicious variant in *GAA* was identified (Table S5), the enzymatic studies and clinical picture are inconsistent with Pompe disease (MIM 232300); we nonetheless continue to monitor this proband clinically.

For family 5, affymetrix Cytoscan (2.65 M) Array on the proband revealed 9 regions of homozygosity greater of 3Mb (Table S2). WES in the affected individual (with an average depth of coverage of 234.5x with 98% of the targeted bases with ≥ 20 reads) identified the homozygous substitution c.4028+5G>A (NM\_001321148.1) at the exon / intron boundary 31 of the *TMEM94* gene as best candidate. Sanger sequencing confirmed the variant in homozygous state in both affected siblings and was



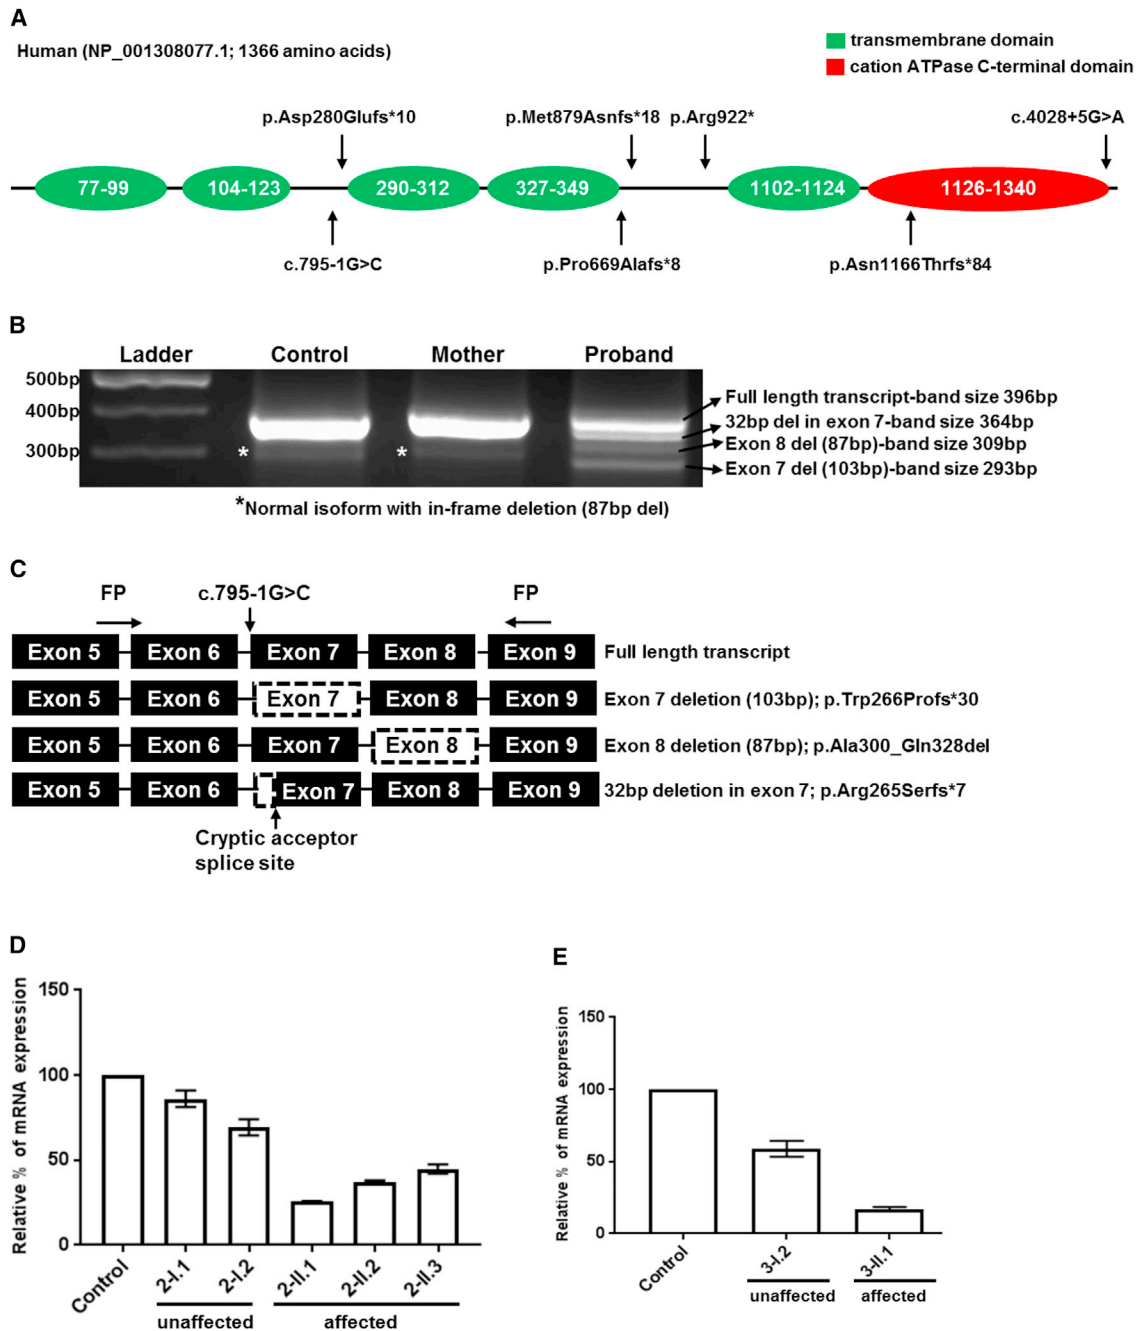

**Figure 2. Molecular Analysis and Gene Expression Studies**

(A) Diagrammatic representation of conserved domains of *TMEM94* and the position of variants in six families identified.

(B) Splice analysis of the variant NM\_001321148.1: c.795-1G>C identified in the proband of family 3. For control and unaffected 20  $\mu$ L of PCR products were loaded into each well, while for the proband 40  $\mu$ L was loaded due to severely reduced abundance of transcripts. Normal full-length transcripts (396 bp) and an isoform with exon 8 deletion (309 bp) that predicted to lead to an in-frame deletion (87 bp) was present in control, unaffected and proband. This isoform could be benign. Proband showed two different mutant transcripts; whole exon 7 skipping (p.Trp266Profs\*30) and 32 bp deletion (p.Arg265Serfs\*7) due to the activation of a cryptic acceptor splice site in exon 7.

(C) Diagram showing the primer designing scheme for splice analysis and aberrant transcripts identified. Black boxes representing the coding region with corresponding exon numbers. Boxes with dashed outlines represents the skipped exons/areas of exons identified through TA sub cloning and sequencing (Chromatograms in Figure S3). Variants are named in reference to NM\_001321148.1 and NP\_001308077.1.

(D and E) Relative quantification of mRNA expression in family 2 and 3 showing markedly reduced expression of *TMEM94* in the affected individuals of family 2 (D: 2-II.1, 2-II.2 and 2-II.3) and family 3 (E: 3-II.1). Error bars represent SEM.

heterozygous in the parents (Figure S2). The base substitution was predicted by in-silico programs to reduce the donor splice site by 66% (MaxEnt: -76%, NNSPLICE: -99.5%, HSF: -13.5%, SpliceSiteFinder-like: -76.8%), resulting in a potential abnormal splicing that possibly affects the C-terminal portion of the protein. Sequencing of RT-PCR products from blood collected in PAXgene RNA tubes confirmed abnormal splicing resulting in 36 bp intronic retention in the transcript introducing a premature termination codon, NM\_001321148.1:r.4028\_4029ins36; p.Val1344\* (Figure S3A).

Of note, none of the homozygous variants of unknown significance in the affected individuals from consanguineous families, including *NEMP2*, *TRIM65*, *SAMD4B*, *SERINC2*, *TRPM5*, *TMEM132B*, and *ITGB4* have been reported to cause recessively inherited neurodevelopmental phenotypes. Genome-wide association studies, however, associate low frequency variants in *TRIM65* with white matter hyperintensities,<sup>36</sup> *de novo* copy number variation of region involving *SERINC2* with autism spectrum disorder,<sup>37</sup> heterozygous variant in *TMEM132B* contributing as a risk factor to intracranial aneurysm.<sup>38</sup>

In family 3, the non-consanguineous family, the final analysis (Tables S4 and S5) revealed compound heterozygous variants in *TMEM94*; a splice site variant, c.795-1G>C, which is predicted to be inherited from the father (father's DNA sample was unavailable for the analysis) and a single base pair duplication, c.2635dup; p.Met879Asnfs\*18 inherited from the mother (Figure S2 and Table S5). RNA-seq analysis of the splice site variant (NM\_001321148.1:c.795-1G>C) *in-silico* predicted an abnormal splicing pattern (Figure S3B). For further confirmation, we PCR amplified the cDNA derived from fibroblasts using primers flanking the proposed splice defect. PCR amplification revealed normal transcript in the affected individual, control, and unaffected mother (Figure 2B), but in addition, we found multiple aberrant transcripts in 3-II.1 (Figure 2B). Sequencing of colonies revealed normal transcripts and a transcript with an in-frame deletion (p.Ala300\_Gln328del), which is present in control, unaffected mother, and proband, suggesting a normal benign isoform. In addition to this, two other mutant transcripts were identified in the affected individual, which is absent in control and mother; skipping of exon 7, and 32 bp deletion in exon 7 due to the activation of a cryptic acceptor site inside exon 7 (Figure 2C). Both aberrant transcripts are predicted to shift the amino acid frame and result to premature termination codons, p.Trp266Profs\*30 and p.Arg265Serfs\*7 (Figures 2B–2C and Figure S3C). Prior to WGS at the UDN, the proband had an extensive work up and normal findings for cytogenetic testing (microarray and karyotype), molecular genetic testing for aortopathy panel (*ACTA2* [MIM 102620], *COL3A1* [MIM120180], *COL5A1* [MIM 120215], *COL5A2* [MIM 120190], *FBN1* [MIM 134797], *FBN2* [MIM612570], *MYH11* [MIM160745], *MYLK* [MIM600922], *SKI* [MIM 164780], *SLC2A10* [MIM 606145], *SMAD3* [MIM 603109],

*TGFB2* [MIM 190220], *TGFBR1* [MIM 190181], *TGFBR2* [MIM 190182]) and clinical exome sequencing.

### Gene Expression Profiling Is Altered in *TMEM94* Mutant Cells

*TMEM94* is predicted to have several isoforms, three of which are predominant coding transcripts (NM\_014738.5, NM\_001321149.1 and NM\_001321148.1). None of the transcripts reported in GenBank<sup>39</sup> lack the last exons of the gene, which encodes the highly conserved C-terminal domain.<sup>40</sup> We checked the level of expression of *TMEM94* transcripts in proband-derived cells available from family 2 and 3. In family 2, RNA expression was reduced by ~60% in three affected individuals (Figure 2D). For family 3, dermal fibroblasts were available for the expression analysis and the affected individual showed 85%–90% reduced expression (Figure 2E). Global transcription profiling by microarray using proband (2-II.3) from family 2 compared to four gender matched controls using 1670 significant probes corresponding to 1257 genes identified 677 upregulated and 580 downregulated (adjusted p value < 0.05 and absolute fold change > 1.5) in the affected individual (Figure S4).

We further examined global gene-expression profile changes using all the three affected individuals from family 2 (II.1, II.2, and II.3) and two unaffected controls by RNA sequencing. Differential expression analysis comparing the affected individuals and controls revealed significant dysregulation of 2438 genes (FDR < 0.05) in the affected individuals (Figures 3A and 3B); 1219 were upregulated and 1219 were downregulated (Table S6). Ingenuity Pathway Analysis of the overall differentially expressed genes revealed the expression of various genes that regulate cellular development, cell to cell interaction, and cell growth and proliferation significantly altered in all the three affected individuals (Figure 3C). Dysregulation of these genes are predicted to have an impact on hematological system development, immune response, organismal injuries and cardiotoxicity. *TMEM94* interaction network generated using dysregulated genes revealed alteration of several essential genes associated with neurological function (Table S7).

### Characterization of *Tmem94* in Mice

Because of the high sequence similarity and homology of human and mouse *TMEM94* (~95%), we knocked out *Tmem94* in mice by using CRISPR-Cas9 technology with two different sets of gRNAs targeting exon 4 (Figure S5A). Consistent with our expectation that this gene is essential for mammalian development, the pups having either compound heterozygous or homozygous variants in *Tmem94*, were either embryonic lethal or born dead. The viable pups from 6 sets of injections were either wild-type or heterozygous. F1 mice with a single null allele (heterozygous; c.361\_364delGC; p.Arg121Profs\*58) appeared morphologically normal; these were outbred with wild-type C57BL/6/J

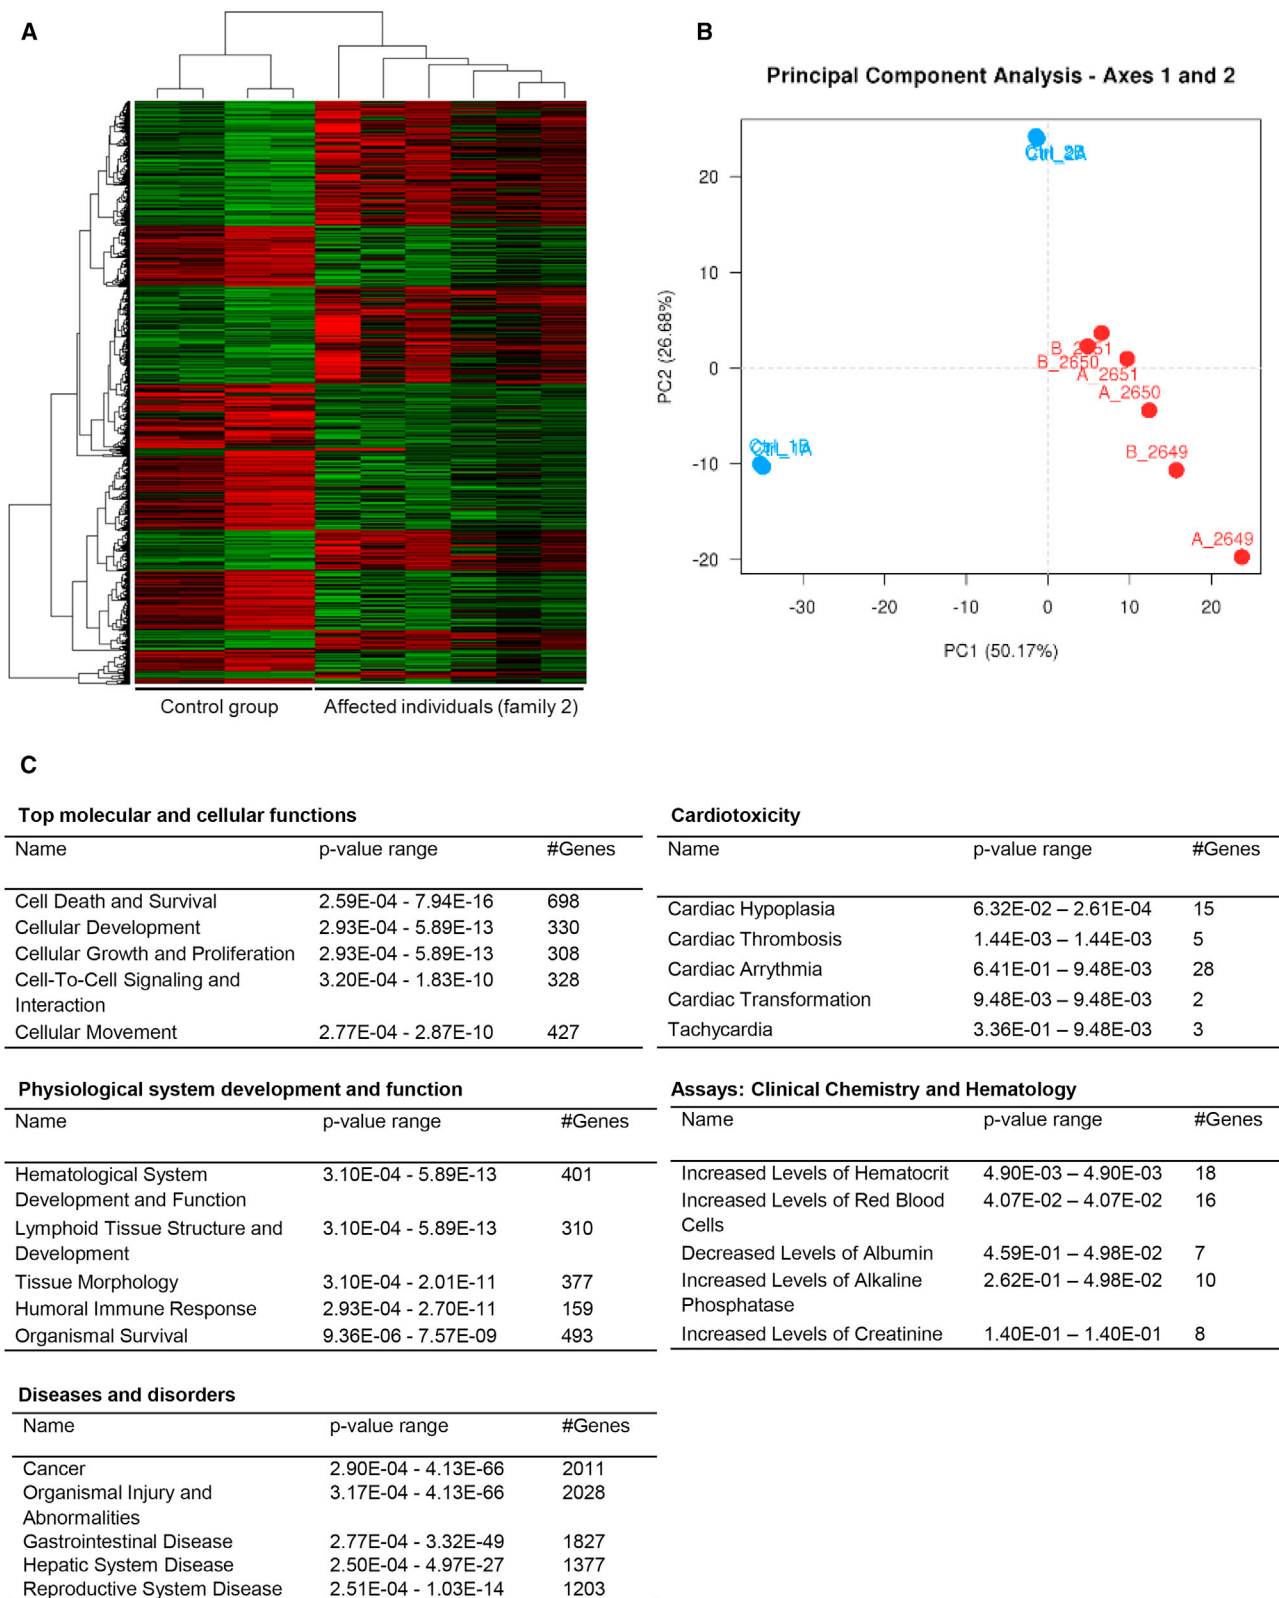

**Figure 3. Transcriptome Profiling and Ingenuity Pathway Analysis in *TMEM94* Mutant Cells**

(A) Heatmap of 2,438 genes that are significantly dysregulated in three (in duplicates) *TMEM94* mutant individuals determined by DESeq2 (FDR < 0.05).

(B) Principal component analysis of normalized gene expression showing significant differences between the control and affected individual group. Red dots indicate individuals with disease phenotype and blue indicates controls.

(C) List of altered molecular and cellular functions, physiological functions and diseases associated with the dysregulated genes. p values and the number of dysregulated genes involved for each function are also shown.



to identify F2s, then in-crossed to identify germline mutants. About 20% homozygous mutants were identified at E18.5 and all mutants were dead by P1, suggesting an embryonic lethal phenotype. Homozygous mutants evaluated at E12.5 stage showed variable amount of hemorrhages in the frontal and hind regions of the cephalic area (Figures 4A, 1–2). Similarly, at E15.5 days, mutants showed hemorrhage and decreased body size (Figure 4A, 3–4). E18.5 days old mutants were developmentally delayed and showed dysmorphic facies, round head, decreased body size, hemorrhage and disrupted craniofacial bone on CT and X-ray (Figures 4A-B and S5B). Whole body MRI imaging at E18.5 revealed that the mutant mice showed poorly developed heart chambers (Figure 4C, 1–3). *Tmem94* expression analysis of the mutants showed 80%–90% reduction of mRNA transcripts in the embryonic fibroblasts (Figure S5C).

### Histopathological Analysis of *Tmem94*<sup>-/-</sup> Mice

We analyzed the histology of heart and brain of mutant embryos to further understand the mutant phenotype. Tiled images of the heart sections showed that mutant mice at E18.5 presented with a small rounded heart, poorly organized auricles, irregular inner ventricular surface, and disarray of heart muscle fibers at the interventricular septum (Figure 4D), consistent with the MRI findings (Figure 4C). We examined the neuronal layering pattern of the cortical region at two different stages of gestation. The marginal zone, cortical plate, intermediate zone, and ventricular zone were clearly recognizable in wild-type embryos. In contrast, E15.5 mutants showed comparatively thin and significantly disorganized cortical layers (Figure 4E). The surviving embryos at E18.5 showed fewer neurons in the cortical plate and absence of distinct subplate layer indicating defects in neuronal migration (Figure 4E). These results conclude that *Tmem94* has a profound role in mouse embryonic development, especially neural and cardiovascular systems.

### Discussion

Here we present a rare form of NDD associated with facial dysmorphism and presence of CHD in ten similarly affected individuals from six unrelated families of different ethnic background. The common clinical features include: characteristic facial features (triangular face, widely spaced eyes, thick arched eyebrows, depressed nasal bridge and broad nasal root and tip, pointed chin and posteriorly rotated low set ears) and global developmental delay. Most of them had generalized hypertrichosis; congenital overgrowth (increased birth weight, postnatal height, weight and head circumference in the upper normal range); and cardiac abnormalities (atrial septal defect, Tetralogy of Fallot, patent ductus arteriosus, and ventricular septal defect). We link this disorder to likely loss-of-function bi-allelic variants in *TMEM94*. Nonetheless, there are

clinical features that are different among our affected individuals. Brain MRI changes seemed to be variable and one proband (2-II.1) did not manifest with a structural cardiac defect. Other variable clinical features we observed are: ophthalmological features including nystagmus (1/10), myopia (1/10) and strabismus (2/10); skeletal features of scoliosis (3/10), arachnodactyly (4/10) and overlapping toes (3/10); macrocephaly (3/10), pectus excavatum (2/10), widely spaced nipples (2/10), respiratory infections (4/10), gastrointestinal abnormalities (2/10), and seizures (2/10). These clinical features can be due to the variability in genetic background among the affected individuals. The identification of additional cases will likely help clarify the spectrum of *TMEM94*-associated disorder.

*TMEM94*, originally named *KIAA0195*<sup>41</sup> is located on chromosome 17q25.1, and encodes a putatively nuclear protein with predicted multi pass membrane domains and several serine residues for phosphorylation or glycosylation.<sup>42–47</sup> The C-terminal region of *TMEM94* is evolutionary conserved in multiple mammalian species and is predicted to be perturbed in all the affected individuals due to truncating variants. None of the reported transcripts of *TMEM94* lacks the C-terminal region of the protein, specifically residues that are part of the cation transporting P-type ATPase domain (NP\_055553.3; residues 1116–1330),<sup>48</sup> suggesting that this might be an important protein domain. To understand the possible role *TMEM94*, we studied global gene-expression pattern in the mutant cells of family 2. The altered gene list implies the role of this gene in cell-cycle progression, nervous system, and hematological system development. *TMEM94* has been shown to be induced under hypoxic conditions in breast cancer cell lines.<sup>49</sup> The transcription network is upregulated during hypoxia to promote expression of the genes involved in cell survival and to regulate high energy demanding processes such as translation, cell division, and proliferation,<sup>50</sup> suggesting the involvement of *TMEM94* in cell division. Further analysis of the cell-cycle pattern of dermal fibroblasts from the affected individual using propidium iodide staining (Supplemental Experimental Procedures) showed that at baseline, the cells from the affected and controls appeared to be predominantly in the G0/G1 phase (Figure S6). Synchronization of cell cycle with starvation did not show any marked differences between affected and controls, while nocodazole treatment increased the number of cells in G2/M phase in control cells while affected cells showed a decrease in the G2/M phase cells, suggesting defects in cell-cycle progression (Figure S6). Although, our global gene expression analysis and cell-cycle assays imply to the role of *TMEM94* in cell division, further studies will be needed to confirm this hypothesis and characterize the role of this protein in the cell.

*TMEM94* is known for the possible interaction with cyclin dependent kinase 5 (CDK5; MIM 123831) and acidic fibroblast growth factor intracellular-binding protein (FIBP; MIM 608296) in human embryonic kidney cells.<sup>51–53</sup> Our expression profiling studies did not reveal

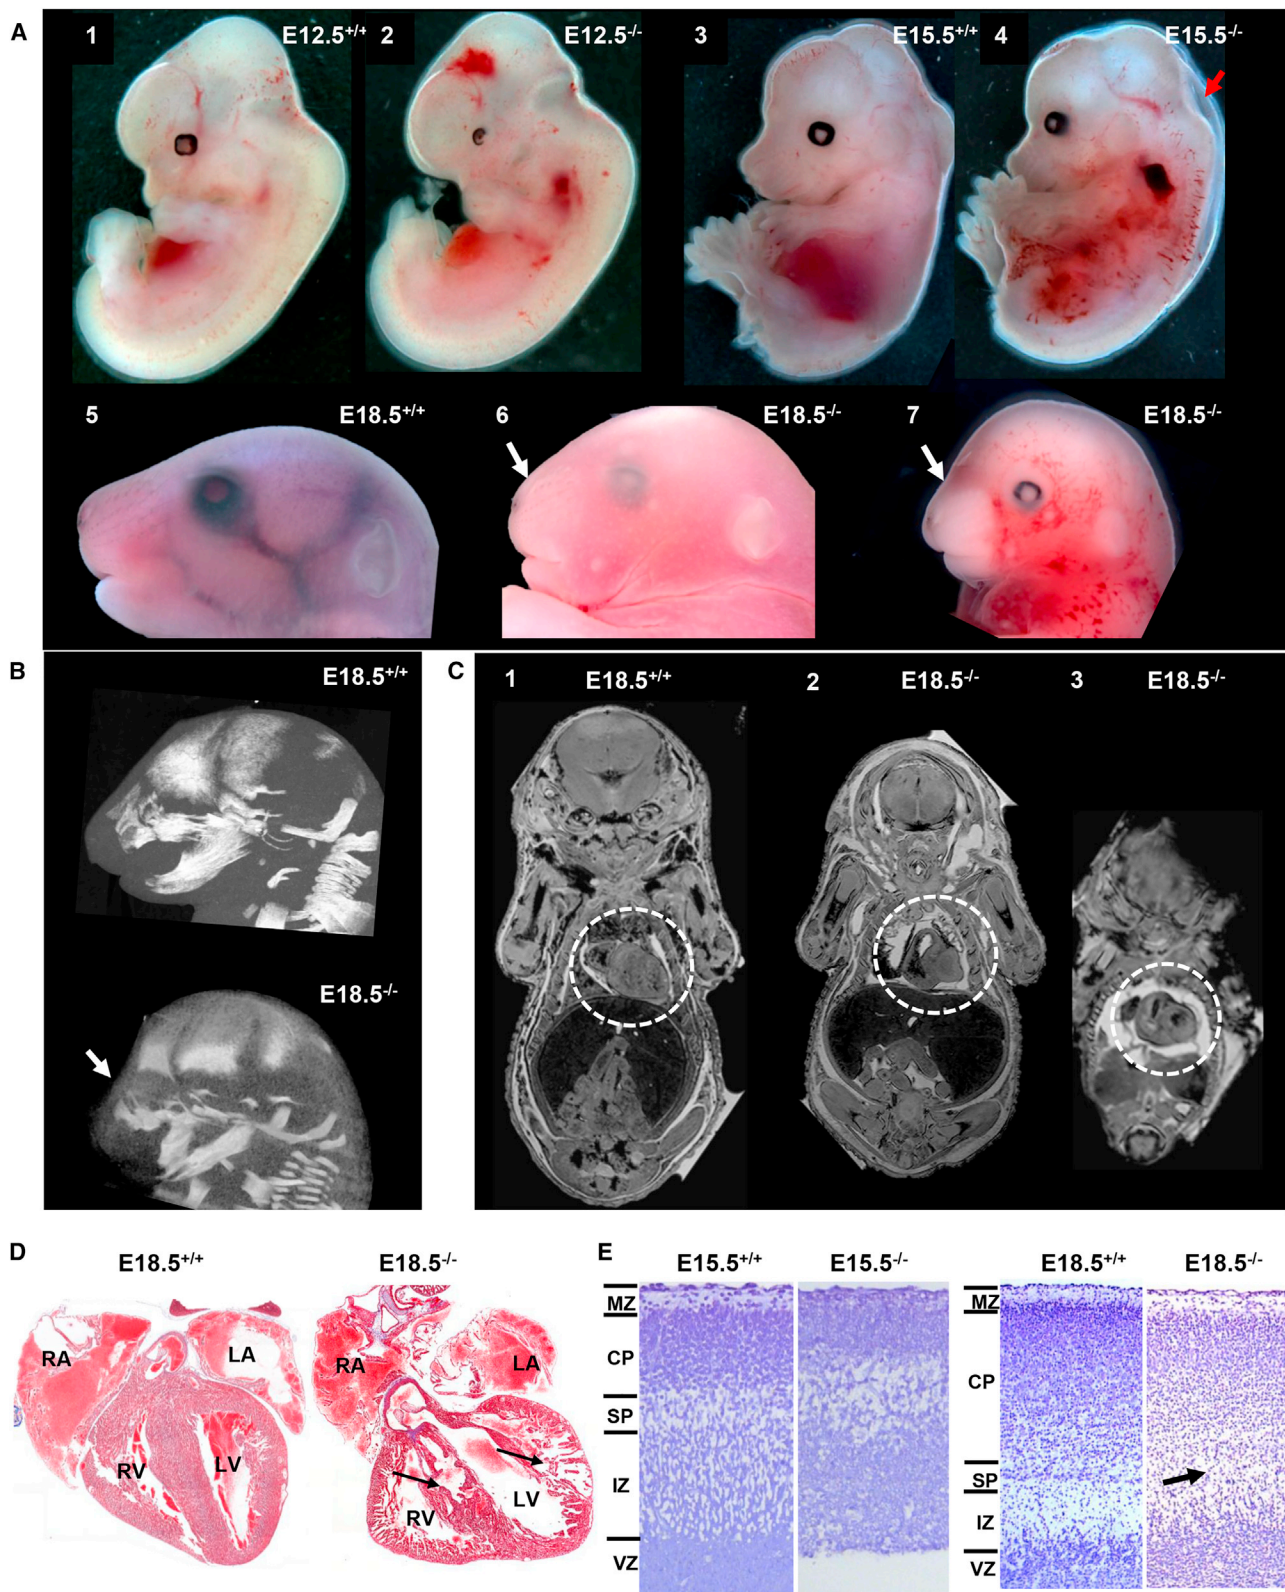

**Figure 4. Phenotypic and Histopathological Evaluation of *Tmem94* Knockout Mice**

(A) *Tmem94*<sup>-/-</sup> mice were embryonic lethal, hemorrhagic, and showed craniofacial abnormalities. *Tmem94* knock-out phenotype at different embryonic development stages showed varying degree of severity. Compared to the wild-type (1), homozygous mutant (2) at early embryonic stage (E12.5 days) showed hemorrhage at frontal and hind regions of brain. At E15.5 days, compared to wild-type (3), mutants (4) showed decreased body size, hemorrhage and fluid filled embryo sac (arrow) suggesting fetal resorption. The mutants at E18.5 showed craniofacial abnormalities (6 and 7), round head shape, and superficial hemorrhages, compared to the wild-type (5).

(legend continued on next page)

any significant dysregulation of CDK5 and FIBP. CDK5 and FIBP have a proven essential role in cell division.<sup>54,55</sup> Bi-allelic loss-of-function variants in *CDK5* and *FIBP* in human and mice has been shown to cause neurological manifestations; *CDK5* variants in humans cause lissencephaly with cerebellar hypoplasia (MIM 616342),<sup>56</sup> *Cdk5*<sup>-/-</sup> mice manifested neurodegeneration and neuronal migration defects,<sup>57</sup> *FIBP* variants cause Thauvin-Robinet-Faivre syndrome (MIM 617107) with clinical highlights including facial dysmorphism, CHD, macrocephaly, learning disabilities and overgrowth.<sup>58</sup> Interestingly, the two probands from family 2 and the probands from families 3, 4, and 5 manifested isolated overgrowth and macrocephaly, like what was reported in individuals with *FIBP* variants. These phenotypic similarities suggest some degree of possible functional overlap of *TMEM94* with *CDK5* and *FIBP*; further studies will be required to show the functional interaction of these three proteins within the cell.

Loss of *Tmem94* in mice leads to an embryonic lethal phenotype and abnormalities in multiple tissues, including nervous and cardiovascular systems, suggesting the role of this gene in early development. In murine cerebral cortex, histogenesis and migration occurs during embryonic days E11.5 to E17.5 of gestation.<sup>59</sup> *Tmem94* mutants at E15.5 and E18.5 days showed abnormalities in the layering pattern of developing cortex suggesting delayed neurodevelopment.

The presence of loss-of-function *TMEM94* variants in six unrelated families with NDD, distinct and recognizable facial dysmorphism, and variable penetrance for cardiac abnormalities highlight the importance of *TMEM94* in neural and cardiovascular development. In the context of the loss-of-function variant in the affected individuals in our study and *Tmem94* knockout in mice, we demonstrate a role for this gene in mammalian embryonic development. In conclusion, we report a syndrome characterized by NDD and distinct facial dysmorphism due to truncating variants in *TMEM94*, a gene so far not associated with a specific cellular function or human disease.

### Accession Numbers

The variants reported in this manuscript have been deposited in Leiden Open Variation Database (LOVD) and is publicly available through: <https://databases.lovd.nl/shared/transcripts/00010486>.

### Supplemental Data

Supplemental Data include six figures, seven tables, and Supplemental Experimental Procedures and can be found with this article online at <https://doi.org/10.1016/j.ajhg.2018.11.001>.

### Acknowledgments

We thank the individuals in our study and their families for participating in this study. This work was supported by the Intramural Research Program of the National Human Genome Research Institute, National Institutes of Health, USA, NIH Common Fund from the Office of the Director, U01 HG007703 (SF Nelson, JA Martinez-Agosto) and the King Salman Center for Disability Research grant (FSA). We acknowledge the support of the “Saudi Human Genome Program.” The authors also would like to thank the coordinators and Olfat Al-Harazi (King Faisal Specialist Hospital and Research Center, Riyadh, Saudi Arabia), Valerie Maduro (NIH-UDP, NHGRI, National Institutes of Health), Ten Taro (NIH-UDP, NHGRI, National Institutes of Health), and Dr. Jan Linkenhoker (NHGRI, National Institutes of Health). We also thank Dr. Michael J. Kruhlak (NCI Experimental Immunology Branch, Microscopy Digital Imaging facility), and NIDCR Combined Technical Research Core for helping with the imaging of histology slides. The authors do not have any conflict of interest to declare. Anita Rauch was supported by radiz—Rare Disease Initiative Zürich, Clinical Research Priority Program for Rare Diseases of the University of Zurich.

### Declaration of Interests

The authors declare no competing interests.

Received: June 27, 2018

Accepted: November 2, 2018

Published: December 6, 2018

### Web Resources

Alamut, <http://www.interactive-biosoftware.com/>

BWA, <https://github.com/lh3/bwa/releases>

CADD, <https://cadd.gs.washington.edu/>

Cufflinks, <http://cole-trapnell-lab.github.io/cufflinks/>

dbSNP, <https://www.ncbi.nlm.nih.gov/projects/SNP/>

ExAC Browser, <http://exac.broadinstitute.org/> (last accessed January 2018)

The Human Protein Atlas, <http://www.proteinatlas.org/>

GenBank, <https://www.ncbi.nlm.nih.gov/genbank/>

GeneDx, <https://www.genedx.com>

gnomAD Browser, <http://gnomad.broadinstitute.org/> (last accessed January 2018)

(B) CT images of mutant (lower panel) showing short nasal bone (arrow) and craniofacial abnormalities compared to the wild-type (upper panel).

(C) Coronal MRI scan of embryos at E18.5 days showing poorly developed heart structure in two mutants (2 and 3) compared to wild-type (1). The region of heart is highlighted in white dotted circle.

(D) In comparison to wild-type (left panel), Masson trichrome staining of coronal heart sections of mutants (right panel) at E18.5 presented small rounded heart, poorly organized auricles (RA: right auricle, LA: Left auricle), irregular inner ventricular surface (RV: right ventricle, LV: Left ventricle), disarray of heart muscle fibers at the heart wall and interventricular septum (arrows, right panel).

(E) Nissl stained sagittal sections of mouse neocortex at E15.5 and E18.5 days. Wild-type embryos show clearly recognizable marginal zone (MZ), cortical plate (CP), sub plate (SP), intermediate zone (IZ), and ventricular zone (VZ). E15.5<sup>-/-</sup> embryo has comparatively thin disorganized neocortex and lacks distinct cortical layers (left panel). E18.5<sup>-/-</sup> manifests delayed migrating neurons, dispersed CP layer and absence of distinct sub plate layer (right panel, arrow).



IGV, <http://www.broadinstitute.org/igv/>  
 MGI, <http://www.informatics.jax.org/allele/4432189>  
 MutationTaster, <http://www.mutationtaster.org/>  
 OMIM, <http://www.omim.org/>  
 neXtprot, <https://www.nextprot.org/term/FA-00613/>  
 PolyPhen-2, <http://genetics.bwh.harvard.edu/pph2/>  
 RNA-SeQC, <https://software.broadinstitute.org/cancer/cga/rna-seq>  
 SIFT, <http://sift.bii.a-star.edu.sg/>  
 STRING 9.0, <http://www.string-db.org/>  
 UniProt, <http://www.uniprot.org/>  
 UCSC Genome Browser, <https://genome.ucsc.edu>

## References

- Stiles, J., and Jernigan, T.L. (2010). The basics of brain development. *Neuropsychol. Rev.* *20*, 327–348.
- Homberg, J.R., Kyzar, E.J., Nguyen, M., Norton, W.H., Pittman, J., Poudel, M.K., Gaikwad, S., Nakamura, S., Koshiba, M., Yamanouchi, H., et al. (2016). Understanding autism and other neurodevelopmental disorders through experimental translational neurobehavioral models. *Neurosci. Biobehav. Rev.* *65*, 292–312.
- Bostwick, B.L., McLean, S., Posey, J.E., Streff, H.E., Gripp, K.W., Blesson, A., Powell-Hamilton, N., Tusi, J., Stevenson, D.A., Farrelly, E., et al.; Members of the Undiagnosed Diseases Network (2017). Phenotypic and molecular characterisation of CDK13-related congenital heart defects, dysmorphic facial features and intellectual developmental disorders. *Genome Med.* *9*, 73.
- Kaufman, L., Ayub, M., and Vincent, J.B. (2010). The genetic basis of non-syndromic intellectual disability: a review. *J. Neurodev. Disord.* *2*, 182–209.
- Quaegebeur, A., Lange, C., and Carmeliet, P. (2011). The neurovascular link in health and disease: molecular mechanisms and therapeutic implications. *Neuron* *71*, 406–424.
- Simões-Costa, M., Tan-Cabugao, J., Antoshechkin, I., Sauka-Spengler, T., and Bronner, M.E. (2014). Transcriptome analysis reveals novel players in the cranial neural crest gene regulatory network. *Genome Res.* *24*, 281–290.
- Simões-Costa, M., and Bronner, M.E. (2013). Insights into neural crest development and evolution from genomic analysis. *Genome Res.* *23*, 1069–1080.
- Anazi, S., Maddirevula, S., Faqih, E., Alsedairy, H., Alzahrani, F., Shamseldin, H.E., Patel, N., Hashem, M., Ibrahim, N., Abdulwahab, F., et al. (2017). Clinical genomics expands the morbid genome of intellectual disability and offers a high diagnostic yield. *Mol. Psychiatry* *22*, 615–624.
- Harripaul, R., Vasli, N., Mikhailov, A., Rafiq, M.A., Mittal, K., Windpassinger, C., Sheikh, T.I., Noor, A., Mahmood, H., Downey, S., et al. (2018). Mapping autosomal recessive intellectual disability: combined microarray and exome sequencing identifies 26 novel candidate genes in 192 consanguineous families. *Mol. Psychiatry* *23*, 973–984.
- Homsy, J., Zaidi, S., Shen, Y., Ware, J.S., Samocha, K.E., Karczewski, K.J., DePalma, S.R., McKean, D., Wakimoto, H., Gorham, J., et al. (2015). De novo mutations in congenital heart disease with neurodevelopmental and other congenital anomalies. *Science* *350*, 1262–1266.
- Kochinke, K., Zweier, C., Nijhof, B., Fenckova, M., Cizek, P., Honti, F., Keerthikumar, S., Oortveld, M.A., Kleefstra, T., Kramer, J.M., et al. (2016). Systematic Phenomics Analysis Deconvolutes Genes Mutated in Intellectual Disability into Biologically Coherent Modules. *Am. J. Hum. Genet.* *98*, 149–164.
- Riazaiddin, S., Hussain, M., Razzaq, A., Iqbal, Z., Shahzad, M., Polla, D.L., Song, Y., van Beusekom, E., Khan, A.A., Tomas-Roca, L., et al.; UK10K (2017). Exome sequencing of Pakistani consanguineous families identifies 30 novel candidate genes for recessive intellectual disability. *Mol. Psychiatry* *22*, 1604–1614.
- Mefford, H.C., Batshaw, M.L., and Hoffman, E.P. (2012). Genomics, intellectual disability, and autism. *N. Engl. J. Med.* *366*, 733–743.
- Gilissen, C., Hehir-Kwa, J.Y., Thung, D.T., van de Vorst, M., van Bon, B.W., Willemsen, M.H., Kwint, M., Janssen, I.M., Hoischen, A., Schenck, A., et al. (2014). Genome sequencing identifies major causes of severe intellectual disability. *Nature* *511*, 344–347.
- Vissers, L.E., Gilissen, C., and Veltman, J.A. (2016). Genetic studies in intellectual disability and related disorders. *Nat. Rev. Genet.* *17*, 9–18.
- Sobreira, N., Schiettecatte, F., Valle, D., and Hamosh, A. (2015). GeneMatcher: a matching tool for connecting investigators with an interest in the same gene. *Hum. Mutat.* *36*, 928–930.
- Gahl, W.A., Mulvihill, J.J., Toro, C., Markello, T.C., Wise, A.L., Ramoni, R.B., Adams, D.R., Tift, C.J.; and UDN (2016). The NIH Undiagnosed Diseases Program and Network: Applications to modern medicine. *Mol. Genet. Metab.* *117*, 393–400.
- Gahl, W.A., Wise, A.L., and Ashley, E.A. (2015). The Undiagnosed Diseases Network of the National Institutes of Health: A National Extension. *JAMA* *314*, 1797–1798.
- Garland, J., Stephen, J., Class, B., Gruber, A., Ciccone, C., Poliak, A., Hayes, C.P., Singhal, V., Slota, C., Perreault, J., et al. (2017). Identification of an *Alu* element-mediated deletion in the promoter region of *GNE* in siblings with GNE myopathy. *Mol. Genet. Genomic Med.* *5*, 410–417.
- Stephen, J., Vilboux, T., Haberman, Y., Pri-Chen, H., Podeshakke, B., Mazaheri, S., Marek-Yagel, D., Barel, O., Di Segni, A., Eyal, E., et al. (2016). Congenital protein losing enteropathy: an inborn error of lipid metabolism due to DGAT1 mutations. *Eur. J. Hum. Genet.* *24*, 1268–1273.
- Shaheen, R., Anazi, S., Ben-Omran, T., Seidahmed, M.Z., Caddle, L.B., Palmer, K., Ali, R., Alshidi, T., Hagos, S., Goodwin, L., et al. (2016). Mutations in SMG9, Encoding an Essential Component of Nonsense-Mediated Decay Machinery, Cause a Multiple Congenital Anomaly Syndrome in Humans and Mice. *Am. J. Hum. Genet.* *98*, 643–652.
- Dobin, A., Davis, C.A., Schlesinger, F., Drenkow, J., Zaleski, C., Jha, S., Batut, P., Chaisson, M., and Gingeras, T.R. (2013). STAR: ultrafast universal RNA-seq aligner. *Bioinformatics* *29*, 15–21.
- Bolger, A.M., Lohse, M., and Usadel, B. (2014). Trimmomatic: a flexible trimmer for Illumina sequence data. *Bioinformatics* *30*, 2114–2120.
- Harrow, J., Frankish, A., Gonzalez, J.M., Tapanari, E., Diekhans, M., Kokocinski, F., Aken, B.L., Barrell, D., Zadissa, A., Searle, S., et al. (2012). GENCODE: the reference human genome annotation for The ENCODE Project. *Genome Res.* *22*, 1760–1774.
- Liao, Y., Smyth, G.K., and Shi, W. (2014). featureCounts: an efficient general purpose program for assigning sequence reads to genomic features. *Bioinformatics* *30*, 923–930.
- O’Leary, N.A., Wright, M.W., Brister, J.R., Ciuffo, S., Haddad, D., McVeigh, R., Rajput, B., Robbertse, B., Smith-White, B., Ako-Adjei, D., et al. (2016). Reference sequence (RefSeq)

- database at NCBI: current status, taxonomic expansion, and functional annotation. *Nucleic Acids Res.* *44* (D1), D733–D745.
27. Pruitt, K.D., Tatusova, T., and Maglott, D.R. (2007). NCBI reference sequences (RefSeq): a curated non-redundant sequence database of genomes, transcripts and proteins. *Nucleic Acids Res.* *35*, D61–D65.
  28. Love, M.I., Huber, W., and Anders, S. (2014). Moderated estimation of fold change and dispersion for RNA-seq data with DESeq2. *Genome Biol.* *15*, 550.
  29. Varet, H., Brillet-Guéguen, L., Coppée, J.Y., and Dillies, M.A. (2016). SARTools: A DESeq2- and EdgeR-Based R Pipeline for Comprehensive Differential Analysis of RNA-Seq Data. *PLoS ONE* *11*, e0157022.
  30. Krämer, A., Green, J., Pollard, J., Jr., and Tugendreich, S. (2014). Causal analysis approaches in Ingenuity Pathway Analysis. *Bioinformatics* *30*, 523–530.
  31. Benjamini, Y., and Hochberg, Y. (1995). Controlling the False Discovery Rate: A Practical and Powerful Approach to Multiple Testing. *J. R. Stat. Soc. B* *57*, 289–300.
  32. Moreno-Mateos, M.A., Vejnar, C.E., Beaudoin, J.D., Fernandez, J.P., Mis, E.K., Khokha, M.K., and Giraldez, A.J. (2015). CRISPRscan: designing highly efficient sgRNAs for CRISPR-Cas9 targeting in vivo. *Nat. Methods* *12*, 982–988.
  33. Harms, D.W., Quadros, R.M., Seruggia, D., Ohtsuka, M., Takahashi, G., Montoliu, L., and Gurumurthy, C.B. (2014). Mouse Genome Editing Using the CRISPR/Cas System. *Current protocols in human genetics* *83*, 15.17.11-27.
  34. Haase, A., Frahm, J., Matthaei, D., Hanicke, W., and Merboldt, K.D. (1986). Flash Imaging - Rapid Nmr Imaging Using Low Flip-Angle Pulses. *J. Magn. Reson.* *67*, 258–266.
  35. Yildirim, Y., Sahbaz, I., Kar, T., Kagan, G., Taner, M.T., Arman, I., and Cakici, B. (2015). Evaluation of interpupillary distance in the Turkish population. *Clin. Ophthalmol.* *9*, 1413–1416.
  36. Fornage, M., Durette, S., Bis, J.C., Schmidt, H., Ikram, M.A., Dufouil, C., Sigurdsson, S., Lumley, T., DeStefano, A.L., Fazzekas, F., et al. (2011). Genome-wide association studies of cerebral white matter lesion burden: the CHARGE consortium. *Ann. Neurol.* *69*, 928–939.
  37. Hnoonual, A., Thammachote, W., Tim-Aroon, T., Rojnueangnit, K., Hansakunachai, T., Sombuntham, T., Roongpraiwan, R., Worachotekamjorn, J., Chuthapisith, J., Fucharoen, S., et al. (2017). Chromosomal microarray analysis in a cohort of underrepresented population identifies SERINC2 as a novel candidate gene for autism spectrum disorder. *Scientific reports* *21*; *7* (1):12096.
  38. Farlow, J.L., Lin, H., Sauerbeck, L., Lai, D., Koller, D.L., Pugh, E., Hetrick, K., Ling, H., Kleinloog, R., van der Vlies, P., et al. (2015). Lessons learned from whole exome sequencing in multiplex families affected by a complex genetic disorder, intracranial aneurysm. *PLoS One* *24*, e0121104, *10* (3).
  39. Ota, T., Suzuki, Y., Nishikawa, T., Otsuki, T., Sugiyama, T., Irie, R., Wakamatsu, A., Hayashi, K., Sato, H., Nagai, K., et al. (2004). Complete sequencing and characterization of 21,243 full-length human cDNAs. *Nat. Genet.* *36*, 40–45.
  40. Marchler-Bauer, A., Bo, Y., Han, L., He, J., Lanczycki, C.J., Lu, S., Chitsaz, F., Derbyshire, M.K., Geer, R.C., Gonzales, N.R., et al. (2017). CDD/SPARCLE: functional classification of proteins via subfamily domain architectures. *Nucleic Acids Res.* *45* (D1), D200–D203.
  41. Nagase, T., Seki, N., Ishikawa, K., Tanaka, A., and Nomura, N. (1996). Prediction of the coding sequences of unidentified human genes. V. The coding sequences of 40 new genes (KIAA0161-KIAA0200) deduced by analysis of cDNA clones from human cell line KG-1. *DNA research: an international journal for rapid publication of reports on genes and genomes* *3*, 17–24.
  42. Tan, H., Wu, Z., Wang, H., Bai, B., Li, Y., Wang, X., Zhai, B., Beach, T.G., and Peng, J. (2015). Refined phosphopeptide enrichment by phosphate additive and the analysis of human brain phosphoproteome. *Proteomics* *15*, 500–507.
  43. Zhou, H., Di Palma, S., Preisinger, C., Peng, M., Polat, A.N., Heck, A.J., and Mohammed, S. (2013). Toward a comprehensive characterization of a human cancer cell phosphoproteome. *J. Proteome Res.* *12*, 260–271.
  44. Rigbolt, K.T., Prokhorova, T.A., Akimov, V., Henningsen, J., Johansen, P.T., Kratchmarova, I., Kassem, M., Mann, M., Olsen, J.V., and Blagoev, B. (2011). System-wide temporal characterization of the proteome and phosphoproteome of human embryonic stem cell differentiation. *Sci. Signal.* *4*, rs3.
  45. Oppermann, F.S., Gnad, F., Olsen, J.V., Hornberger, R., Greff, Z., Kéri, G., Mann, M., and Daub, H. (2009). Large-scale proteomics analysis of the human kinome. *Mol. Cell. Proteomics* *8*, 1751–1764.
  46. Daub, H., Olsen, J.V., Bairlein, M., Gnad, F., Oppermann, F.S., Körner, R., Greff, Z., Kéri, G., Stemmann, O., and Mann, M. (2008). Kinase-selective enrichment enables quantitative phosphoproteomics of the kinome across the cell cycle. *Mol. Cell* *31*, 438–448.
  47. Bian, Y., Song, C., Cheng, K., Dong, M., Wang, F., Huang, J., Sun, D., Wang, L., Ye, M., and Zou, H. (2014). An enzyme assisted RP-RPLC approach for in-depth analysis of human liver phosphoproteome. *J. Proteomics* *96*, 253–262.
  48. Marchler-Bauer, A., Derbyshire, M.K., Gonzales, N.R., Lu, S., Chitsaz, F., Geer, L.Y., Geer, R.C., He, J., Gwadz, M., Hurwitz, D.I., et al. (2015). CDD: NCBI's conserved domain database. *Nucleic Acids Res.* *43*, D222–D226.
  49. Abu-Jamous, B., Buffa, F.M., Harris, A.L., and Nandi, A.K. (2017). In vitro downregulated hypoxia transcriptome is associated with poor prognosis in breast cancer. *Mol. Cancer* *16*, 105.
  50. Ortmann, B., Druker, J., and Rocha, S. (2014). Cell cycle progression in response to oxygen levels. *Cell. Mol. Life Sci.* *71*, 3569–3582.
  51. Varjosalo, M., Keskitalo, S., Van Drogen, A., Nurkkala, H., Vichalkovski, A., Aebersold, R., and Gstaiger, M. (2013). The protein interaction landscape of the human CMGC kinase group. *Cell Rep.* *3*, 1306–1320.
  52. Varjosalo, M., Sacco, R., Stukalov, A., van Drogen, A., Planyavsky, M., Hauri, S., Aebersold, R., Bennett, K.L., Colinge, J., Gstaiger, M., and Superti-Furga, G. (2013). Interlaboratory reproducibility of large-scale human protein-complex analysis by standardized AP-MS. *Nat. Methods* *10*, 307–314.
  53. Xu, S., Li, X., Gong, Z., Wang, W., Li, Y., Nair, B.C., Piao, H., Yang, K., Wu, G., and Chen, J. (2014). Proteomic analysis of the human cyclin-dependent kinase family reveals a novel CDK5 complex involved in cell growth and migration. *Mol. Cell. Proteomics* *13*, 2986–3000.
  54. Kolpakova, E., Wiediocha, A., Stenmark, H., Klingenberg, O., Falnes, P.O., and Olsnes, S. (1998). Cloning of an intracellular protein that binds selectively to mitogenic acidic fibroblast growth factor. *Biochem. J.* *336*, 213–222.

55. Kawauchi, T. (2014). Cdk5 regulates multiple cellular events in neural development, function and disease. *Dev. Growth Differ.* 56, 335–348.
56. Magen, D., Ofir, A., Berger, L., Goldsher, D., Eran, A., Katib, N., Nijem, Y., Vlodaysky, E., Tzur, S., Behar, D.M., et al. (2015). Autosomal recessive lissencephaly with cerebellar hypoplasia is associated with a loss-of-function mutation in CDK5. *Hum. Genet.* 134, 305–314.
57. Takahashi, S., Ohshima, T., Hirasawa, M., Pareek, T.K., Bugge, T.H., Morozov, A., Fujieda, K., Brady, R.O., and Kulkarni, A.B. (2010). Conditional deletion of neuronal cyclin-dependent kinase 5 in developing forebrain results in microglial activation and neurodegeneration. *Am. J. Pathol.* 176, 320–329.
58. Thauvin-Robinet, C., Duplomb-Jego, L., Limoge, F., Picot, D., Masurel, A., Terriat, B., Champilou, C., Minot, D., St-Onge, J., Kuentz, P., et al. (2016). Homozygous FIBP nonsense variant responsible of syndromic overgrowth, with overgrowth, macrocephaly, retinal coloboma and learning disabilities. *Clin. Genet.* 89, e1–e4.
59. Kwan, K.Y., Sestan, N., and Anton, E.S. (2012). Transcriptional co-regulation of neuronal migration and laminar identity in the neocortex. *Development* 139, 1535–1546.



## Supplemental Data

### **Bi-allelic *TMEM94* Truncating Variants Are Associated with Neurodevelopmental Delay, Congenital Heart Defects, and Distinct Facial Dysmorphism**

**Joshi Stephen, Sateesh Maddirevula, Sheela Nampoothiri, John D. Burke, Matthew Herzog, Anju Shukla, Katharina Steindl, Ascia Eskin, Siddaramappa J. Patil, Pascal Joset, Hane Lee, Lisa. J. Garrett, Tadafumi Yokoyama, Nicholas Balanda, Steven P. Bodine, Nathaniel J. Tolman, Patricia M. Zerfas, Allison Zheng, Georgia Ramantani, Katta M. Girisha, Cecilia Rivas, Pujar V. Suresh, Abdel Elkahloun, Hessa S. Alsaif, Salma M. Wakil, Laila Mahmoud, Rehab Ali, Michaela Prochazkova, Undiagnosed Diseases Network members, Ashok B. Kulkarni, Tawfeg Ben-Omran, Dilek Colak, H. Douglas Morris, Anita Rauch, Julian A. Martinez-Agosto, Stanley F. Nelson, Fowzan S. Alkuraya, William A. Gahl, and May Christine V. Malicdan**

## Supplemental Data

### Supplemental figures and legends

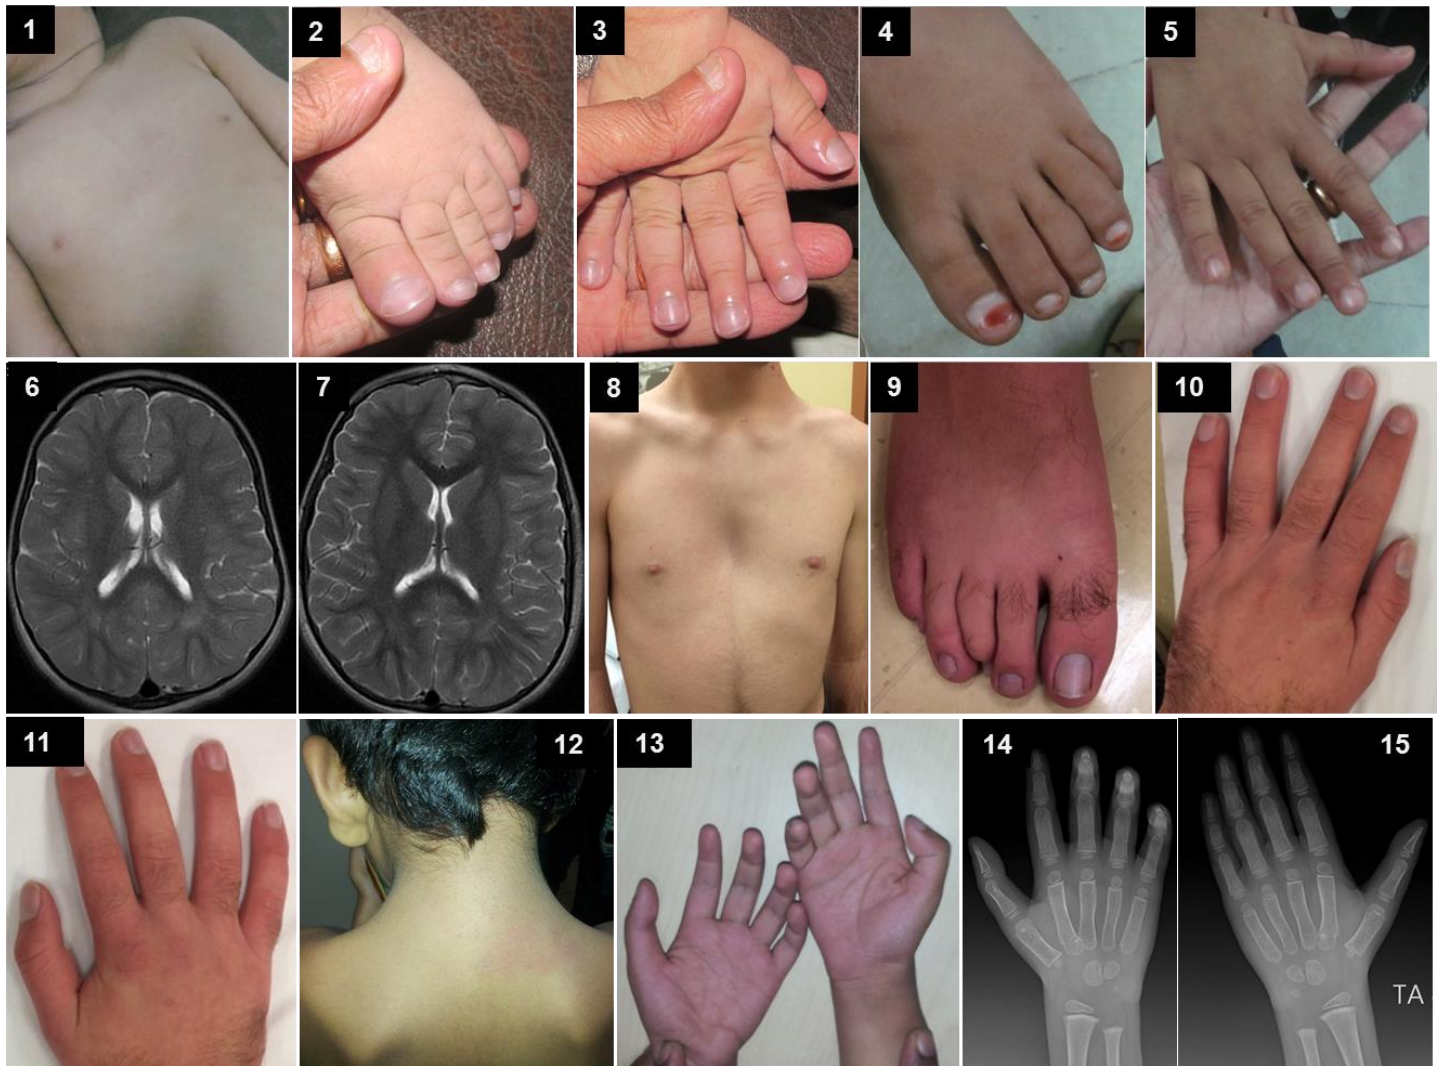

**Figure S1:** Additional clinical photographs of the families

(1-7) Photograph of proband (1-II.4 in Figure 1A) showing wide spaced nipples (1), normal toes and fingers (2 and 3; cyanosis and clubbing due to heart disease) and his affected elder sister (1-II.1 in Figure 1A) presented with long fingers and toes (4 and 5). MRI findings of both the affected members in family 1 were normal (6 is of 1-II.4 and 7 is of 1-II.1). (8-11) Photograph of the proband in family 3 showing pectus excavatum (8), bilateral overlapping of the 3<sup>rd</sup> toe by the 2<sup>nd</sup> and 4<sup>th</sup> toes (9) and arachnodactyly of the fingers (10, 11). (12-15) Photograph of the proband in family 4 showing webbed neck (12), slender fingers and fetal finger pads (13) and X-ray showing no significant skeletal defects (14, 15).

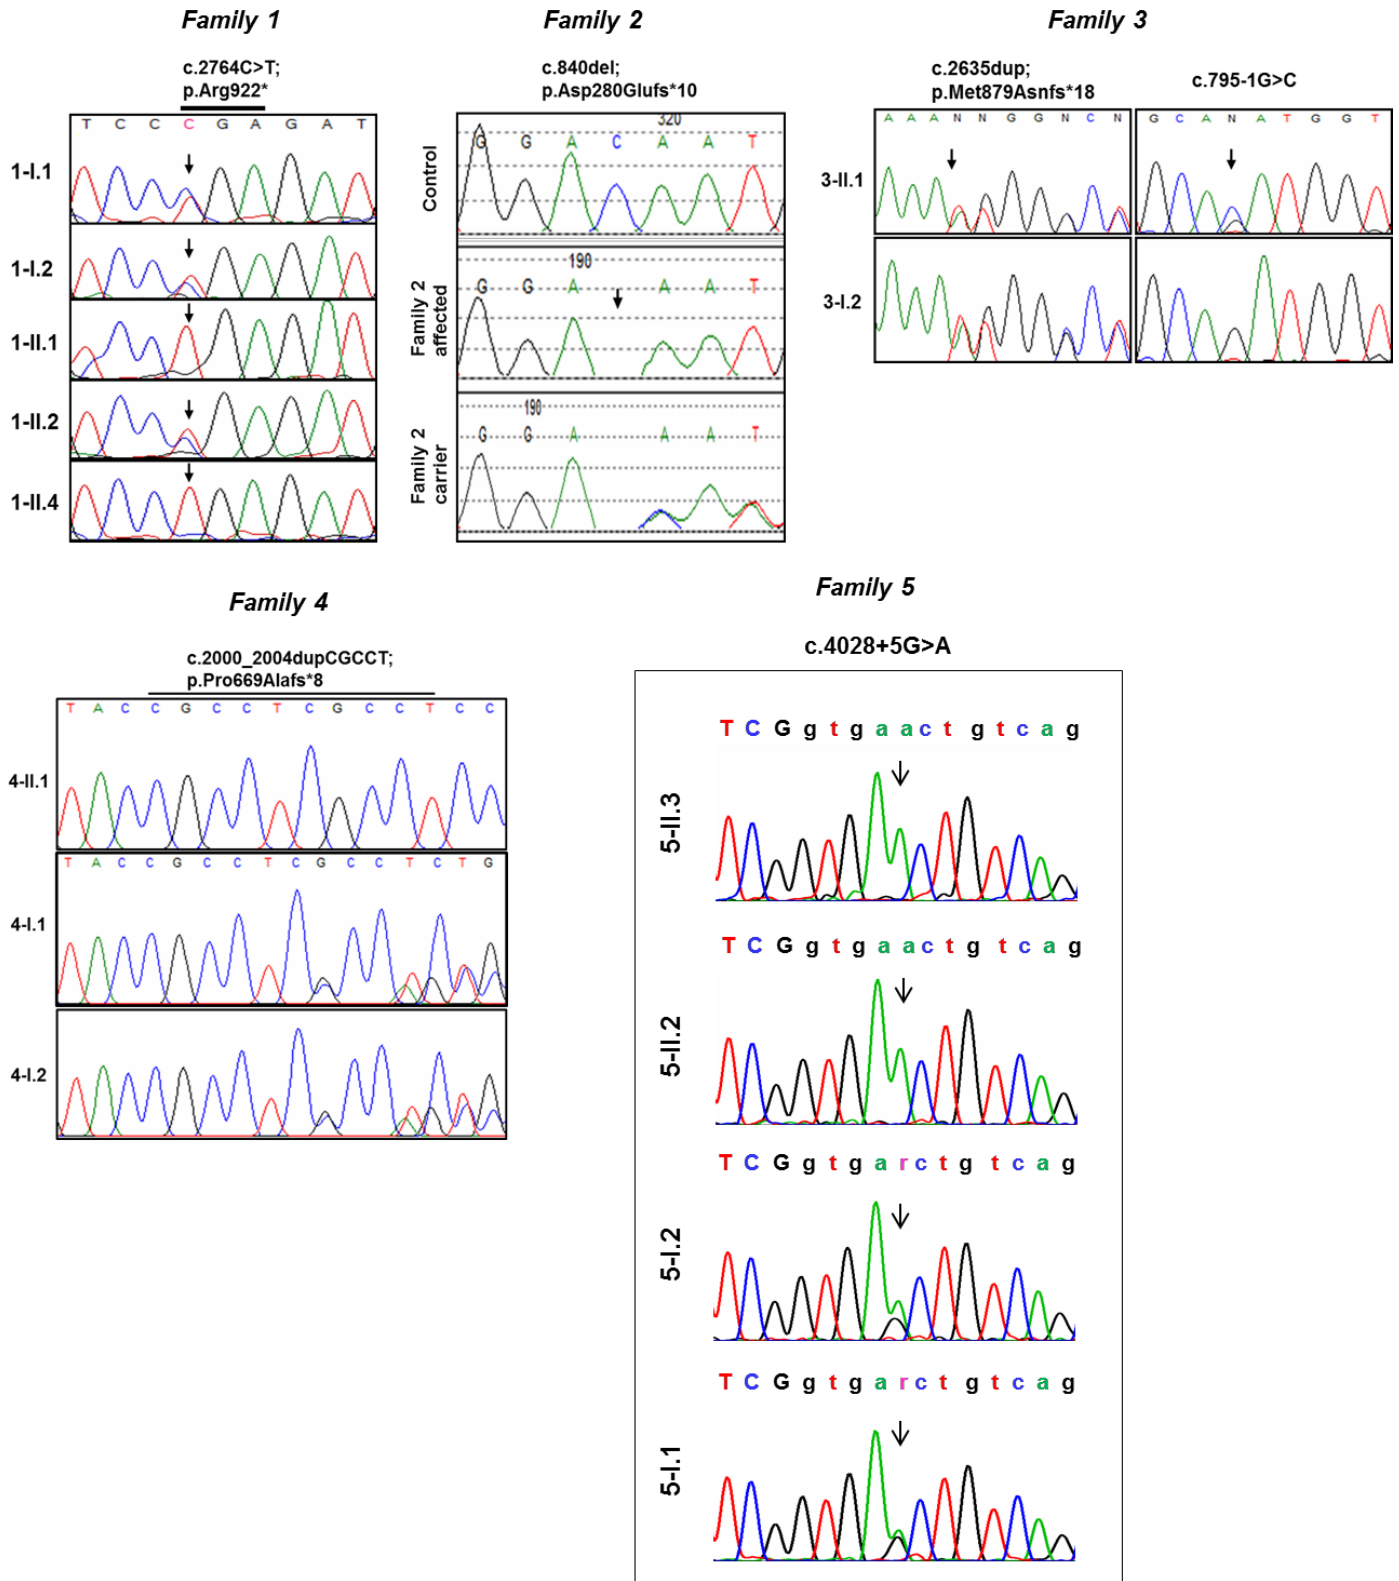

**Figure S2:** Sanger validation of *TMEM94* variants in genomic DNA level

Sanger confirmation and segregation of variants in each family are shown. Family number in respect to corresponding pedigree number in figure 1A and variants in each family are also mentioned.

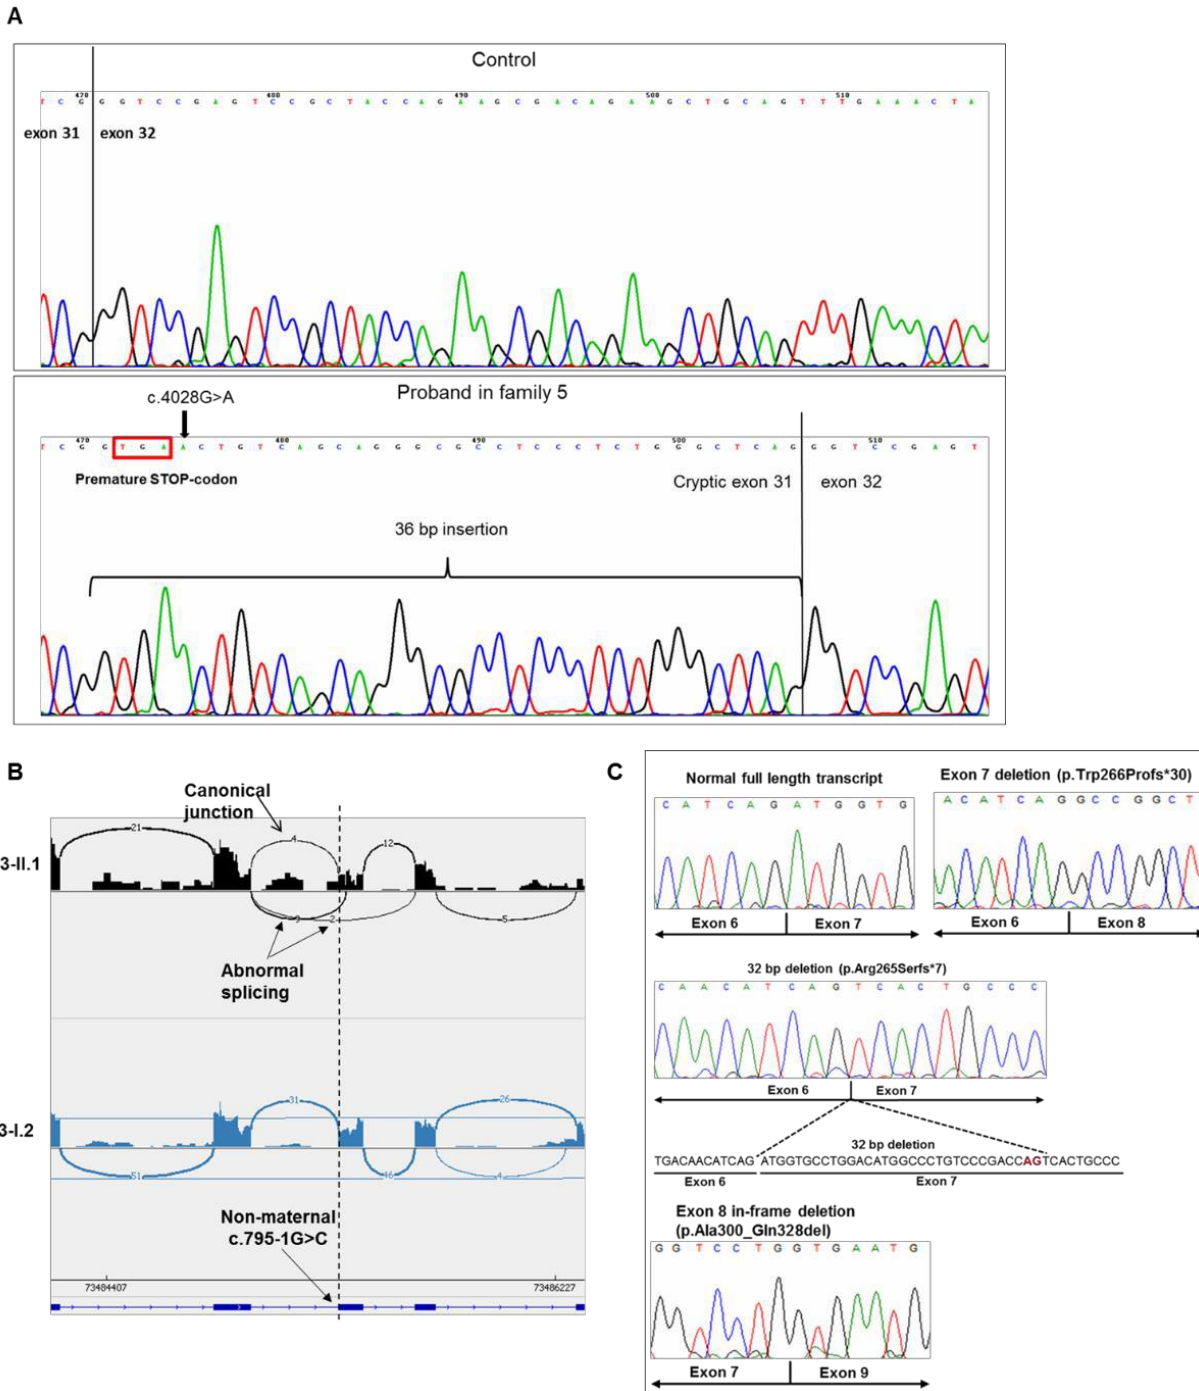

**Figure S3:** Splice site analysis on cDNA derived from the probands of family 3 and 5

(A) cDNA sequencing of primers flanking c.4028+5G>A variant in family 5 revealed an abnormal insertion due to an activation of a cryptic donor site 36 bp downstream within the intron compared to control. The aberrant transcript is predicted to result in a premature termination codon (red box) (B) Sashimi plot showing the splice alteration in the proband (3-II.1) as a result of a splice acceptor variant c.795-1G>C. Two different splice alterations were observed: 2 reads supporting exon skipping and 9 reads supporting a cryptic splice site created within an exon. Mother (3-I.2) did not carry the variant and shows normal canonical splice junctions (C) Multiple mutant transcripts were identified in the proband of family 3 (3-II.1) due to splice defect (shown in main figure 2C). The PCR products were subcloned in to TOPO vector and sequenced to confirm the mutant cDNA sequence. Sanger sequencing chromatograms showing the full-length transcript, exon 7 and exon 8 skipping and the 32bp deletion due to the activation of a cryptic acceptor site in the exonic region (of exon 7) are shown.



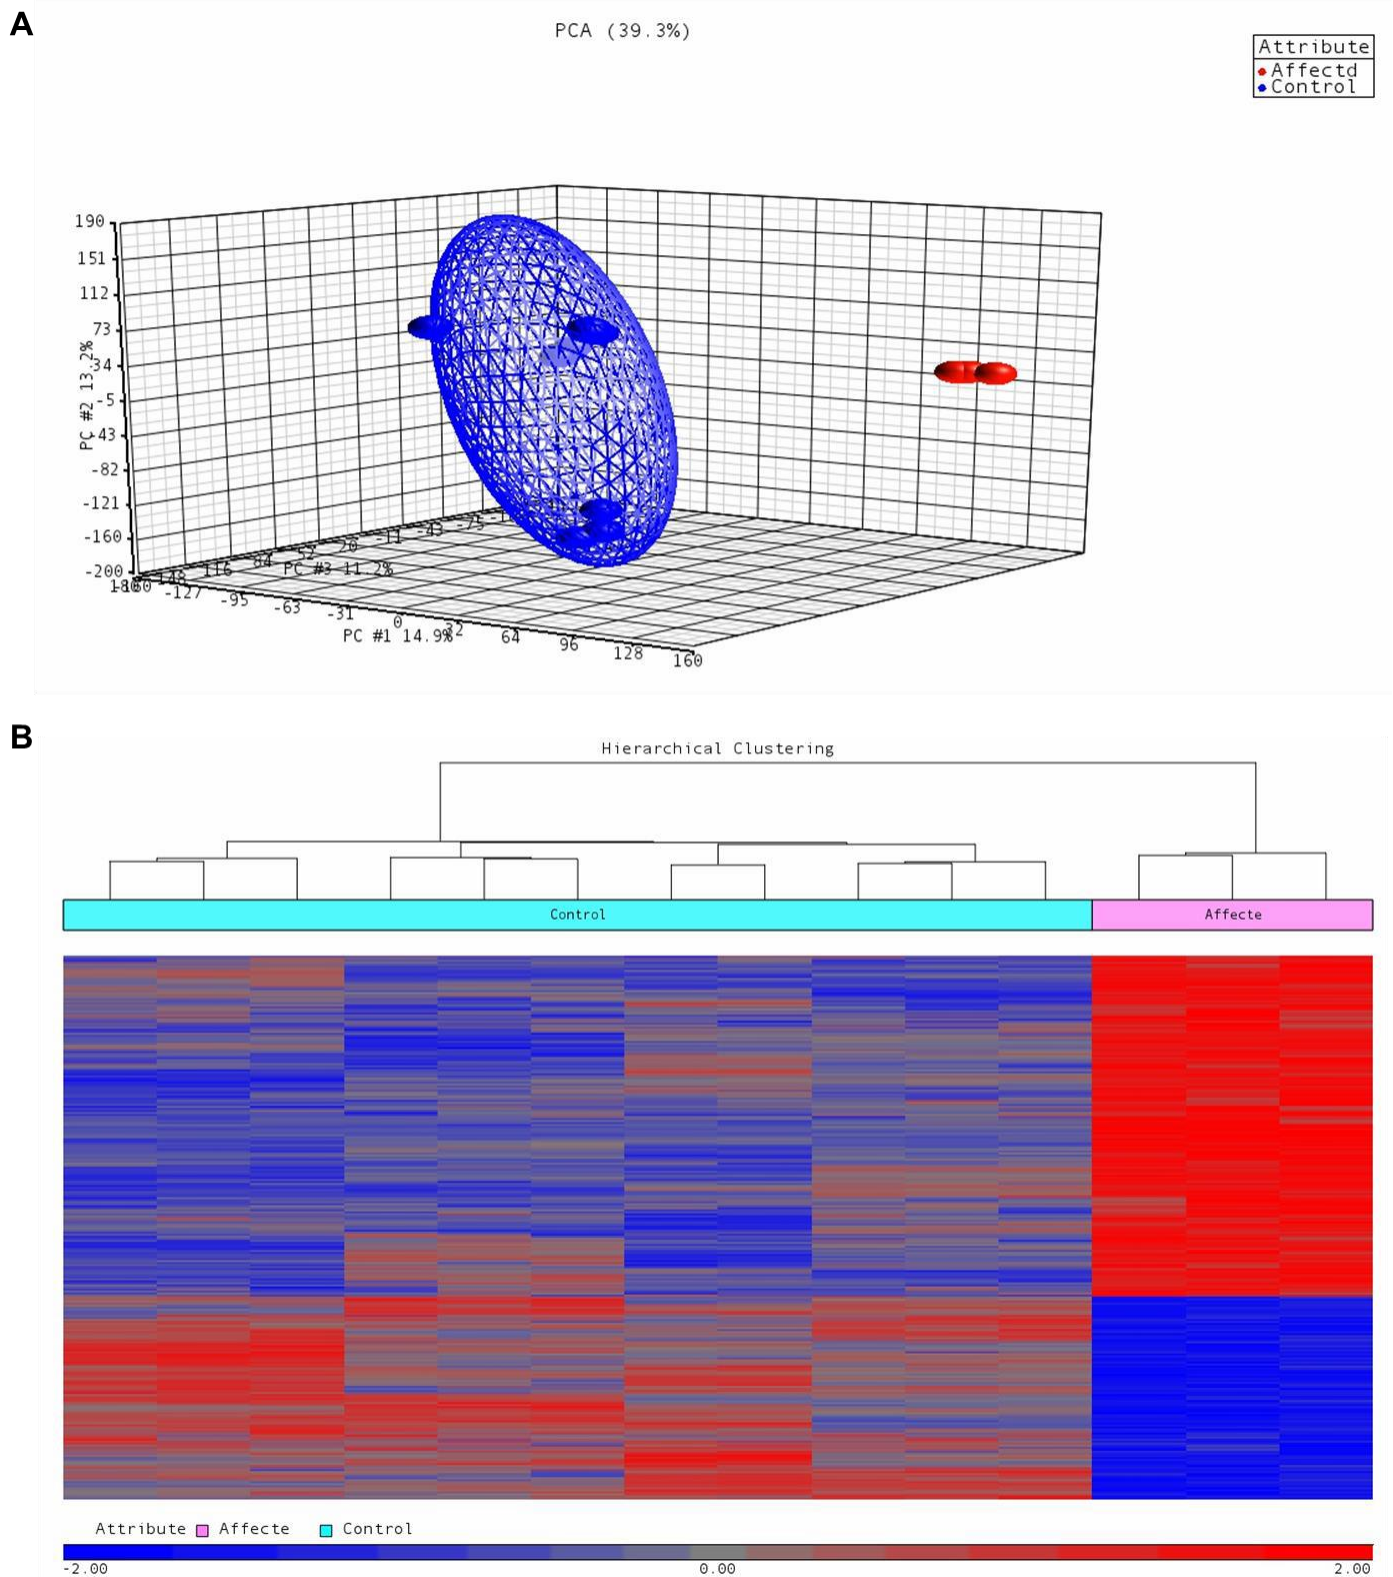

**Figure S4:** Global gene expression profiling using microarray

(A) Principal component analysis (PCA) and (B) Heatmap of genes that are significantly dysregulated in *TMEM94* deficient individual compared to controls. The expression level of each gene across the samples is scaled to [-2,2] interval.

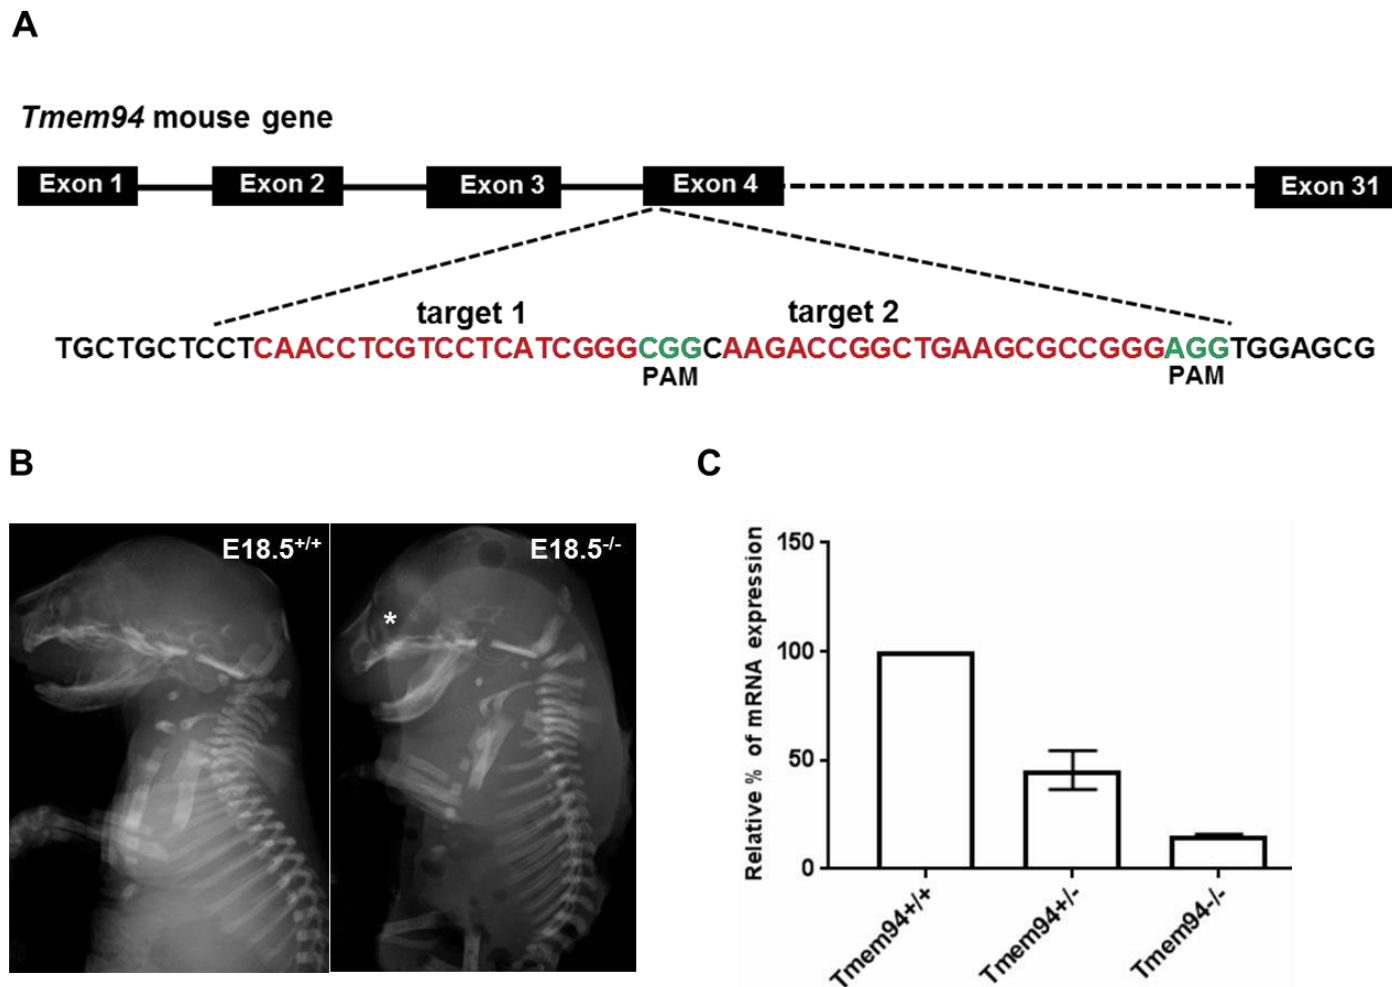

**Figure S5:** *Tmem94*<sup>-/-</sup> mice additional data and phenotype

(A) Schematic diagram representing *Tmem94* mouse gene and the two genomic targets (in exon 4) for CRISPR/Cas9 editing. Red highlighted areas are the two genomic targets in exon 4 and the nucleotides highlighted in green are PAM sequences (NGG), one for each target. The Cas9 is expected to cut few nucleotides upstream to the PAM sequence of each target (B) X-ray radiographs of wild type (left) and mutant (right) at E18.5 days showing reduced nasal bones in the mutant (asterisk) suggesting craniofacial abnormalities. (C) Relative quantification of mRNA level in *Tmem94* mutant embryos. Results were normalized to the expression of the housekeeping gene, *Polr2a*. Error bar represents standard deviation of mean expression in biological replicates.

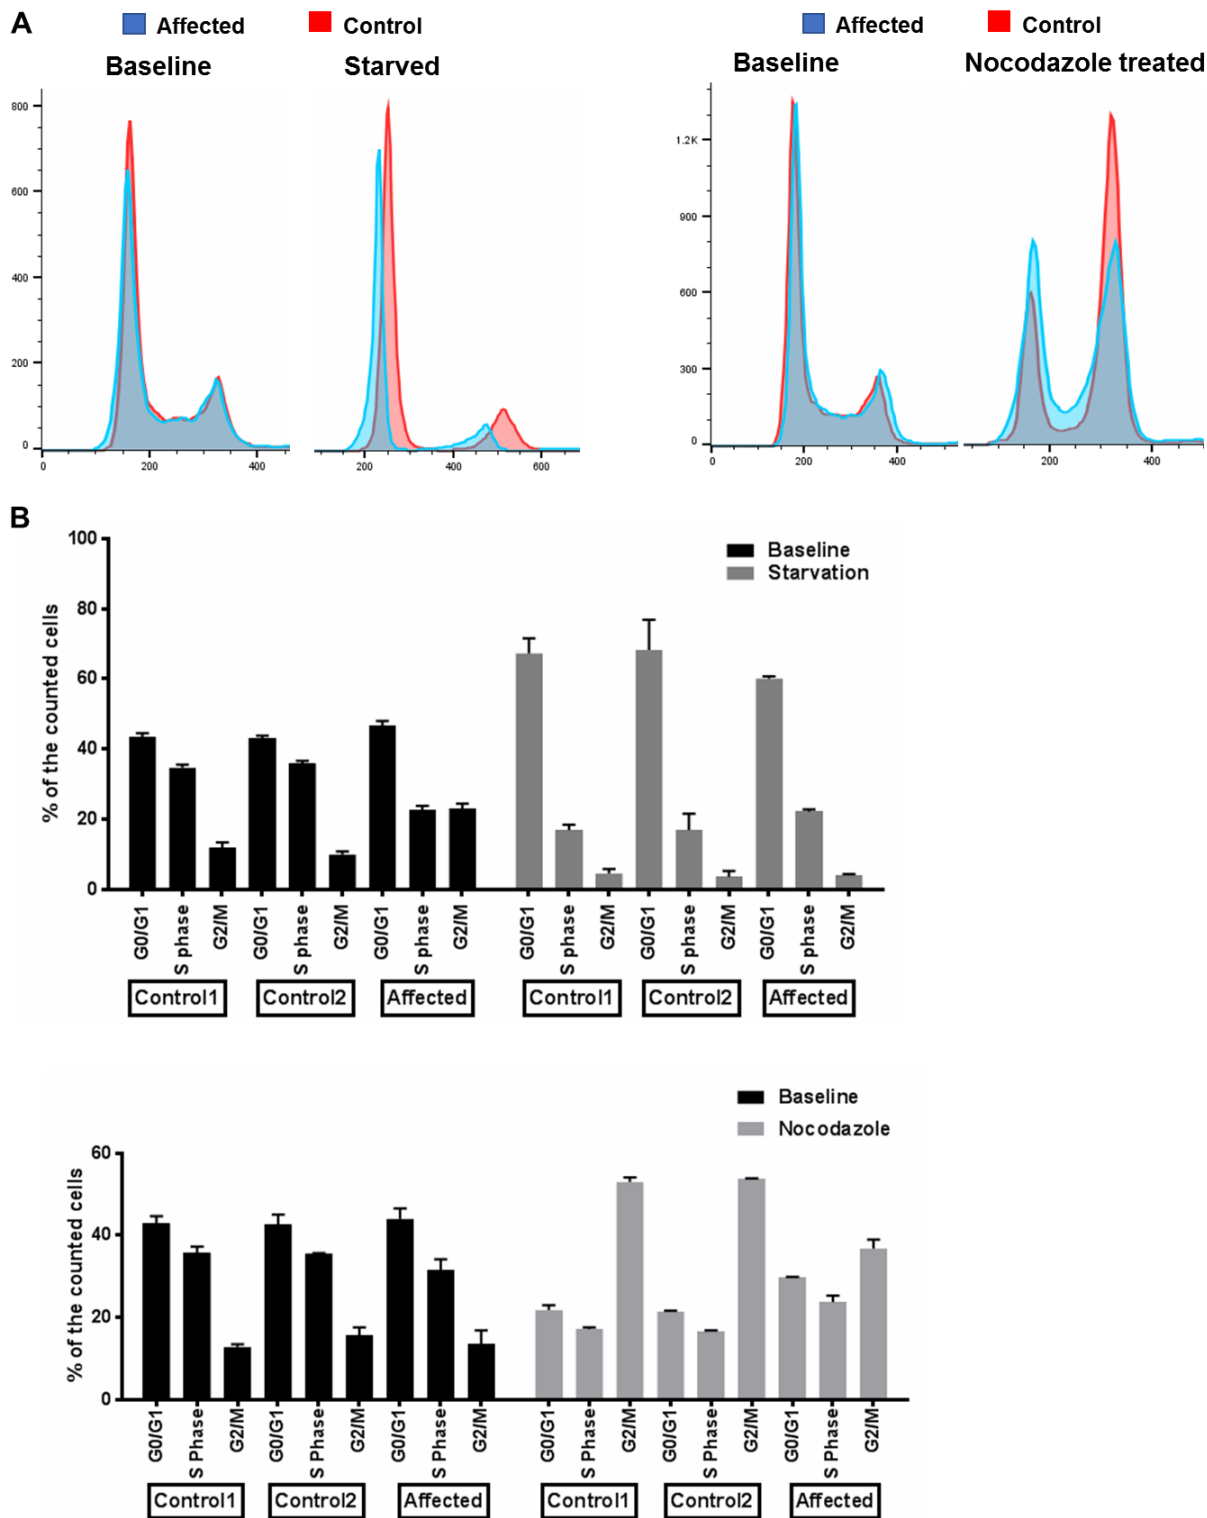

**Figure S6:** Flow cytometry measurement of DNA content of cells at different stages of cell cycle

(A) Representative cell cycle profile of control and proband derived fibroblasts (Blue: affected, Red: Controls) showed elevated percentage G0/G1 cells and lower percentage of the cells in G2/M phase in normal baseline condition. Upon starvation, G0/G1 were further elevated and G2/M phase cells were reduced in both control and affected (left panel). Overnight nocodazole treatment that arrests cells at G2/M phase of cell cycle, showed reduced percentage of G2/M phase cells in the affected, compared to the controls (right panel). (B) Graph showing the quantification of the experiment performed in starvation (Upper panel) and nocodazole treatment (lower panel). Experiments were done in triplicates and the error bar represents standard deviation of means.

## Supplemental tables

| Purpose                                             | Primer sequence                                                                                                                            |
|-----------------------------------------------------|--------------------------------------------------------------------------------------------------------------------------------------------|
| <b>Targeting oligos</b>                             | Target 1: 5'-CCTCAACCTCGTCCTCATCGGGC-3'<br>Target 2: 5'-GCAAGACCGGCTGAAGCGCCGGG-3'                                                         |
| <b>For in-vitro transcription</b>                   | Oligo 1<br>5'- <i>ttttaatac</i> <i>gactcactata</i> GGCCGATGAGGACGAGGTTG <u>gttttagagctagaa</u> -3'                                         |
|                                                     | Oligo 2<br>5'- <i>ttttaatac</i> <i>gactcactata</i> GGAAGACCGGCTGAAGCGCC <u>gttttagagctagaa</u> -3'                                         |
|                                                     | Low caps, Italics: T7 promoter region<br>High caps: genomic target region<br>Low caps, underlined: universal reverse primer binding region |
|                                                     | Universal reverse primer<br>5'- <i>aaaagcaccgactcgg</i> <i>tgccacttttcaag</i> <i>ttgataacggactagcctattttaactgctatttctagctctaaaac</i> -3'   |
|                                                     | Low caps, underlined: Oligo annealing region                                                                                               |
| <b>Mouse genotyping</b>                             | Forward: 5'-GAGGTGGCCATAAGAAATAGGC-3'<br>Reverse: 5'-TGGTGACCGTGGCTATCCTA-3'                                                               |
| <b>Human cDNA splice analysis</b>                   | Forward: 5'-GGGATCAAGGATGACGAGCA-3'<br>Reverse: 5'-GAGGACTGGAAAGAGCAGGG-3'                                                                 |
| <b>M13 Primers for the sequencing of the clones</b> | Forward: 5'-GTAAAACGACGGCCAG-3'<br>Reverse: 5'-CAGGAAACAGCTATGAC-3'                                                                        |
| <b>Human qPCR</b>                                   | <i>TMEM94</i> Forward: 5'-CTGCGAGGGATCATTGACCA-3'<br>Reverse: 5'-CTCTGTAGGCCCCAGTGCAAG-3'                                                  |
|                                                     | <i>POLR2A</i> Forward: 5'-CATGTGCAGGAAACATGACA-3'<br>Reverse: 5'-GCAGAAGAAGCAGACACAGC-3'                                                   |
| <b>Mouse qPCR analysis</b>                          | <i>Tmem94</i> Forward: 5'-GCGAGGAAGACCGTCCGA-3'<br>Reverse: 5'-TGCTTCTCCCTCAGGTCCAT-3'                                                     |
|                                                     | <i>Polr2a</i> Forward: 5'-GCACCATCAAGAGAGTGCAG-3'<br>Reverse: 5'-GTGGATCCATTAGTCCCCCA-3'                                                   |

**Table S1. Primers used in this study**

DNA oligos/primers used guide RNA synthesis, genotyping, cDNA analysis and qPCR



| Family   | Chromosome              | Homozygous stretch        | Candidate genes in the homozygous area |
|----------|-------------------------|---------------------------|----------------------------------------|
| Family 1 | 2                       | 190,970,774 - 207,953,087 | <i>NEMP2</i>                           |
|          | 4                       | 91,295,654 - 122,902,899  | None                                   |
|          | 6                       | 19,613,977 - 30,773,676   | None                                   |
|          | 9                       | 4,093,145 - 11,256,115    | None                                   |
|          | 10                      | 53,838,897 - 73,570,900   | None                                   |
|          | 15                      | 22,559,617 - 35,528,037   | None                                   |
|          | 16                      | 80,593,096 - 86,485,811   | None                                   |
|          | 17                      | 65,148,725 - 78,360,332   | <i>TRIM65, TMEM94</i>                  |
|          | 18                      | 70,471,959 - 73,808,200   | None                                   |
|          | 19                      | 9,465,329 - 44,716,770    | <i>SAMD4B</i>                          |
|          | 20                      | 57,088,334 - 63,025,520   | None                                   |
| Family 2 | 1                       | 29,190,140-39,500,180     | <i>SERINC2</i>                         |
|          | 2                       | 142,742,400-154,088,500   | None                                   |
|          | 4                       | 156,893,000-161,004,600   | None                                   |
|          | 17                      | 71,232,690-75,876,620     | <i>TMEM94</i>                          |
| Family 4 | 1                       | 753,541-4,592,116         | None                                   |
|          | 1                       | 4,598,021-8,345,298       | None                                   |
|          | 1                       | 8,356,170-14,864,580      | None                                   |
|          | 5                       | 10,111,180-15,729,889     | None                                   |
|          | 6                       | 68,452,823-77266188       | None                                   |
|          | 6                       | 99,462,075-103,188,348    | None                                   |
|          | 7                       | 53,998-5,214,016          | None                                   |
|          | 7                       | 6,650,687-13,277,948      | None                                   |
|          | 8                       | 55,402,535-63,461,952     | None                                   |
|          | 8                       | 63,490,414-72,299,671     | None                                   |
|          | 11                      | 204,228-4,460,348         | <i>TRPM5</i>                           |
|          | 12                      | 19,756,366-24,482,034     | None                                   |
|          | 12                      | 47,492,686-62,969,704     | None                                   |
|          | 12                      | 117,988,186-121,821,654   | None                                   |
| 12       | 121,847,135-124,891,294 | None                      |                                        |

|          |    |                         |                      |
|----------|----|-------------------------|----------------------|
|          | 12 | 124,902,199-130,225,459 | <i>TMEM132B</i>      |
|          | 14 | 33,126,223-49,609,674   | None                 |
|          | 14 | 52,640,208-57,040,997   | None                 |
|          | 17 | 68,506,237-75,539,771   | <i>TMEM94</i>        |
| Family 5 | 1  | 27,543,522-34,206,979   | None                 |
|          | 2  | 56,480,570-60,580,831   | None                 |
|          | 6  | 117,392,770-121,904,036 | None                 |
|          | 6  | 134,378,251-138,898,188 | <i>IL20RA</i>        |
|          | 7  | 130,915,278-134,242,036 | None                 |
|          | 11 | 2,252,208-6,324,678     | None                 |
|          | 12 | 53,364,506-57,179,340   | None                 |
|          | 16 | 30,444,444-35,220,544   | None                 |
|          | 17 | 72,044,131-75,164,427   | <i>TMEM94, ITGB4</i> |

**Table S2. Regions of homozygosity**

Homozygous regions segregating with the proband and affected siblings in consanguineous families

|                                                                                                                     | Family 1 | Family 2 | Family 4 | Family 5 |
|---------------------------------------------------------------------------------------------------------------------|----------|----------|----------|----------|
| Total number of variants                                                                                            | 82,025   | 71,450   | 39,739   | 92,141   |
| Homozygous variants                                                                                                 | 35,509   | 33,781   | 15,539   | 29,675   |
| Exonic and splicing                                                                                                 | 9160     | 8,777    | 11,079   | 10,404   |
| Allele frequency <0.01 in ExAC database                                                                             | 95       | 386      | 204      | 232      |
| Number of variants with no healthy homozygote in ExAC database                                                      | 34       | 297      | 95       | 225      |
| Number of variants present in homozygous area                                                                       | 11       | 9        | 21       | 6        |
| Number of variants segregate with the affected sibling and predicted to be pathogenic according to prediction tools | 4        | 2        | 3        | 2        |

**Table S3. Filtering strategy of variants identified in the four consanguineous families (Family 1, 2, 4 and 5)**

Variant filtering and identification of segregated variants in the homozygous area

|                                                                                                                                                                                                                                                                                                                                          |               |
|------------------------------------------------------------------------------------------------------------------------------------------------------------------------------------------------------------------------------------------------------------------------------------------------------------------------------------------|---------------|
| Total number of variants                                                                                                                                                                                                                                                                                                                 | 5,101,964     |
| Exonic and splicing                                                                                                                                                                                                                                                                                                                      | 26,661        |
| Missense + LoF variants                                                                                                                                                                                                                                                                                                                  | 10,366        |
| Allele frequency <0.01 in ExAC database                                                                                                                                                                                                                                                                                                  | 1,772         |
| Number of variants with no healthy homozygote in ExAC database                                                                                                                                                                                                                                                                           | 1,477         |
| Number of heterozygous variants that are greater than or equal to 2 for each gene                                                                                                                                                                                                                                                        | 27 (10 genes) |
| Number of compound heterozygous variants (Father DNA sample was unavailable so the variants that are not inherited from the mother was assumed to be inherited from the father) + number of assumed <i>de novo</i> variants (heterozygous variants that are not inherited from the mother and not seen as heterozygous in ExAC database) | 6             |

**Table S4: Variant filtering strategy of family 3**

Filtering strategy of the variants identified through whole genome sequencing in the affected individual of family 3

| Family   | Genomic position                 | Gene                             | Variant                                  | CADD score | Allele frequency in ExAC       | SIFT        | Mutation Taster | Polyphen -2       |
|----------|----------------------------------|----------------------------------|------------------------------------------|------------|--------------------------------|-------------|-----------------|-------------------|
| Family 1 | Chr2:<br>191383489A>C            | <i>NEMP2</i>                     | c.491T>G<br>p.Leu164Arg                  | 16         | Not present in ExAc and gnomAD | Deleterious | Disease causing | Probably damaging |
|          | Chr17:<br>73887162G>A            | <i>TRIM65</i>                    | c.1252C>T<br>p.Arg418Trp                 | 15         | <b>0.0001726</b>               | Deleterious | Disease causing | Probably damaging |
|          | <b>Chr17:<br/>73491370C&gt;T</b> | <b><i>TMEM94</i></b>             | <b>c.2764C&gt;T,<br/>p.Arg922*</b>       | <b>43</b>  | <b>0.0000086</b>               | <b>NA</b>   | <b>Damaging</b> | <b>NA</b>         |
|          | Chr19:<br>39867411G>A            | <i>SAMD4B</i>                    | c.1084G>A,<br>p.Val362Ile                | 17         | 0.0000165                      | Tolerated   | Disease causing | Probably damaging |
| Family 2 | Chr1:<br>31906993T>C             | <i>SERINC2</i>                   | c.1327T>C<br>p.Tyr443His                 | 28.8       | NA                             | Deleterious | Disease causing | Probably damaging |
|          | <b>Chr17:<br/>73485392del</b>    | <b><i>TMEM94</i></b>             | <b>c.840del,<br/>p.Asp280Glufs*10</b>    | <b>NA</b>  | <b>NA</b>                      | <b>NA</b>   | <b>NA</b>       | <b>NA</b>         |
| Family 3 | <b>17:73485346</b>               | <b><i>TMEM94</i><sup>b</sup></b> | <b>NM_001321148.1:<br/>c.795-1G&gt;C</b> | <b>21</b>  | <b>NA</b>                      | <b>NA</b>   | <b>Damaging</b> | <b>NA</b>         |

|          |                                             |                                            |                                                                  |      |                 |             |                    |                      |
|----------|---------------------------------------------|--------------------------------------------|------------------------------------------------------------------|------|-----------------|-------------|--------------------|----------------------|
|          | 17:73490987                                 | <i>TMEM94</i> <sup>a</sup>                 | NM_001321148.1:<br>c.2635dupA;<br>p.(Met879Asnfs*18)             | NA   | NA              | NA          | NA                 | NA                   |
|          | 20:62194000                                 | <i>HELZ2</i> <sup>a</sup><br>(MIM611265)   | NM_001037335.2:<br>c.6175C>T;<br>NP_001032412.2:p<br>.Arg2059Trp | 5    | 0.0004468<br>1  | Damaging    | Tolerated          | Benign               |
|          | 20:62195413                                 | <i>HELZ2</i> <sup>b</sup>                  | NM_001037335.2:<br>c.4762G>C;<br>NP_001032412.2:p<br>.Gly1588Arg | 0    | 0.0000099<br>2  | Tolerated   | Tolerated          | Benign               |
|          | 8:61774792                                  | <i>CHD7</i> <sup>b</sup><br>(MIM 608892)   | NM_017780.3:c.78<br>68C>T;<br>NP_060250.2:p.Pr<br>o2623Leu       | 33   | NA              | Damaging    | Damaging           | Probably<br>Damaging |
|          | 1:7724106                                   | <i>CAMTA1</i> <sup>b</sup><br>(MIM 611501) | NM_015215.2:c.14<br>99G>C;<br>NP_056030.1:p.Gl<br>y500Ala        | 19   | NA              | Damaging    | Damaging           | Probably<br>Damaging |
| Family 4 | Chr11:<br>2434775G>A                        | <i>TRPM5</i>                               | c.1934C>T;<br>p.Thr645Met                                        | 24.6 | 0.0000087<br>36 | Deleterious | Disease<br>causing | Probably<br>damaging |
|          | Chr12:<br>126138252T><br>C                  | <i>TMEM132B</i>                            | c.769T>C;<br>p.Trp257Arg                                         | 25.4 | 0.0000165<br>6  | Deleterious | Disease<br>causing | Probably<br>damaging |
|          | <b>Chr17:<br/>73489067_734<br/>89071dup</b> | <i>TMEM94</i>                              | <b>c.2000_2004dup;<br/>p.Pro669Alafs*8</b>                       | NA   | NA              | NA          | NA                 | NA                   |
| Family 5 | Chr17:<br>73725516 C>T                      | <i>ITGB4</i>                               | c.737C>T;<br>p.(Thr246Met)                                       | NA   | NA              | Deleterious | Disease<br>causing | Probably<br>damaging |
|          | <b>Chr17:<br/>73495168G&gt;A</b>            | <i>TMEM94</i>                              | <b>c.4028+5G&gt;A; p.?</b>                                       | NA   | NA              | NA          | NA                 | NA                   |
| Family 6 | <b>Chr17:<br/>7349392del</b>                | <i>TMEM94</i>                              | <b>c.3497delA;<br/>p.Asn1166Thrfs*84</b>                         | NA   | NA              | NA          | NA                 | NA                   |
|          | Chr17:<br>78087081G>A                       | <i>GAA</i>                                 | c.2105G>A;<br>p.Arg702His                                        | 32   | 0.00005         | Deleterious | Disease<br>causing | Probably<br>damaging |

a, maternal; b, non-maternal; NA, not available

**Table S5. Final list of variants in in all families**

Final list of variants that are segregated with affected individuals of all 6 families. For family 1, 2, 4, 5 and 6 all the variants shown are homozygous and for family 3, all the variants listed are heterozygous. In family 1, all four variants were heterozygous in the unaffected sibling and parents (Figure 2A-II.2), and homozygous in both affected individuals (Figure 2A-II.1 and II.4). In family 2, the two variants (in *SERINC2* and *TMEM94*) were segregated with the affected status. Truncating variants in *TMEM94* is common in all families.



| Gene                       | Log <sub>2</sub> Fold Change | P-adjusted value |
|----------------------------|------------------------------|------------------|
| <b>Downregulated genes</b> |                              |                  |
| <i>PTN</i>                 | -5.431                       | 0.036297         |
| <i>RNU5F-1</i>             | -1.799                       | 0.046349         |
| <i>WWC1</i>                | -1.765                       | 0.048065         |
| <i>HSPA7</i>               | -1.546                       | 0.018122         |
| <i>ABCA10</i>              | -1.404                       | 2.24E-08         |
| <i>FEZ1</i>                | -1.115                       | 0.003138         |
| <i>TP73</i>                | -1.166                       | 0.010215         |
| <i>SAT1</i>                | -1.098                       | 0.000908         |
| <i>TMEM94</i>              | -0.932                       | 3.72E-06         |
| <i>WSB2</i>                | -0.909                       | 0.009543         |
| <i>PIGZ</i>                | -0.845                       | 0.01331          |
| <i>DDIT4</i>               | -0.781                       | 0.005472         |
| <i>LSM10</i>               | -0.527                       | 0.009628         |
| <i>SNRPA</i>               | -0.53                        | 0.0205           |
| <i>NPRL3</i>               | -0.278                       | 0.049298         |
| <i>LSM14B</i>              | -0.259                       | 0.034164         |
| <i>DCAF16</i>              | -0.245                       | 0.021265         |
| <b>Upregulated genes</b>   |                              |                  |
| <i>CUL4A</i>               | 0.264                        | 0.027476         |
| <i>C5orf24</i>             | 0.305                        | 0.034925         |
| <i>ZNF525</i>              | 0.456                        | 0.005502         |
| <i>N4BP2</i>               | 0.623                        | 0.019307         |
| <i>HSPBAP1</i>             | 0.651                        | 0.027831         |
| <i>RBM3</i>                | 0.655                        | 0.001065         |
| <i>ARL14EP</i>             | 0.772                        | 0.000299         |
| <i>TP63</i>                | 0.862                        | 0.010919         |
| <i>ERMAP</i>               | 0.907                        | 0.000539         |
| <i>ADO</i>                 | 0.948                        | 0.02027          |
| <i>ZNF239</i>              | 0.911                        | 0.046975         |
| <i>PCBD2</i>               | 1.059                        | 0.003243         |
| <i>DHRS3</i>               | 1.514                        | 0.021039         |
| <i>DAB2IP</i>              | 2.376                        | 0.000176         |
| <i>WFDC2</i>               | 3.963                        | 2.27E-07         |

**Table S7. List of genes in the *TMEM94* interaction network identified in all the affected siblings in family 2**

Detailed table displaying the fold change equal or greater than 1.5, with their corresponding *P*-adjusted values of genes identified in *TMEM94* interaction network of dysregulated genes identified through RNA Sequencing (Benjamini-Hochberg correction for multiple comparisons). Interestingly, some of the genes identified have profound role in neurological function; *RBM3* (MIM 300027), which is associated with synapse regeneration<sup>1</sup> and shown to interact with *TMEM94*<sup>2</sup>; *PTN* (MIM 162095), a mitogenic protein involves in neurite outgrowth and embryogenesis<sup>3</sup>, *TP73* (MIM 601990), which is thought to be involved in the process of neurodegeneration<sup>4</sup>; *WWC*, a gene associated with human memory performance<sup>5</sup>; *FEZ1* (MIM 604825), observed to be involved in axonal outgrowth<sup>6</sup>; *NPRL3* (MIM 600928), a regulator of mTOR signaling and associated with focal epilepsy and

cortical dysplasia (MIM 617118)<sup>7, 8</sup>; and *CUL4A* (MIM 603137), is involved in cell cycle progression and early embryogenesis<sup>9, 10</sup>.

## Supplemental Methods

### SNP array, whole exome sequencing and whole genome sequencing

For Family 1, SNP genotyping was performed on genomic DNA from the proband and parents as previously described<sup>11</sup>; regions of homozygosity greater than 5Mb were selected for further analysis. Exome sequencing was performed using the Agilent SureSelect Target Enrichment Kit and the Illumina HiSeq 2000/2500 sequencer (Illumina, San Diego, CA) according to the manufacturer's instructions. Reads were aligned with human reference genome (hg19; NCBI build 37; Feb. 2009) using the Burrows-Wheeler Alignment Tool<sup>12</sup>. Variant calling was performed with GATK<sup>13</sup> and functionally annotated using SnpEff<sup>14</sup>. Because of consanguinity in the pedigree, homozygous variants were filtered based on allele frequencies less than 0.01 with no reported healthy homozygotes in online databases, dbSNP, 1000G, ESP6500 and ExAC. Likely pathogenicity was determined by online prediction tools (Polyphen, SIFT, CADD, and Mutation Taster) or if the variants were truncating (splicing or non-sense). For confirmation and family screening, the identified candidates were PCR amplified using primers flanking specific regions. PCR products were treated with BigDye V3.1 Terminator chemistry (Applied Biosystems, Warrington, UK) and electrophoresed on a ABI 3130xl genetic analyzer (Applied Biosystems, Foster city, CA, USA). The Sanger sequencing data were analyzed using Sequencher software (Gene Codes Corporation, Ann Arbor, MI, USA).

For Family 2, blood was collected in EDTA vials and DNA was extracted from all family members and subjected to genotyping (Axiom SNP chip platform) as described<sup>15</sup>. Index DNA was subjected to exome sequence by using TruSeq Exome Enrichment kit (Illumina) under the manufacturer's guidelines. Prepared sequence libraries were enriched using the Illumina Exome Enrichment protocol and sequenced using an Illumina HiSeq 2000 Sequencer. Sequenced reads were aligned against UCSC hg19 by BWA (see URL's). Homozygous variants (coding and splicing) within the 2MB region of ROH were considered as candidates based on the following criteria: MAF <0.01 in variant databases (see URL's) including 1000 Genomes, ExAC, gnomAD and exome variant server and in 2,379 in-house exomes; scores in SIFT, Polyphen and CADD Phred; and confirmation of identified homozygous variants by segregation in the family.

For Family 3, Whole Genome Sequencing was performed using the Illumina HiSeq sequencing platform. Briefly, DNA was extracted from the provided sample and measured for integrity via gel electrophoresis and appropriate concentration via fluorescent concentration determination. The DNA was then sonicated to a specific fragment size and prepared as a paired-end library with ligation of Illumina-flow cell specific adapter sequences and a unique barcode. Prepared library was then quality checked for adequate yield through fluorescent methods and quantitative PCR, as well as accurate library size and profile using bioanalysis. Libraries were clustered onto

Illumina HiSeq flow cells and sequenced using standard Illumina reagents and protocols. After sequencing, reads were generated using Illumina's bcl2 fastq and data were aligned to the human reference GRCh37. Using this technology, it is only possible to sequence 90% to 95% of the human reference genome. Analysis of the sequencing depth of all coding regions of the genome is available upon request. A gene with insufficient coverage may harbor variants that are not detected by this test. A gene may appear to have inadequate coverage when there is a deletion or insertion in the proband's gene sequence compared to the reference sequence.

For Family 4, exome sequencing was carried out on clinical basis. Genomic DNA was isolated from blood collected from proband and the parents by QIAamp DNA Blood Mini Kit (Qiagen, Valencia, CA, USA) according to manufacturer's instructions. Chromosomal microarray (CMA) was done on leukocyte-derived DNA of the proband using Illumina HumanCytoSNP-12. The genome-wide resolution of this array is ~30 kb. CMA showed no pathogenic copy number variants. A benign hemizygous deletion of size 296 kb was found at cytoband Xq28 (genomic coordinates 154939018-155235833 GRCh37/hg19) (genes *SPRY3*, *VAMP7*, *IL9R*), in addition to 19 regions of homozygosity. For exome sequencing, genomic capture was performed using Illumina's Nextera Rapid Capture Exome Kit. NextSeq500 Sequencer (Illumina, Inc., San Diego, CA, USA.) in combination with the NextSeq™ 500 High Output Kit (2×150 bp) was used for massive parallel sequencing. The raw data analysis and variant calling were performed based on GATK Best Practices for germline SNPs and Indels (version 3.6-0-g89b7209). Annotation of the called variants was done by ANNOVAR v.2016Feb01. Along with annotation, Online Mendelian Inheritance in Man (OMIM) and Human Phenotype Ontology (HPO) phenotypic information were also integrated using the in-house developed scripts. The strategy used for the variant filtering is as described in the Table S3. Candidate variants were validated and segregation analysis was carried out by Sanger sequencing.

For Family 5, genomic DNA was extracted from EDTA blood of the proband, her sister and her parents. Affymetrix Cytoscan (2.65 M) Array on the proband was performed calling bigger CNVs and regions of homozygosity greater than 3 Mb. Whole Exome Sequencing (WES) on the proband was performed using the Agilent SureSelectXT Kit (V6) with paired-end sequencing (HiSeq SBS Kit v4, 125 Fwd-125 Rev, Q30-value: 79.5) on a HiSeq System (Illumina Inc.). Raw fastQ files were aligned to the hg19 reference genome using NextGene (Softgenetics). Variants observed in at least 16% of reads with sufficient quality level and with Minor Allele Frequency  $\leq 2\%$  were investigated for deleterious In-Silico effects, by associations of the affected genes with proband's phenotype, by literature search for evident functional information and because of suspicion for consanguinity of the parents for homozygosity. The *TMEM94* (NM\_014738.5) variants from the WES were confirmed in index, her sister and their parents after PCR amplification by Sanger sequencing using an ABI Genetic Analyzer 3730 (Applied Biosystems, Foster City, California).

For Family 6, clinical whole exome sequencing (XomeDx) was performed on the proband, mother, father and unaffected sister, at GeneDx (Gaithersburg, MD, USA).

## Cell cycle assay

Skin derived fibroblasts from the affected individual from family 3 (Family 3-II.1) and two unaffected controls (purchased from ATCC, Manassas, VA, USA, catalogue number PCS-201-012) were seeded in 50-60% confluence. Cells were synchronized either by starvation in serum-free EBSS media for 48 hours, or treatment with 100ng/mL nocodazole overnight. Cells were then washed twice in cold phosphate buffered saline, and trypsinized. Harvested cells were subsequently fixed and stained with propidium iodide (PI) (NuCycl™ PI Kit; Exalpa Biologicals, Shirley, MA, USA) according to the manufacturer's instructions, and PI staining was quantified with a BD FACS Calibur flow cytometer (BD Biosciences, San Jose, CA, USA). The percentage of the cells in G0/G1, S, and G2/M phase were automatically counted and compared (FlowJo software; TreeStar, Ashland, OR, USA). The experiments were repeated in triplicate.

## Supplemental References

1. Peretti, D., Bastide, A., Radford, H., Verity, N., Molloy, C., Martin, M.G., Moreno, J.A., Steinert, J.R., Smith, T., Dinsdale, D., et al. (2015). RBM3 mediates structural plasticity and protective effects of cooling in neurodegeneration. *Nature* 518, 236-239.
2. Zhu, X., Zelmer, A., Kapfhammer, J.P., and Wellmann, S. (2016). Cold-inducible RBM3 inhibits PERK phosphorylation through cooperation with NF90 to protect cells from endoplasmic reticulum stress. *FASEB journal : official publication of the Federation of American Societies for Experimental Biology* 30, 624-634.
3. Li, Y.S., Milner, P.G., Chauhan, A.K., Watson, M.A., Hoffman, R.M., Kodner, C.M., Milbrandt, J., and Deuel, T.F. (1990). Cloning and expression of a developmentally regulated protein that induces mitogenic and neurite outgrowth activity. *Science* 250, 1690-1694.
4. Wetzel, M.K., Naska, S., Laliberte, C.L., Rymar, V.V., Fujitani, M., Biernaskie, J.A., Cole, C.J., Lerch, J.P., Spring, S., Wang, S.H., et al. (2008). p73 regulates neurodegeneration and phospho-tau accumulation during aging and Alzheimer's disease. *Neuron* 59, 708-721.
5. Papassotiropoulos, A., Stephan, D.A., Huentelman, M.J., Hoerdli, F.J., Craig, D.W., Pearson, J.V., Huynh, K.D., Brunner, F., Corneveaux, J., Osborne, D., et al. (2006). Common Kibra alleles are associated with human memory performance. *Science* 314, 475-478.
6. Bloom, L., and Horvitz, H.R. (1997). The *Caenorhabditis elegans* gene *unc-76* and its human homologs define a new gene family involved in axonal outgrowth and fasciculation. *Proc Natl Acad Sci U S A* 94, 3414-3419.
7. Ricos, M.G., Hodgson, B.L., Pippucci, T., Saidin, A., Ong, Y.S., Heron, S.E., Licchetta, L., Bisulli, F., Bayly, M.A., Hughes, J., et al. (2016). Mutations in the mammalian target of rapamycin pathway regulators NPRL2 and NPRL3 cause focal epilepsy. *Annals of neurology* 79, 120-131.
8. Sim, J.C., Scerri, T., Fanjul-Fernandez, M., Riseley, J.R., Gillies, G., Pope, K., van Roozendaal, H., Heng, J.I., Mandelstam, S.A., McGillivray, G., et al. (2016). Familial cortical dysplasia caused by mutation in the mammalian target of rapamycin regulator NPRL3. *Annals of neurology* 79, 132-137.
9. Kopanja, D., Stoyanova, T., Okur, M.N., Huang, E., Bagchi, S., and Raychaudhuri, P. (2009). Proliferation defects and genome instability in cells lacking Cul4A. *Oncogene* 28, 2456-2465.
10. Li, B., Ruiz, J.C., and Chun, K.T. (2002). CUL-4A is critical for early embryonic development. *Molecular and cellular biology* 22, 4997-5005.
11. Stephen, J., Vilboux, T., Haberman, Y., Pri-Chen, H., Pode-Shakked, B., Mazaheri, S., Marek-Yagel, D., Barel, O., Di Segni, A., Eyal, E., et al. (2016). Congenital protein losing enteropathy: an inborn error of lipid metabolism due to DGAT1 mutations. *European journal of human genetics : EJHG* 24, 1268-1273.
12. Li, H., and Durbin, R. (2009). Fast and accurate short read alignment with Burrows-Wheeler transform. *Bioinformatics (Oxford, England)* 25, 1754-1760.



13. McKenna, A., Hanna, M., Banks, E., Sivachenko, A., Cibulskis, K., Kernytsky, A., Garimella, K., Altshuler, D., Gabriel, S., Daly, M., et al. (2010). The Genome Analysis Toolkit: a MapReduce framework for analyzing next-generation DNA sequencing data. *Genome research* 20, 1297-1303.
14. Cingolani, P., Platts, A., Wang le, L., Coon, M., Nguyen, T., Wang, L., Land, S.J., Lu, X., and Ruden, D.M. (2012). A program for annotating and predicting the effects of single nucleotide polymorphisms, SnpEff: SNPs in the genome of *Drosophila melanogaster* strain w1118; iso-2; iso-3. *Fly* 6, 80-92.
15. Alkuraya, F.S. (2012). Discovery of rare homozygous mutations from studies of consanguineous pedigrees. *Current protocols in human genetics* Chapter 6, Unit6.12.
